# Supplementary material for: A Major Role for the Plasmodium falciparum ApiAP2 Protein PfSIP2 in Chromosome End Biology
Source: PubMed Central journal article supplement (PMC2829057; doi:10.1371/journal.ppat.1000784), 2010-02-26

Figure S1

**A**

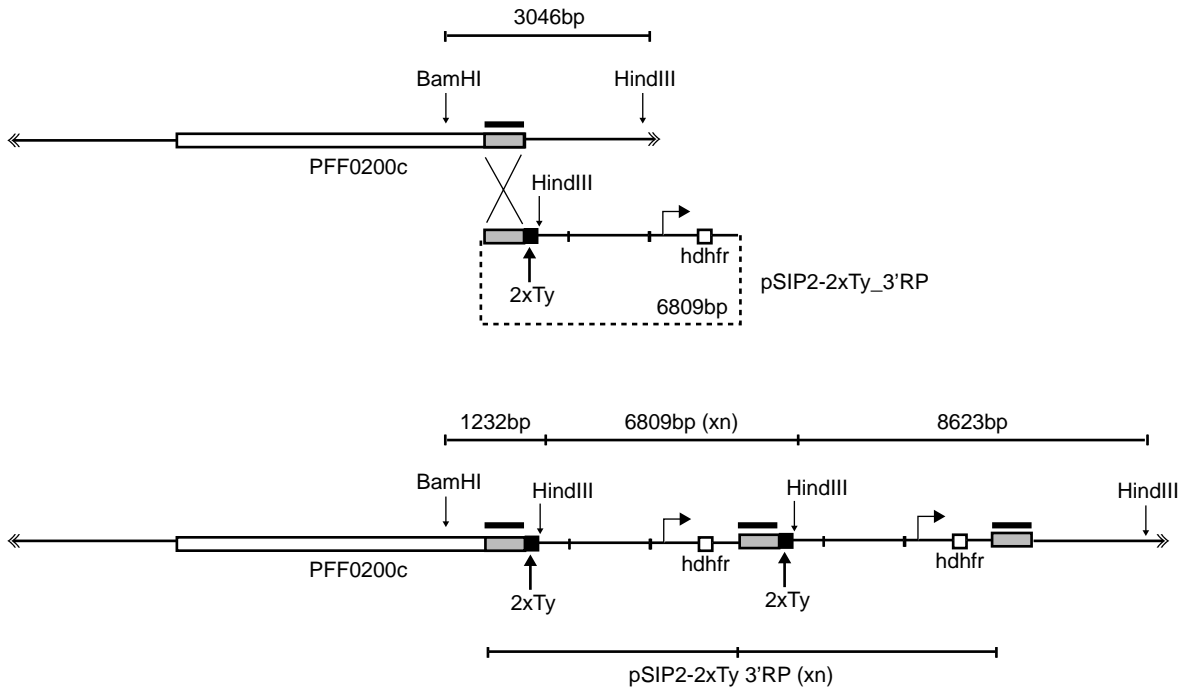

**B**

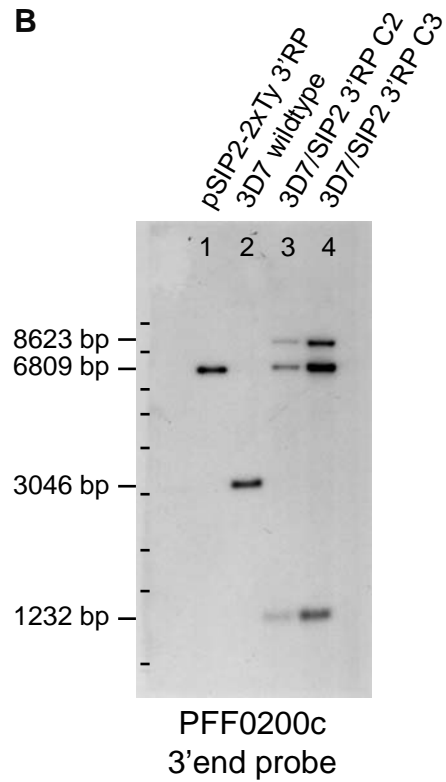

Supplement: ppat.1000784.s001.pdf [file ppat.1000784.s001.pdf]
