# Supplementary material for: A Major Role for the Plasmodium falciparum ApiAP2 Protein PfSIP2 in Chromosome End Biology
Source: PubMed Central journal article supplement (PMC2829057; doi:10.1371/journal.ppat.1000784), 2010-02-26
Supplement: ppat.1000784.s005.pdf [file ppat.1000784.s005.pdf]

**Table S1: SEQUEST search results**

**SPE2 affinity purification; 2 unique peptides; orange: detected exclusively in the SPE2 sample; grey: ribosomal proteins**

| Reference                                                                                                             | Peptide                             | MH+        | DeltaM   | z | P (pro)  | Score  | Coverage | MW       | Peptide (Hits)  |
|-----------------------------------------------------------------------------------------------------------------------|-------------------------------------|------------|----------|---|----------|--------|----------|----------|-----------------|
| Scan(s)                                                                                                               |                                     |            |          |   | P (pep)  | XC     | DeltaCn  | Sp       | Ions            |
| 1 psu PF11445w   organism=Plasmodium_falciparum_3D7   product=High molecular weight rhostry protein-2   location=MAL9 |                                     |            |          |   | 7.67E-12 | 280.31 |          | 162560.6 | 28 (28 0 0 0 0) |
| 3785                                                                                                                  | K.HLINADDVSPSYINLYR.S               | 1990.00281 | 0.00127  | 2 | 7.67E-12 | 6.20   | 0.65     | 2897.6   | 28/32           |
| 4807                                                                                                                  | R.LFVTEGTLEYLLLDK.I                 | 1753.96228 | 0.00017  | 2 | 1.60E-07 | 5.61   | 0.54     | 2691.4   | 25/28           |
| 2852                                                                                                                  | K.SLYGNNNNNNAGSESDVTLK.S            | 2110.96362 | -0.00019 | 2 | 2.06E-10 | 5.55   | 0.54     | 906.3    | 22/38           |
| 2591                                                                                                                  | K.GSQNTEGESEVPSDDEINK.T             | 2034.87341 | 0.00139  | 2 | 6.43E-09 | 5.48   | 0.48     | 1099.9   | 26/36           |
| 3755                                                                                                                  | K.NNDQLTFLETQVAK.I                  | 1620.82275 | 0.00017  | 2 | 1.62E-05 | 5.07   | 0.48     | 1680.3   | 21/26           |
| 1497                                                                                                                  | K.YGAEQGVGSADSNTK.L                 | 1483.66589 | -0.00459 | 2 | 3.53E-08 | 4.78   | 0.62     | 1666.7   | 24/28           |
| 3875                                                                                                                  | K.DFTQTNALTNLPNLDNK.K               | 1918.95044 | 0.00188  | 2 | 2.35E-10 | 4.41   | 0.52     | 1637.3   | 23/32           |
| 3704                                                                                                                  | K.NIVSDALTSEEIK.R                   | 1418.73730 | -0.00031 | 2 | 1.88E-05 | 4.13   | 0.63     | 1237.1   | 19/24           |
| 4607                                                                                                                  | K.SPDSLDFSPMNFNHNK.N                | 1995.92688 | 0.00052  | 3 | 1.58E-08 | 4.04   | 0.43     | 1293.1   | 28/64           |
| 4118                                                                                                                  | K.LFEQIVDQIK.Y                      | 1232.68848 | -0.00032 | 2 | 7.97E-04 | 3.80   | 0.17     | 1490.0   | 15/18           |
| 4132 - 4134                                                                                                           | R.SNNIVALYILK.T                     | 1247.73584 | -0.00068 | 2 | 5.35E-04 | 3.69   | 0.40     | 950.2    | 17/20           |
| 3291                                                                                                                  | K.IDDINNLNIYEHK.E                   | 1600.79651 | -0.00174 | 3 | 6.70E-04 | 3.48   | 0.31     | 1494.2   | 31/48           |
| 3968                                                                                                                  | K.YFDEYFFASGGK.I                    | 1430.62634 | 0.00103  | 2 | 4.44E-05 | 3.40   | 0.57     | 840.9    | 16/22           |
| 3896                                                                                                                  | K.YMTIYINEAYIK.N                    | 1521.76575 | 0.00200  | 2 | 2.58E-04 | 3.37   | 0.51     | 1220.3   | 19/22           |
| 3737                                                                                                                  | K.YLYMDEYLSEGDK.A                   | 1625.70398 | 0.00017  | 2 | 2.99E-07 | 3.28   | 0.62     | 1254.6   | 19/24           |
| 3980                                                                                                                  | K.YIISDDLIVYVNMK.V                  | 1636.79272 | 0.00017  | 2 | 9.79E-07 | 3.20   | 0.55     | 1044.9   | 18/24           |
| 3063                                                                                                                  | K.NSQNYSLTHTEEMIK.I                 | 1794.83264 | -0.00192 | 3 | 6.45E-03 | 3.09   | 0.35     | 555.1    | 22/56           |
| 5822 - 5824                                                                                                           | R.FVYASYILGLVFFIESHIDIAR.L          | 2573.38037 | -0.00030 | 3 | 1.13E-09 | 3.02   | 0.59     | 435.4    | 25/84           |
| 4083                                                                                                                  | K.ELETILNNSPFSEEQTMK.L              | 2110.00098 | 0.00029  | 2 | 2.92E-04 | 2.97   | 0.52     | 319.2    | 15/34           |
| 2835                                                                                                                  | K.YLLDNSNDIKK.V                     | 1322.69507 | -0.00227 | 2 | 2.91E-04 | 2.94   | 0.41     | 1667.1   | 17/20           |
| 4065                                                                                                                  | K.VFNGIPAFLDK.N                     | 1220.66736 | -0.00191 | 2 | 5.16E-03 | 2.54   | 0.26     | 237.4    | 10/20           |
| 3945 - 3947                                                                                                           | K.YNFLDIYK.Q                        | 1075.54590 | -0.00087 | 2 | 3.44E-02 | 2.53   | 0.19     | 452.0    | 10/14           |
| 3373 - 3375                                                                                                           | K.ADSDITYFVK.Q                      | 1158.56775 | -0.00209 | 2 | 1.59E-01 | 2.52   | 0.41     | 681.6    | 13/18           |
| 2996                                                                                                                  | R.IHPNDFLNNK.V                      | 1211.61670 | -0.00337 | 2 | 3.08E-01 | 2.49   | 0.28     | 123.5    | 9/18            |
| 3211                                                                                                                  | K.LMDMELK.H                         | 879.43146  | -0.00118 | 2 | 8.15E-02 | 2.37   | 0.16     | 428.0    | 11/12           |
| 3240                                                                                                                  | K.LPLEDYK.L                         | 1040.52991 | -0.00032 | 2 | 4.75E-03 | 2.28   | 0.46     | 705.5    | 12/14           |
| 4570                                                                                                                  | K.EGNEFLMSILHMK.S                   | 1548.75488 | 0.00127  | 2 | 2.66E-05 | 2.11   | 0.56     | 190.7    | 11/24           |
| 3312                                                                                                                  | K.LSLAPDMVK.T                       | 973.53870  | -0.00405 | 2 | 4.65E-01 | 2.05   | 0.19     | 234.3    | 8/16            |
| 2 psu PF10_0115   organism=Plasmodium_falciparum_3D7   product=QF122 antigen   location=MAL10:455397-458816(+)        |                                     |            |          |   | 1.00E-30 | 190.36 |          | 131545.0 | 19 (19 0 0 0 0) |
| 2088                                                                                                                  | R.SKEEMSNNNNNNSSNGGAFNNSYHESR.Y     | 3203.30640 | 0.00436  | 3 | 1.00E-30 | 6.70   | 0.69     | 1968.0   | 44/112          |
| 3432                                                                                                                  | K.LSLTNNNNMMNNNNNNNNNNNTNFINSYDNK.T | 3944.66553 | 0.00412  | 3 | 6.66E-15 | 6.34   | 0.64     | 1330.1   | 40/132          |
| 4949                                                                                                                  | K.NLEEIEEANTYINYLEEQLSITK.N         | 2756.35132 | 0.00249  | 2 | 1.48E-12 | 6.03   | 0.74     | 1791.3   | 26/44           |
| 4674                                                                                                                  | K.IEIEFISTINSTISR.F                 | 1836.97021 | 0.00115  | 2 | 5.70E-08 | 5.73   | 0.57     | 1539.5   | 22/30           |
| 4842                                                                                                                  | K.DDIEQFISYLQVNFNSENK.N             | 2417.12549 | 0.00144  | 3 | 2.61E-10 | 5.70   | 0.51     | 1678.2   | 37/76           |
| 1608                                                                                                                  | K.NNNNNNNIISNNNNNNNNNSDVKK.D        | 2714.22217 | -0.00241 | 3 | 2.09E-05 | 5.13   | 0.53     | 826.8    | 28/92           |
| 2812                                                                                                                  | K.TSHVAQIYGHEDNIHLAK.D              | 2033.01990 | -0.00584 | 4 | 9.67E-11 | 5.07   | 0.63     | 1608.2   | 42/102          |
| 3691                                                                                                                  | K.DVLENLVQSEGK.E                    | 1330.68494 | 0.00041  | 2 | 1.25E-06 | 4.37   | 0.58     | 2061.1   | 19/22           |

|   |                                   |                                                                                                      |            |          |   |          |        |      |          |                 |
|---|-----------------------------------|------------------------------------------------------------------------------------------------------|------------|----------|---|----------|--------|------|----------|-----------------|
|   | 1960                              | K.NNNNNNNIISNNNNNNNNNSDVK.K                                                                          | 2586.12720 | 0.00498  | 3 | 7.84E-08 | 4.05   | 0.43 | 1418.5   | 36/88           |
|   | 3451                              | K.QNVDITEADIIR.K                                                                                     | 1386.72229 | -0.00044 | 2 | 3.48E-04 | 4.01   | 0.48 | 1283.9   | 20/22           |
|   | 2543                              | R.FNGQTRPINMK.L                                                                                      | 1406.72095 | -0.00142 | 2 | 1.24E-03 | 3.94   | 0.37 | 1172.8   | 16/22           |
|   | 3807                              | K.NLDSEFVPFEEK.E                                                                                     | 1453.68457 | 0.00151  | 2 | 5.98E-06 | 3.56   | 0.60 | 1122.8   | 19/22           |
|   | 2967                              | K.EIETNTNTLIR.M                                                                                      | 1303.68518 | -0.00300 | 2 | 1.39E-04 | 3.12   | 0.47 | 626.0    | 15/20           |
|   | 3859                              | K.LTEEEAFLFNSNYR.G                                                                                   | 1732.81775 | -0.00320 | 3 | 6.40E-03 | 2.94   | 0.33 | 457.8    | 16/52           |
|   | 1756                              | K.NSDIEEAEK.L                                                                                        | 1163.50623 | 0.00029  | 2 | 5.79E-05 | 2.71   | 0.44 | 684.4    | 15/18           |
|   | 3516                              | K.ALEILEYSK.N                                                                                        | 1065.58264 | -0.00264 | 2 | 3.32E-03 | 2.68   | 0.40 | 724.1    | 12/16           |
|   | 3003                              | K.YFVYVDNNK.L                                                                                        | 1161.55750 | -0.00399 | 2 | 9.82E-02 | 2.61   | 0.45 | 651.0    | 13/16           |
|   | 3728                              | K.VIALLSSK.A                                                                                         | 943.61865  | -0.00129 | 2 | 1.30E-03 | 2.47   | 0.30 | 598.3    | 13/16           |
|   | 1899                              | K.LSSADMENK.C                                                                                        | 994.45099  | -0.00142 | 2 | 5.37E-03 | 2.21   | 0.12 | 575.2    | 12/16           |
| 3 | psu PFD0685c                      | organism=Plasmodium_falciparum_3D7   product=chromosome associated protein, putative   location=MA   |            |          |   | 6.84E-09 | 140.29 |      | 141136.4 | 14 (14 0 0 0 0) |
|   | 5066 - 5068                       | R.ENILGFLIDNINVDK.T                                                                                  | 1716.91663 | 0.00108  | 2 | 1.11E-07 | 5.67   | 0.45 | 2746.2   | 24/28           |
|   | 2217                              | K.TQDEDNHLNLSNNK.S                                                                                   | 1755.78918 | -0.00105 | 2 | 6.84E-09 | 5.15   | 0.48 | 1868.2   | 23/28           |
|   | 3157                              | R.IIDEEVYIDK.I                                                                                       | 1236.63586 | -0.00202 | 2 | 3.80E-04 | 3.83   | 0.37 | 782.8    | 16/18           |
|   | 4222                              | R.LNILMNDFNELK.K                                                                                     | 1463.75623 | 0.00187  | 2 | 5.23E-05 | 3.71   | 0.49 | 1504.7   | 19/22           |
|   | 2803                              | K.ISEGTTLNEIK.C                                                                                      | 1318.68494 | -0.00289 | 2 | 3.63E-04 | 3.57   | 0.40 | 1213.5   | 16/22           |
|   | 3809                              | K.LSNMKDEEILNYLK.S                                                                                   | 1709.87781 | 0.00021  | 3 | 3.77E-04 | 3.48   | 0.31 | 1067.4   | 25/52           |
|   | 2668                              | K.YGSEINELNNK.S                                                                                      | 1280.61169 | -0.00288 | 2 | 7.63E-04 | 3.48   | 0.41 | 1247.8   | 18/20           |
|   | 4124                              | K.VHLDYFLNEINYK.N                                                                                    | 1667.84277 | -0.00246 | 3 | 5.93E-03 | 3.24   | 0.29 | 983.7    | 20/48           |
|   | 3917                              | K.NINQINEFILR.V                                                                                      | 1373.75354 | -0.00020 | 2 | 4.19E-05 | 3.07   | 0.36 | 919.8    | 15/20           |
|   | 4140                              | K.VLLPQGIQELEEYR.T                                                                                   | 1686.90613 | 0.00175  | 2 | 4.80E-06 | 2.97   | 0.54 | 398.8    | 16/26           |
|   | 2444                              | K.KKDEALEATYVK.I                                                                                     | 1394.75256 | -0.00161 | 3 | 7.56E-03 | 2.73   | 0.40 | 976.0    | 21/44           |
|   | 4455                              | K.LTIVPLLNIK.K                                                                                       | 1123.74487 | 0.00249  | 2 | 2.85E-04 | 2.71   | 0.31 | 644.9    | 16/18           |
|   | 2531                              | K.IRNEYDDFK.N                                                                                        | 1199.56909 | -0.00006 | 3 | 1.64E-03 | 2.65   | 0.39 | 987.7    | 19/32           |
|   | 3539                              | K.NNEINMLLSK.N                                                                                       | 1175.60889 | 0.00188  | 2 | 4.17E-02 | 2.56   | 0.38 | 764.0    | 13/18           |
| 4 | psu PFC0120w                      | organism=Plasmodium_falciparum_3D7   product=Cytoadherence linked asexual protein, 3.2   location=MA |            |          |   | 1.14E-06 | 136.22 |      | 167134.0 | 14 (12 2 0 0 0) |
|   | 3573 - 3575                       | K.YGYLGEVIAAR.L                                                                                      | 1211.64185 | 0.00175  | 2 | 8.08E-06 | 4.39   | 0.52 | 1416.1   | 18/20           |
|   | 3165 - 3167                       | K.EQSIEIYNSDISDK.I                                                                                   | 1640.76501 | 0.00054  | 2 | 6.39E-02 | 3.87   | 0.52 | 1033.5   | 19/26           |
|   | 1422 - 1424                       | K.EQTQHVQEQTYSR.K                                                                                    | 1675.76709 | 0.00133  | 2 | 3.04E-06 | 3.80   | 0.57 | 738.4    | 17/24           |
|   | 3979                              | K.SALEELNNVFTNK.E                                                                                    | 1478.74854 | -0.00032 | 2 | 1.14E-06 | 3.57   | 0.49 | 1646.9   | 18/24           |
|   | 3468                              | K.HIPNNLVDELEK.L                                                                                     | 1420.74304 | 0.00017  | 2 | 1.46E-05 | 3.32   | 0.45 | 320.6    | 15/22           |
|   | 3784                              | K.TVVVTNYWYPSPIK.K                                                                                   | 1567.81555 | 0.00127  | 2 | 6.12E-06 | 3.18   | 0.54 | 834.6    | 17/24           |
|   | 2577                              | K.YHNIYNINNK.L                                                                                       | 1292.63818 | -0.00056 | 2 | 4.38E-06 | 3.18   | 0.44 | 1018.4   | 16/18           |
|   | 3171                              | K.QGTEQLIDISK.F                                                                                      | 1231.65283 | -0.00154 | 2 | 7.91E-03 | 2.79   | 0.34 | 384.2    | 15/20           |
|   | 3492                              | K.ILEFSMSDR.F                                                                                        | 1097.52954 | -0.00215 | 2 | 1.53E-04 | 2.73   | 0.49 | 635.0    | 13/16           |
|   | 3367                              | K.DSNLLNNITK.C                                                                                       | 1131.60046 | -0.00190 | 2 | 4.40E-04 | 2.66   | 0.40 | 859.5    | 14/18           |
|   | 3773 - 3775                       | R.SYPLSLVLEHK.F                                                                                      | 1285.71509 | -0.00203 | 2 | 4.85E-03 | 2.55   | 0.53 | 160.1    | 11/20           |
|   | 2905                              | R.RYDMENAFK.N                                                                                        | 1173.53577 | -0.00215 | 2 | 9.83E-05 | 2.52   | 0.42 | 1118.3   | 14/16           |
|   | 2641                              | R.EIEIHNSMASR.Y                                                                                      | 1286.61572 | -0.00056 | 2 | 4.35E-03 | 2.13   | 0.30 | 406.8    | 16/20           |
|   | 3352                              | K.TTQDTDFDLHGMMEHK.Y                                                                                 | 1905.81055 | -0.00279 | 4 | 4.22E-01 | 2.05   | 0.13 | 337.0    | 22/90           |
| 5 | gij 81175178 sp P35527 K1C9_HUMAN | Keratin, type I cytoskeletal 9 (Cytokeratin-9) (CK-9) (Keratin-9) (K9)                               |            |          |   | 1.71E-13 | 130.34 |      | 62091.8  | 13 (13 0 0 0 0) |

|   |                                      |                                                                                                     |            |          |   |          |        |      |          |                 |
|---|--------------------------------------|-----------------------------------------------------------------------------------------------------|------------|----------|---|----------|--------|------|----------|-----------------|
|   | 1322                                 | R.GSRGGSGSYGGGSGGGYGGGSGSR.G                                                                        | 2091.88232 | 0.00443  | 3 | 9.47E-10 | 6.87   | 0.56 | 3083.2   | 45/100          |
|   | 1349                                 | R.GGSGGSYGGGSGGGYGGGSGSR.G                                                                          | 1791.72766 | 0.00444  | 2 | 1.71E-13 | 5.80   | 0.77 | 2133.3   | 28/44           |
|   | 3767                                 | R.GGGGSFGYSYGGGSGGGFSASSLGGGFGGGSR.G                                                                | 2705.16113 | -0.00051 | 3 | 1.07E-07 | 5.76   | 0.67 | 1399.3   | 39/124          |
|   | 2916                                 | K.VQALEEANNDLENK.I                                                                                  | 1586.76562 | 0.00030  | 2 | 6.99E-06 | 5.23   | 0.39 | 2830.0   | 23/26           |
|   | 1373                                 | R.GGSGGSYGRGSRGGSGGSYGGGSGGGYGGGSGSR.G                                                              | 2870.21802 | 0.00283  | 4 | 4.53E-06 | 4.70   | 0.56 | 2138.9   | 55/204          |
|   | 3837                                 | K.TLNDMRQEYEQLIAK.N                                                                                 | 1851.92688 | 0.00359  | 2 | 1.63E-05 | 3.92   | 0.36 | 1632.7   | 20/28           |
|   | 4661                                 | K.SDLEMQYETLQEELMALK.K                                                                              | 2171.02466 | -0.00192 | 3 | 1.14E-06 | 3.64   | 0.45 | 808.8    | 24/68           |
|   | 1891                                 | R.SGGGGGGGLGSGGSIR.S                                                                                | 1232.59778 | -0.00117 | 2 | 4.41E-06 | 3.48   | 0.48 | 926.5    | 18/30           |
|   | 3851                                 | R.LASYLDKQALEEANNDLENK.I                                                                            | 2377.18823 | 0.00394  | 3 | 8.37E-02 | 3.42   | 0.37 | 710.9    | 26/80           |
|   | 1525                                 | R.FSSSSGYGGGSSR.V                                                                                   | 1235.52869 | -0.00289 | 2 | 3.37E-07 | 3.03   | 0.64 | 1461.0   | 19/24           |
|   | 2357                                 | K.IGLGGRGGSGGSYGR.G                                                                                 | 1350.68726 | 0.00187  | 2 | 1.59E-02 | 2.95   | 0.38 | 585.6    | 17/28           |
|   | 3177                                 | R.IKFEMEQLNR.Q                                                                                      | 1307.67761 | -0.00118 | 3 | 7.56E-05 | 2.71   | 0.25 | 812.5    | 19/36           |
|   | 2980                                 | R.QGVDADINGLR.Q                                                                                     | 1157.59094 | -0.00398 | 2 | 1.91E-03 | 2.56   | 0.35 | 438.4    | 13/20           |
| 6 | psu PF11_0317                        | organism=Plasmodium_falciparum_3D7   product=structural maintenance of chromosome protein, putative |            |          |   | 4.12E-09 | 120.28 |      | 214541.8 | 12 (12 0 0 0 0) |
|   | 2303                                 | K.NMENDKINNEKENMEK.E                                                                                | 2094.90674 | 0.01169  | 3 | 4.12E-09 | 5.62   | 0.43 | 2097.6   | 34/64           |
|   | 2723                                 | K.MNSHIDQQDNESNVHLNENIK.K                                                                           | 2721.22803 | -0.00181 | 4 | 3.54E-06 | 5.12   | 0.41 | 1777.6   | 45/132          |
|   | 3713                                 | K.EESLQFEQDILNQNK.K                                                                                 | 1834.88171 | 0.00017  | 2 | 5.19E-06 | 4.34   | 0.52 | 1557.7   | 19/28           |
|   | 3608                                 | K.NLNNLNQELNQLR.D                                                                                   | 1582.82959 | 0.00212  | 2 | 3.89E-05 | 3.96   | 0.59 | 1777.6   | 20/24           |
|   | 3697                                 | K.NNNLIIDITNR.Y                                                                                     | 1299.70154 | 0.00127  | 2 | 8.90E-04 | 3.60   | 0.34 | 1314.5   | 17/20           |
|   | 2772                                 | K.LAYDQLNER.I                                                                                       | 1121.55859 | -0.00276 | 2 | 5.22E-05 | 3.14   | 0.42 | 1031.5   | 15/16           |
|   | 3481                                 | K.KFELLDTYEK.E                                                                                      | 1285.66748 | 0.00005  | 2 | 1.01E-04 | 2.97   | 0.39 | 1277.3   | 16/18           |
|   | 4495 - 4497                          | R.MDFIPYENFVSNLK.K                                                                                  | 1716.83020 | 0.00194  | 2 | 2.85E-05 | 2.94   | 0.50 | 465.4    | 18/26           |
|   | 2181                                 | K.ESNEQIDNIQK.I                                                                                     | 1317.62805 | -0.00251 | 2 | 1.90E-03 | 2.76   | 0.32 | 899.4    | 15/20           |
|   | 3793                                 | K.FMENLNLQIK.E                                                                                      | 1249.66089 | -0.00093 | 2 | 9.01E-04 | 2.61   | 0.35 | 763.2    | 15/18           |
|   | 1725                                 | K.VMENYEQK.I                                                                                        | 1040.47168 | -0.00374 | 2 | 1.64E-03 | 2.26   | 0.30 | 469.9    | 12/14           |
|   | 2413                                 | K.NEESINEENIK.K                                                                                     | 1318.61206 | -0.00215 | 2 | 5.66E-03 | 2.17   | 0.14 | 1157.1   | 17/20           |
| 7 | gj 11935049 gb AAG41947.1 AF304164_1 | keratin 1 [Homo sapiens]                                                                            |            |          |   | 3.31E-13 | 110.33 |      | 66027.0  | 11 (11 0 0 0 0) |
|   | 3349                                 | K.SKAEAESLYQSKYEELQITAGR.H                                                                          | 2501.25171 | -0.00229 | 3 | 7.99E-09 | 6.68   | 0.60 | 2262.4   | 40/84           |
|   | 1828                                 | R.GGGGGGYGSGGSSYSGGGSYGSGGGGGGGR.G                                                                  | 2383.95190 | 0.00493  | 2 | 3.31E-13 | 6.17   | 0.75 | 1402.6   | 27/60           |
|   | 5042                                 | R.SLDLDSIIAEVKAQYEDIAQK.S                                                                           | 2349.21851 | 0.00151  | 2 | 1.14E-10 | 5.50   | 0.63 | 1863.6   | 25/40           |
|   | 3439                                 | K.LNDLEDALQQAK.E                                                                                    | 1357.69580 | -0.00081 | 2 | 8.28E-07 | 5.11   | 0.38 | 2311.5   | 20/22           |
|   | 2048                                 | K.SKAEAESLYQSK.Y                                                                                    | 1340.66919 | -0.00166 | 2 | 6.31E-07 | 4.76   | 0.46 | 1425.7   | 19/22           |
|   | 2789                                 | R.TNAENEFVTIKK.D                                                                                    | 1393.73218 | -0.00313 | 2 | 1.60E-05 | 3.75   | 0.56 | 1614.2   | 18/22           |
|   | 4434                                 | R.SLDLDSIIAEVK.A                                                                                    | 1302.71509 | 0.00127  | 2 | 4.21E-04 | 3.47   | 0.28 | 1138.3   | 16/22           |
|   | 3169                                 | K.NMQDMVEDYR.N                                                                                      | 1300.52966 | -0.00202 | 2 | 3.94E-03 | 3.29   | 0.57 | 1118.3   | 14/18           |
|   | 2211                                 | K.AQYEDIAQK.S                                                                                       | 1065.52112 | 0.01384  | 2 | 8.03E-03 | 3.22   | 0.35 | 500.5    | 13/16           |
|   | 1713                                 | R.LRSEIDNVKK.Q                                                                                      | 1201.68994 | -0.00384 | 3 | 2.99E-01 | 3.08   | 0.19 | 1179.9   | 22/36           |
|   | 2948                                 | R.DYQELMNTK.L                                                                                       | 1141.51941 | -0.00313 | 2 | 8.04E-03 | 2.07   | 0.46 | 723.9    | 13/16           |
| 8 | psu PFI0265c                         | organism=Plasmodium_falciparum_3D7   product=RhopH3   location=MAL9:270738-274787(-)   length=897   |            |          |   | 9.64E-10 | 110.31 |      | 104789.1 | 11 (11 0 0 0 0) |
|   | 3216                                 | R.KQDVLYETDKPQTMDEASYEETVDEDAAHVNEK.Q                                                               | 3893.72949 | 0.00202  | 5 | 9.64E-10 | 5.96   | 0.65 | 2196.3   | 57/256          |
|   | 3281 - 3283                          | K.TKDQDLEIELYK.Y                                                                                    | 1494.76868 | 0.00157  | 2 | 2.39E-06 | 4.61   | 0.47 | 1521.4   | 19/22           |
|   | 4021                                 | K.NYLDVQNLDTFCFK.K                                                                                  | 1788.81091 | 0.00127  | 2 | 4.38E-08 | 4.28   | 0.65 | 1274.2   | 21/28           |

|    |                                                                                                                    |                            |            |          |   |          |        |      |          |                 |
|----|--------------------------------------------------------------------------------------------------------------------|----------------------------|------------|----------|---|----------|--------|------|----------|-----------------|
|    | 2361                                                                                                               | K.EDNSEIQCQNV.R.K          | 1434.62781 | 0.00334  | 2 | 1.84E-04 | 3.62   | 0.49 | 1177.7   | 18/22           |
|    | 3597 - 3599                                                                                                        | K.ELSHNITDFSK.E            | 1437.70093 | 0.00291  | 2 | 1.24E-04 | 3.54   | 0.50 | 682.9    | 17/22           |
|    | 4308 - 4310                                                                                                        | R.TMYLDFESSDIFSR.E         | 1710.76794 | 0.00298  | 2 | 1.28E-08 | 3.20   | 0.63 | 770.2    | 18/26           |
|    | 2143                                                                                                               | K.YQLNKEEYK.V              | 1214.60522 | -0.00019 | 2 | 4.01E-04 | 3.08   | 0.33 | 979.8    | 14/16           |
|    | 4239                                                                                                               | R.LFFTYNFGDVEPQGK.Y        | 1761.84827 | 0.00261  | 2 | 1.32E-07 | 2.93   | 0.41 | 584.6    | 15/28           |
|    | 3408                                                                                                               | K.ASLHVPSVLYR.R            | 1241.70007 | -0.00121 | 3 | 1.20E-01 | 2.62   | 0.34 | 713.6    | 19/40           |
|    | 4138                                                                                                               | R.SWVSEFLK.E               | 995.51965  | -0.00093 | 2 | 3.92E-02 | 2.61   | 0.12 | 337.5    | 10/14           |
|    | 2652                                                                                                               | R.YTSLYIHK.F               | 1024.54626 | -0.00361 | 2 | 1.49E-02 | 2.47   | 0.42 | 466.2    | 11/14           |
| 9  | psu PFF0835w   organism=Plasmodium_falciparum_3D7   product=hypothetical protein, conserved   location=MAL6:717047 |                            |            |          |   | 7.16E-08 | 110.30 |      | 52947.8  | 11 (11 0 0 0 0) |
|    | 3335                                                                                                               | K.IENEASKYDDEIVPLK.S       | 1963.98584 | -0.00265 | 3 | 7.16E-08 | 6.03   | 0.57 | 1690.0   | 33/64           |
|    | 5198                                                                                                               | R.EELALIENMLAYLK.K         | 1649.88184 | 0.00078  | 2 | 9.21E-07 | 5.02   | 0.45 | 2433.9   | 23/26           |
|    | 3719                                                                                                               | K.LLINQIQALNK.N            | 1267.77319 | -0.00044 | 2 | 2.28E-05 | 4.62   | 0.44 | 1651.9   | 18/20           |
|    | 2289 - 2291                                                                                                        | K.LKELQNSYQEK.N            | 1379.71655 | 0.01128  | 2 | 1.09E-04 | 3.69   | 0.36 | 1081.4   | 16/20           |
|    | 3609                                                                                                               | K.KLEDIDVLPYR.E            | 1360.74707 | 0.00139  | 2 | 8.68E-05 | 3.63   | 0.46 | 1687.6   | 16/20           |
|    | 3079                                                                                                               | K.QIGFENEEDIEK.K           | 1450.66968 | -0.00069 | 2 | 4.11E-03 | 3.62   | 0.49 | 1159.4   | 17/22           |
|    | 3152                                                                                                               | K.LGSISQSIDEIK.K           | 1417.78967 | 0.00078  | 2 | 3.70E-07 | 3.62   | 0.36 | 819.9    | 17/24           |
|    | 3363                                                                                                               | K.LGSISQSIDEIK.K           | 1289.69470 | -0.00325 | 2 | 1.45E-02 | 3.38   | 0.48 | 1192.0   | 19/22           |
|    | 2911                                                                                                               | K.IEKPDFDAYNEK.L           | 1468.69543 | -0.00105 | 2 | 6.65E-05 | 2.89   | 0.31 | 429.9    | 15/22           |
|    | 3313                                                                                                               | K.YDDEIVPLK.S              | 1192.60962 | -0.00264 | 2 | 6.48E-04 | 2.82   | 0.52 | 1033.9   | 14/18           |
|    | 2568                                                                                                               | R.RSITVEMEEK.K             | 1221.61438 | -0.00056 | 2 | 6.29E-04 | 2.77   | 0.34 | 897.8    | 16/18           |
| 10 | psu PF14_0316   organism=Plasmodium_falciparum_3D7   product=DNA topoisomerase II, putative   location=MAL14:1332  |                            |            |          |   | 1.79E-08 | 110.24 |      | 169121.8 | 11 (11 0 0 0 0) |
|    | 1948                                                                                                               | K.NNNNNNNNDEDEIVK.I        | 1873.79065 | 0.00554  | 2 | 1.79E-08 | 4.83   | 0.39 | 1231.2   | 24/30           |
|    | 4779                                                                                                               | K.SPILSNILLWAQAK.A         | 1553.90503 | 0.00261  | 2 | 6.05E-07 | 4.02   | 0.43 | 1657.3   | 18/26           |
|    | 3995                                                                                                               | K.STLTTTNTLFDPNLK.L        | 1796.90991 | 0.00066  | 2 | 3.72E-07 | 3.61   | 0.63 | 1500.5   | 20/30           |
|    | 4444 - 4446                                                                                                        | K.GFLSEFVPIVK.V            | 1336.75110 | -0.00301 | 2 | 5.07E-05 | 3.09   | 0.58 | 1015.7   | 16/22           |
|    | 3399                                                                                                               | R.ISVYNDGEGIPVDIHK.E       | 1755.89124 | -0.00229 | 3 | 1.58E-02 | 3.04   | 0.41 | 463.4    | 23/60           |
|    | 4288 - 4290                                                                                                        | K.EFLEELLTDEK.H            | 1365.67834 | -0.00037 | 2 | 8.84E-04 | 2.86   | 0.37 | 741.4    | 12/20           |
|    | 3632                                                                                                               | R.YGSLMIMTDQDYDGSHIK.G     | 2073.92554 | -0.00052 | 3 | 4.03E-02 | 2.78   | 0.42 | 482.8    | 21/68           |
|    | 3663                                                                                                               | K.DLSYYDFVNK.E             | 1263.58923 | -0.00080 | 2 | 7.09E-04 | 2.75   | 0.48 | 971.4    | 15/18           |
|    | 4157                                                                                                               | K.IMFLWTGDR.D              | 1138.57141 | -0.00081 | 2 | 2.66E-04 | 2.61   | 0.37 | 741.0    | 13/16           |
|    | 2756                                                                                                               | K.VTFKPDLNK.F              | 1061.59900 | -0.00337 | 2 | 3.68E-02 | 2.59   | 0.28 | 332.9    | 10/16           |
|    | 3551                                                                                                               | R.IMGLDITDK.N              | 1005.52850 | 0.00274  | 2 | 3.36E-03 | 2.34   | 0.29 | 473.8    | 14/16           |
| 11 | psu PFF1185w   organism=Plasmodium_falciparum_3D7   product=iswi protein homologue   location=MAL6:999525-100768   |                            |            |          |   | 6.26E-12 | 100.37 |      | 315421.1 | 10 (10 0 0 0 0) |
|    | 3916                                                                                                               | R.RPLVDNVQLKPHQEDGVEWLLK.S | 2613.41479 | 0.00112  | 4 | 6.26E-12 | 7.31   | 0.51 | 4347.0   | 53/126          |
|    | 4392                                                                                                               | K.IEALENSPLFMEIYNK.G       | 1910.95679 | 0.00358  | 2 | 1.80E-08 | 5.39   | 0.62 | 2069.4   | 23/30           |
|    | 2045                                                                                                               | K.GIEYNKNDDDYNNNESK.D      | 2160.89526 | 0.04404  | 3 | 3.57E-07 | 4.66   | 0.51 | 1870.5   | 32/68           |
|    | 3252                                                                                                               | R.IDALDQQYEDQLR.K          | 1606.77075 | 0.00054  | 2 | 2.84E-06 | 4.49   | 0.52 | 2093.3   | 19/24           |
|    | 2341                                                                                                               | K.INEDSTVGVTDK.G           | 1277.62195 | 0.00053  | 2 | 3.26E-06 | 4.31   | 0.52 | 1814.0   | 20/22           |
|    | 4804                                                                                                               | K.AAIQNMDVESTNFPLEFFIER.G  | 2585.23413 | 0.00229  | 3 | 1.68E-09 | 4.22   | 0.54 | 950.9    | 33/84           |
|    | 1717                                                                                                               | K.NISGEEHIESSK.L           | 1416.66016 | -0.00313 | 2 | 1.17E-07 | 4.01   | 0.60 | 1256.5   | 20/24           |
|    | 3360                                                                                                               | K.GVGTTFSLDGSMT.F          | 1327.63110 | -0.00202 | 2 | 2.41E-05 | 3.94   | 0.54 | 1603.7   | 19/24           |
|    | 3580                                                                                                               | K.VNVNIGNIDLK.S            | 1198.67896 | 0.00139  | 2 | 1.09E-02 | 2.99   | 0.35 | 879.0    | 15/20           |

|    |                                                                                                                    |                                  |            |          |   |          |        |      |          |                 |
|----|--------------------------------------------------------------------------------------------------------------------|----------------------------------|------------|----------|---|----------|--------|------|----------|-----------------|
|    | 3689                                                                                                               | K.AYENVFPNNFVK.E                 | 1441.71106 | -0.00142 | 2 | 2.31E-02 | 2.28   | 0.31 | 269.9    | 12/22           |
| 12 | psu PF13_0305   organism=Plasmodium_falciparum_3D7   product=elongation factor 1 alpha   location=MAL13:2265234-22 |                                  |            |          |   | 1.03E-12 | 100.32 |      | 48927.9  | 10 (10 0 0 0 0) |
|    | 4348 - 4350                                                                                                        | K.VGYQADKVDPIPIISGFEGDNLIEK.S    | 2654.33472 | 0.00131  | 3 | 1.03E-12 | 6.40   | 0.51 | 1691.9   | 37/92           |
|    | 3401                                                                                                               | K.EVLEE ARP GDNIGFNVK.N          | 1886.96069 | 0.00005  | 2 | 3.10E-07 | 5.55   | 0.55 | 961.9    | 19/32           |
|    | 4852                                                                                                               | K.NMITGTSQADVALLVPAEVGGFEGAFSK.E | 2908.47607 | 0.00138  | 3 | 4.01E-11 | 5.06   | 0.64 | 1420.8   | 39/112          |
|    | 4418                                                                                                               | K.VDFIPISGFEGDNLIEK.S            | 1892.96399 | -0.00020 | 2 | 4.38E-07 | 5.03   | 0.52 | 1089.0   | 25/32           |
|    | 3649                                                                                                               | K.FTAQVILNHPGEIK.N               | 1679.94788 | 0.00017  | 2 | 7.22E-09 | 4.95   | 0.49 | 2321.3   | 23/28           |
|    | 3791                                                                                                               | K.KPMVVETFTTEYPPLGR.F            | 1863.96729 | 0.00065  | 2 | 6.41E-09 | 4.24   | 0.66 | 1622.7   | 22/30           |
|    | 3739                                                                                                               | R.YFFTVIDAPGHK.D                 | 1394.71033 | -0.00085 | 3 | 4.85E-06 | 3.84   | 0.46 | 879.9    | 26/44           |
|    | 3227                                                                                                               | K.SGDSALVSLEPK.K                 | 1202.62634 | 0.00127  | 2 | 2.42E-04 | 3.23   | 0.50 | 1627.2   | 18/22           |
|    | 1896                                                                                                               | K.YSEDRYEEIKK.E                  | 1459.70630 | 0.00957  | 2 | 1.95E-02 | 2.44   | 0.17 | 463.0    | 12/20           |
|    | 3015                                                                                                               | K.FLNIDSK.I                      | 836.45123  | -0.00025 | 2 | 1.69E-01 | 2.40   | 0.14 | 510.1    | 10/12           |
| 13 | psu MAL7P1.229   organism=Plasmodium_falciparum_3D7   product=Cytoadherence linked asexual protein   location=MAL  |                                  |            |          |   | 4.81E-09 | 100.21 |      | 162677.5 | 10 (10 0 0 0 0) |
|    | 3692                                                                                                               | R.NILNVDEVNK.S                   | 1256.68445 | 0.00005  | 2 | 1.02E-04 | 3.59   | 0.50 | 1227.1   | 17/20           |
|    | 5239                                                                                                               | K.NVDDILFFADIINIR.K              | 1777.94836 | 0.00103  | 2 | 1.33E-06 | 3.48   | 0.47 | 1904.8   | 19/28           |
|    | 3295                                                                                                               | R.AHPLSLILEHK.F                  | 1257.73132 | -0.00112 | 3 | 2.86E-03 | 3.40   | 0.19 | 618.4    | 23/40           |
|    | 4464                                                                                                               | K.HLPNNLLDELLR.Q                 | 1446.80640 | -0.00020 | 2 | 3.69E-07 | 3.11   | 0.57 | 329.2    | 15/22           |
|    | 3001                                                                                                               | K.GEAILGDTK.I                    | 1016.56226 | -0.00276 | 2 | 9.92E-03 | 3.03   | 0.38 | 1207.2   | 14/18           |
|    | 4645                                                                                                               | K.SINDADDDIYIVPTIQSSFYDIK.Y      | 2703.30347 | 0.00174  | 3 | 3.46E-04 | 3.01   | 0.39 | 365.2    | 22/92           |
|    | 3883                                                                                                               | K.EQSIESYNANISDLIK.K             | 1823.90210 | 0.00078  | 2 | 4.81E-09 | 2.99   | 0.63 | 919.2    | 20/30           |
|    | 3032                                                                                                               | K.IALEELNK.V                     | 929.53021  | -0.00196 | 2 | 8.41E-03 | 2.73   | 0.20 | 530.9    | 12/14           |
|    | 3256                                                                                                               | R.GYLDEAMEAR.I                   | 1154.51465 | 0.00005  | 2 | 2.83E-03 | 2.68   | 0.47 | 832.9    | 13/18           |
|    | 2545                                                                                                               | R.LLNSHSETFR.N                   | 1203.61169 | -0.00251 | 2 | 2.09E-05 | 2.46   | 0.41 | 907.7    | 15/18           |
| 14 | gij 40354192 ref NP_000412.2  keratin 10 [Homo sapiens]                                                            |                                  |            |          |   | 1.88E-10 | 90.27  |      | 58791.5  | 9 (9 0 0 0 0)   |
|    | 3463                                                                                                               | K.GSLGGGFSSGGFSGGSFSR.G          | 1707.77209 | 0.00164  | 2 | 1.88E-10 | 5.42   | 0.66 | 1511.5   | 23/36           |
|    | 2799                                                                                                               | R.ALEESNYELEGK.I                 | 1381.64819 | -0.00312 | 2 | 3.59E-06 | 4.20   | 0.61 | 2051.2   | 19/22           |
|    | 2648                                                                                                               | R.LENEIQTYR.S                    | 1165.58484 | -0.00471 | 2 | 7.77E-04 | 4.17   | 0.13 | 1226.0   | 15/16           |
|    | 2257                                                                                                               | R.SQYEQLAEQNRK.D                 | 1493.73425 | 0.03045  | 2 | 8.68E-04 | 3.87   | 0.42 | 1228.2   | 16/22           |
|    | 4694                                                                                                               | R.NVSTGDVNVEMNAAPGVDLTQLLNMR.S   | 2872.39282 | 0.00333  | 3 | 5.96E-07 | 3.66   | 0.48 | 888.2    | 30/104          |
|    | 2475                                                                                                               | R.SLLEGE GSSGGGR.G               | 1262.59717 | -0.00179 | 2 | 2.14E-06 | 3.60   | 0.44 | 1331.2   | 21/26           |
|    | 2476                                                                                                               | R.SQYEQLAEQNRK.K                 | 1365.63928 | -0.00129 | 2 | 1.83E-04 | 3.41   | 0.49 | 1423.6   | 16/20           |
|    | 3105                                                                                                               | K.QSLEASLAETEGR.Y                | 1390.68091 | -0.00081 | 2 | 1.45E-06 | 3.08   | 0.58 | 576.6    | 17/24           |
|    | 3577                                                                                                               | R.SQYEQLAEQNRKDAEAWFNEK.S        | 2584.20630 | 0.00429  | 4 | 2.03E-03 | 1.96   | 0.37 | 254.6    | 27/120          |
| 15 | psu PF14_0359   organism=Plasmodium_falciparum_3D7   product=hypothetical protein, conserved   location=MAL14:1533 |                                  |            |          |   | 6.66E-15 | 80.39  |      | 48438.4  | 8 (8 0 0 0 0)   |
|    | 5056                                                                                                               | R.KLYDEYGEENGEQPADATDLDFILNAGK.G | 3561.65430 | 0.01108  | 3 | 6.66E-15 | 7.88   | 0.75 | 2438.7   | 44/124          |
|    | 2483                                                                                                               | K.QQQQQQAEYDDEDHQPEMEGGR.V       | 2774.13428 | -0.08151 | 3 | 9.04E-08 | 4.70   | 0.67 | 456.4    | 21/88           |
|    | 5135                                                                                                               | K.LYDEYGEENGEQPADATDLDFILNAGK.G  | 3433.55933 | 0.01713  | 2 | 6.37E-13 | 4.31   | 0.76 | 598.9    | 19/60           |
|    | 3587                                                                                                               | K.VTLEQLYNGATK.K                 | 1336.71069 | 0.00188  | 2 | 1.18E-04 | 3.83   | 0.43 | 829.0    | 15/22           |
|    | 2440                                                                                                               | K.KRGEDIVSEVK.V                  | 1259.69543 | -0.00042 | 3 | 2.40E-06 | 3.58   | 0.37 | 1778.5   | 26/40           |
|    | 3119                                                                                                               | R.EVLDEGMPTYK.D                  | 1281.60315 | -0.00142 | 2 | 5.61E-02 | 2.86   | 0.43 | 399.5    | 11/20           |
|    | 2645                                                                                                               | K.RGEDIVSEVK.V                   | 1131.60046 | -0.00178 | 2 | 3.14E-03 | 2.77   | 0.29 | 674.9    | 14/18           |
|    | 3284                                                                                                               | R.KIEVYIPK.G                     | 1102.68701 | -0.00215 | 2 | 7.58E-03 | 2.32   | 0.23 | 596.1    | 12/16           |

|    |                                                                                                                    |                            |            |          |   |          |       |      |         |               |
|----|--------------------------------------------------------------------------------------------------------------------|----------------------------|------------|----------|---|----------|-------|------|---------|---------------|
| 16 | gij14277739 pdb 1HYN P Chain P, Crystal Structure Of The Cytoplasmic Domain Of Human Erythrocyte Band-3 Protein    |                            |            |          |   | 1.48E-08 | 80.29 |      | 42509.3 | 8 (8 0 0 0 0) |
|    | 3351                                                                                                               | K.HSHAGELEALGGVKAVALTR.S   | 2042.11414 | -0.00255 | 4 | 2.81E-08 | 5.70  | 0.52 | 2442.2  | 51/114        |
|    | 2612                                                                                                               | R.YQSSPAKPDSSFYK.G         | 1604.75916 | 0.00309  | 2 | 1.94E-02 | 4.31  | 0.56 | 1745.5  | 21/26         |
|    | 3684                                                                                                               | K.IPPDSEATLVLVGR.A         | 1466.82129 | -0.00081 | 2 | 1.48E-08 | 3.97  | 0.56 | 745.2   | 22/26         |
|    | 4922                                                                                                               | K.GTVLLDLQETSLAGVANQLLDR.F | 2326.26123 | 0.00200  | 2 | 4.31E-06 | 3.44  | 0.59 | 597.7   | 18/42         |
|    | 4278                                                                                                               | R.LQEAAELEAVELPPIR.F       | 1877.03784 | 0.00298  | 2 | 3.27E-06 | 3.17  | 0.52 | 691.7   | 16/32         |
|    | 4163                                                                                                               | K.VYVELQELVMDEK.N          | 1594.80334 | 0.00298  | 2 | 7.26E-08 | 3.06  | 0.48 | 1198.5  | 19/24         |
|    | 4382                                                                                                               | R.ADFLEQPVLGFVR.L          | 1490.80017 | -0.00007 | 2 | 2.90E-06 | 2.92  | 0.51 | 793.8   | 15/24         |
|    | 2485                                                                                                               | R.IDAYMAQSR.G              | 1054.49866 | -0.00252 | 2 | 1.31E-03 | 2.51  | 0.44 | 1126.7  | 14/16         |
| 17 | psu PF14_0368   organism=Plasmodium_falciparum_3D7   product=2-Cys peroxiredoxin   location=MAL14:1575927-15765    |                            |            |          |   | 1.31E-08 | 80.28 |      | 21793.3 | 8 (8 0 0 0 0) |
|    | 3841                                                                                                               | K.GGIGNIQTHTLISDITK.S      | 1666.91223 | 0.00103  | 2 | 1.31E-08 | 5.59  | 0.57 | 2239.7  | 23/30         |
|    | 4370                                                                                                               | K.AEAVFADNTFGEVNLHDFIGK.K  | 2294.10889 | 0.00082  | 3 | 5.40E-04 | 3.64  | 0.50 | 694.3   | 31/80         |
|    | 3963                                                                                                               | R.SYNVLFGDSVSLR.A          | 1456.74304 | 0.00200  | 2 | 5.95E-06 | 3.32  | 0.43 | 953.4   | 17/24         |
|    | 3832                                                                                                               | K.QGVVQHLLVNNLAIGR.S       | 1731.00244 | 0.00237  | 2 | 1.20E-05 | 3.09  | 0.46 | 650.0   | 18/30         |
|    | 3329                                                                                                               | R.NVELIGCSVDSK.Y           | 1263.62488 | -0.00240 | 2 | 4.50E-05 | 3.08  | 0.36 | 1000.4  | 17/22         |
|    | 3135                                                                                                               | K.VAMKPSEEGVSEYLSK.L       | 1753.86768 | -0.00443 | 3 | 3.69E-02 | 3.00  | 0.31 | 981.9   | 26/60         |
|    | 3311                                                                                                               | R.AFVLIDK.Q                | 805.48181  | -0.00087 | 2 | 4.04E-02 | 2.37  | 0.27 | 428.6   | 10/12         |
|    | 2703                                                                                                               | R.SVEEVLRI                 | 831.45703  | -0.00013 | 2 | 2.86E-01 | 2.29  | 0.15 | 364.2   | 10/12         |
| 18 | psu PF14_0567   organism=Plasmodium_falciparum_3D7   product=hypothetical protein   location=MAL14:2433297-243431  |                            |            |          |   | 5.71E-08 | 80.21 |      | 40043.0 | 8 (8 0 0 0 0) |
|    | 2992                                                                                                               | K.KPKPISVALLNNK.K          | 1421.88391 | -0.00323 | 3 | 9.35E-05 | 4.16  | 0.28 | 1999.5  | 29/48         |
|    | 4213                                                                                                               | K.NIQYNYINDLFVTNK.Y        | 1858.93335 | 0.00285  | 2 | 5.71E-08 | 3.93  | 0.64 | 1403.8  | 19/28         |
|    | 1471                                                                                                               | K.EKEDDHSSSNVTNEVK.K       | 1817.81482 | -0.00044 | 2 | 9.06E-03 | 3.59  | 0.53 | 535.4   | 17/30         |
|    | 4197                                                                                                               | K.YFNISPLIIDNK.R           | 1436.77844 | -0.00103 | 3 | 1.10E-03 | 3.47  | 0.42 | 890.5   | 22/44         |
|    | 2599                                                                                                               | K.NTSIHPVINASR.S           | 1308.70190 | -0.00117 | 2 | 3.06E-04 | 3.21  | 0.42 | 630.4   | 17/22         |
|    | 2351                                                                                                               | K.YIDVSNTEK.L              | 1068.52075 | 0.00042  | 2 | 2.94E-04 | 2.74  | 0.36 | 777.6   | 14/16         |
|    | 1622                                                                                                               | K.EDDHSSSNVTNEVK.K         | 1560.67725 | -0.00130 | 2 | 2.70E-05 | 2.27  | 0.37 | 226.6   | 14/26         |
|    | 2561 - 2563                                                                                                        | K.LSEPPQIK.Y               | 911.51965  | -0.00102 | 2 | 7.84E-02 | 2.18  | 0.29 | 450.4   | 11/14         |
| 19 | psu PF11_0099   organism=Plasmodium_falciparum_3D7   product=heat shock protein DnaJ homologue Pfj2   location=MA  |                            |            |          |   | 1.15E-12 | 70.32 |      | 62337.2 | 7 (7 0 0 0 0) |
|    | 5049                                                                                                               | K.TPSLLLVDIDSLSGDLTQLK.N   | 2243.20166 | 0.00322  | 2 | 1.15E-12 | 6.41  | 0.69 | 2891.1  | 28/40         |
|    | 3685                                                                                                               | K.FVDNVVSGGIPINQNIK.R      | 1813.98071 | -0.00044 | 2 | 9.77E-07 | 3.70  | 0.43 | 624.8   | 21/32         |
|    | 3633 - 3635                                                                                                        | R.TDENLTYFIK.N             | 1243.62048 | -0.00025 | 2 | 1.58E-03 | 3.50  | 0.43 | 1437.0  | 16/18         |
|    | 3379                                                                                                               | K.FVHVEQYDDEL.-            | 1393.62708 | -0.00081 | 2 | 1.35E-04 | 2.92  | 0.48 | 764.8   | 17/20         |
|    | 2740                                                                                                               | K.TYETFYGNR.T              | 1150.51636 | -0.00069 | 2 | 3.27E-02 | 2.21  | 0.20 | 445.9   | 11/16         |
|    | 4447                                                                                                               | K.NFDFNILSLK.L             | 1210.64661 | -0.00325 | 2 | 2.88E-02 | 2.15  | 0.38 | 487.4   | 12/18         |
|    | 2288                                                                                                               | K.SFDEDIKK.V               | 981.48877  | 0.00853  | 2 | 4.07E-01 | 2.10  | 0.21 | 492.8   | 11/14         |
| 20 | psu PF14_0102   organism=Plasmodium_falciparum_3D7   product=rhoptry-associated protein 1, RAP1   location=MAL14:4 |                            |            |          |   | 7.79E-07 | 70.24 |      | 89996.4 | 7 (7 0 0 0 0) |
|    | 3076                                                                                                               | K.TDMLSLQNEESK.I           | 1394.64673 | -0.00056 | 2 | 3.70E-03 | 4.57  | 0.39 | 1357.1  | 19/22         |
|    | 3977                                                                                                               | K.YSLNNMEENINILK.N         | 1694.84180 | 0.00065  | 2 | 7.79E-07 | 4.15  | 0.33 | 1458.9  | 20/26         |
|    | 3901                                                                                                               | K.FHPNIDYLTADGYK.L         | 1766.87476 | -0.00131 | 3 | 6.07E-03 | 3.81  | 0.36 | 1212.7  | 27/56         |
|    | 3823                                                                                                               | K.TFSGIGFNLTEK.E           | 1313.67358 | 0.00115  | 2 | 1.55E-05 | 3.33  | 0.45 | 761.5   | 16/22         |
|    | 4298                                                                                                               | R.TMVTIINDYFEAK.K          | 1544.76648 | -0.00069 | 2 | 7.22E-06 | 3.28  | 0.55 | 1078.2  | 18/24         |
|    | 3073                                                                                                               | K.LHVITSGLSYK.A            | 1217.68884 | -0.00239 | 2 | 2.25E-05 | 3.28  | 0.41 | 980.6   | 17/20         |

|    |                                                                                                         |                                                                                                         |            |          |   |          |      |      |          |               |
|----|---------------------------------------------------------------------------------------------------------|---------------------------------------------------------------------------------------------------------|------------|----------|---|----------|------|------|----------|---------------|
|    | 3155                                                                                                    | R.ESMISTTFEQQK.E                                                                                        | 1428.66748 | -0.00007 | 2 | 1.28E-04 | 3.26 | 0.31 | 959.0    | 17/22         |
| 21 | psu PFF0200c                                                                                            | organism=Plasmodium_falciparum_3D7   product=hypothetical protein, conserved   location=MAL6:171298     |            | 5.23E-07 |   | 70.24    |      |      | 229481.9 | 7 (7 0 0 0 0) |
|    | 3913                                                                                                    | K.SGITFEQLYPDKGPIIVR.V                                                                                  | 2017.07532 | 0.00041  | 2 | 7.00E-07 | 4.73 | 0.60 | 1154.7   | 21/34         |
|    | 3327                                                                                                    | R.EHIGSQEPVILDK.I                                                                                       | 1577.85339 | -0.00068 | 2 | 5.23E-07 | 4.42 | 0.55 | 1863.9   | 21/26         |
|    | 4025 - 4027                                                                                             | R.VFENGVGVNVSLIR.D                                                                                      | 1608.87439 | 0.00170  | 2 | 2.02E-06 | 3.77 | 0.51 | 1591.8   | 21/26         |
|    | 2972                                                                                                    | K.RADTFAQSMIK.G                                                                                         | 1267.64636 | -0.00178 | 2 | 1.73E-05 | 3.71 | 0.34 | 1238.9   | 17/20         |
|    | 3811                                                                                                    | K.GIFNPILLHK.A                                                                                          | 1151.69348 | 0.00029  | 2 | 2.84E-04 | 3.22 | 0.48 | 846.6    | 15/18         |
|    | 3127                                                                                                    | R.ADTFAQSMIK.G                                                                                          | 1111.54517 | -0.00472 | 2 | 2.50E-02 | 3.10 | 0.35 | 776.1    | 14/18         |
|    | 3687                                                                                                    | K.SGITFEQLYPDK.G                                                                                        | 1397.69470 | 0.00017  | 2 | 1.89E-04 | 2.84 | 0.28 | 1497.4   | 18/22         |
| 22 | gij 112798 sp P16452 EPB42_HUMAN Erythrocyte membrane protein band 4.2 (Erythrocyte protein 4.2) (P4.2) |                                                                                                         |            | 3.42E-12 |   | 70.23    |      |      | 76924.7  | 7 (7 0 0 0 0) |
|    | 3259                                                                                                    | R.VLPTPQTQATQEGALLNK.R                                                                                  | 1909.03894 | 0.00029  | 2 | 3.42E-12 | 4.44 | 0.59 | 709.8    | 23/34         |
|    | 2368                                                                                                    | K.VALTAQTGEQPSK.I                                                                                       | 1329.70093 | 0.00078  | 2 | 5.93E-06 | 3.74 | 0.52 | 1708.7   | 18/24         |
|    | 2659                                                                                                    | R.VVTFASAQGTGGR.L                                                                                       | 1351.69641 | -0.00227 | 2 | 1.02E-04 | 3.02 | 0.31 | 775.1    | 20/26         |
|    | 3496                                                                                                    | K.WWSAVVEER.D                                                                                           | 1161.56873 | -0.00045 | 2 | 2.81E-03 | 2.71 | 0.42 | 894.6    | 14/16         |
|    | 2603                                                                                                    | K.WSQPVHVAR.V                                                                                           | 1079.57446 | -0.00068 | 2 | 4.16E-04 | 2.65 | 0.28 | 643.7    | 15/16         |
|    | 2876                                                                                                    | R.NPPENTFLR.L                                                                                           | 1087.55310 | -0.00337 | 2 | 5.96E-04 | 2.47 | 0.31 | 566.4    | 12/16         |
|    | 2024                                                                                                    | K.YPEGLQEKE.E                                                                                           | 1050.51025 | -0.00154 | 2 | 8.64E-02 | 2.05 | 0.23 | 320.3    | 11/16         |
| 23 | psu PF08_0032                                                                                           | organism=Plasmodium_falciparum_3D7   product=DnaJ protein, putative   location=MAL8:1044885-10468       |            | 1.19E-07 |   | 70.22    |      |      | 76633.7  | 7 (7 0 0 0 0) |
|    | 1626                                                                                                    | R.KTYQNINSSYNK.F                                                                                        | 1459.71753 | 0.00273  | 2 | 4.97E-06 | 4.00 | 0.49 | 1214.2   | 16/22         |
|    | 3111                                                                                                    | K.YNEIDNISNESIK.K                                                                                       | 1538.73328 | 0.00126  | 2 | 1.19E-07 | 3.84 | 0.55 | 2008.1   | 22/24         |
|    | 1999                                                                                                    | K.TYQNINSSYNK.F                                                                                         | 1331.62268 | -0.00483 | 2 | 2.10E-05 | 3.54 | 0.32 | 1545.1   | 17/20         |
|    | 4303                                                                                                    | K.NGSEETEEQLFIQPVYVLK.K                                                                                 | 2223.11792 | 0.00071  | 3 | 2.16E-03 | 3.35 | 0.30 | 617.1    | 22/72         |
|    | 4008                                                                                                    | K.ENQNIDYFILVNNQVK.I                                                                                    | 2065.03491 | -0.00190 | 2 | 3.82E-04 | 2.63 | 0.55 | 377.1    | 12/32         |
|    | 2960                                                                                                    | K.MLNDALYK.M                                                                                            | 967.49170  | -0.00270 | 2 | 7.06E-04 | 2.52 | 0.20 | 379.2    | 11/14         |
|    | 3888                                                                                                    | K.DIEILNFQK.I                                                                                           | 1119.60449 | -0.00227 | 2 | 4.18E-03 | 2.44 | 0.18 | 945.3    | 12/16         |
| 24 | psu PFB0895c                                                                                            | organism=Plasmodium_falciparum_3D7   product=replication factor C subunit 1, putative   location=MAL2:7 |            | 1.20E-08 |   | 70.21    |      |      | 104119.9 | 7 (7 0 0 0 0) |
|    | 4336 - 4338                                                                                             | K.NIQSLANPFEITLK.L                                                                                      | 1587.87402 | 0.00078  | 2 | 1.89E-06 | 4.16 | 0.54 | 1213.2   | 20/26         |
|    | 3353                                                                                                    | K.NLNELVGNNQNVIK.L                                                                                      | 1568.83911 | 0.00042  | 2 | 6.52E-08 | 3.54 | 0.58 | 1548.7   | 21/26         |
|    | 2580                                                                                                    | K.AFELQQQNK.S                                                                                           | 1105.56360 | -0.00191 | 2 | 4.90E-03 | 3.24 | 0.33 | 1386.1   | 14/16         |
|    | 2383                                                                                                    | K.LLPQTDQTQENDK.T                                                                                       | 1529.74414 | -0.00105 | 2 | 6.29E-08 | 3.01 | 0.48 | 428.5    | 20/24         |
|    | 4928                                                                                                    | K.WNVFSQIAHDLSLADK.I                                                                                    | 1843.93372 | -0.00089 | 3 | 6.48E-05 | 2.78 | 0.47 | 382.1    | 20/60         |
|    | 2684                                                                                                    | R.LPNQENLYDK.L                                                                                          | 1233.61096 | -0.00166 | 2 | 7.07E-03 | 2.75 | 0.29 | 575.8    | 15/18         |
|    | 3133                                                                                                    | K.TNYLVHGEYLEDGR.L                                                                                      | 1665.78674 | 0.00029  | 2 | 1.20E-08 | 2.17 | 0.29 | 788.1    | 19/26         |
| 25 | gij 27574029 pdb 1N11 A Chain A, D34 Region Of Human Ankyrin-R And Linker [MASS=4                       |                                                                                                         |            | 2.98E-09 |   | 60.31    |      |      | 46366.4  | 6 (6 0 0 0 0) |
|    | 3611                                                                                                    | K.LLLENNANPNLATTAGHTPLHIAAR.E                                                                           | 2622.41113 | 0.00210  | 4 | 2.98E-09 | 6.21 | 0.56 | 3300.1   | 53/144        |
|    | 4291                                                                                                    | K.SGLTPLHLVAQEGHVPVADVLK.H                                                                              | 2393.35522 | 0.00242  | 3 | 2.47E-08 | 5.66 | 0.62 | 1169.9   | 35/88         |
|    | 3149 - 3151                                                                                             | K.NGASPNEVSSDGTPLAIK.R                                                                                  | 1928.95593 | 0.00097  | 2 | 3.48E-09 | 4.53 | 0.64 | 1184.8   | 24/38         |
|    | 4059                                                                                                    | R.LGYISVTDVLK.V                                                                                         | 1207.69324 | -0.00118 | 2 | 1.82E-04 | 3.54 | 0.21 | 956.6    | 17/20         |
|    | 2247                                                                                                    | K.HGVMVDATTR.M                                                                                          | 1086.53601 | 0.02397  | 2 | 4.17E-06 | 3.20 | 0.57 | 1507.3   | 17/18         |
|    | 3083                                                                                                    | R.MGYTPLHVASHYGNK.L                                                                                     | 1787.88977 | -0.00205 | 4 | 3.42E-03 | 2.77 | 0.50 | 937.0    | 37/90         |
| 26 | psu MAL8P1.105                                                                                          | organism=Plasmodium_falciparum_3D7   product=hypothetical protein, conserved   location=MAL8:5618       |            | 2.43E-10 |   | 60.27    |      |      | 133674.9 | 6 (6 0 0 0 0) |
|    | 3925                                                                                                    | K.TYSINLNNENVELFSK.S                                                                                    | 1884.93384 | 0.00127  | 2 | 2.43E-10 | 4.52 | 0.62 | 1935.5   | 23/30         |

|    |                                                                                                                          |                                                                                                   |            |          |   |          |       |      |          |               |
|----|--------------------------------------------------------------------------------------------------------------------------|---------------------------------------------------------------------------------------------------|------------|----------|---|----------|-------|------|----------|---------------|
|    | 4975                                                                                                                     | K.VVNLFDEENIVINETNYIIDHNVK.S                                                                      | 2844.44141 | -0.00133 | 4 | 4.41E-08 | 4.27  | 0.31 | 863.1    | 39/138        |
|    | 3984                                                                                                                     | K.SNFEFMNSLVK.N                                                                                   | 1315.63513 | 0.00127  | 2 | 2.80E-03 | 2.76  | 0.50 | 1091.0   | 16/20         |
|    | 4955 - 4957                                                                                                              | K.DSHILIFDVLNGDIIYEK.K                                                                            | 2104.09619 | 0.00132  | 3 | 4.59E-04 | 2.65  | 0.39 | 801.3    | 22/68         |
|    | 3643                                                                                                                     | K.IAYLPFSNDK.N                                                                                    | 1167.60449 | -0.00178 | 2 | 1.06E-03 | 2.32  | 0.40 | 728.2    | 14/18         |
|    | 3203                                                                                                                     | K.NQVIGYYLNK.E                                                                                    | 1211.64185 | -0.00362 | 2 | 2.83E-01 | 2.20  | 0.32 | 605.6    | 14/18         |
| 27 | psu PFI0165c                                                                                                             | organism=Plasmodium_falciparum_3D7   product=DEAD/DEAH box helicase, putative   location=MAL9:151 |            |          |   | 2.64E-09 | 60.27 |      | 300733.3 | 6 (6 0 0 0 0) |
|    | 4551                                                                                                                     | R.LVDVYNFNITNLIK.S                                                                                | 1779.96399 | 0.00212  | 2 | 2.64E-09 | 5.44  | 0.50 | 2403.5   | 23/28         |
|    | 5150                                                                                                                     | K.ELEDMTINLINELMK.R                                                                               | 1805.90234 | 0.00030  | 2 | 2.12E-07 | 3.60  | 0.59 | 1269.9   | 20/28         |
|    | 1563                                                                                                                     | K.INDNNNNINCDNTK.N                                                                                | 1719.73511 | 0.00127  | 2 | 5.00E-06 | 3.16  | 0.42 | 623.3    | 17/28         |
|    | 4443                                                                                                                     | R.SPFLVSLFK.G                                                                                     | 1037.60303 | -0.00154 | 2 | 1.79E-04 | 2.91  | 0.49 | 942.3    | 14/16         |
|    | 4411                                                                                                                     | R.ENVDIFNSYMK.L                                                                                   | 1458.69336 | 0.00066  | 2 | 4.01E-03 | 2.46  | 0.55 | 1250.9   | 17/22         |
|    | 3285                                                                                                                     | K.LFQELYK.R                                                                                       | 940.51385  | -0.03602 | 2 | 4.06E-01 | 2.08  | 0.12 | 405.3    | 11/12         |
| 28 | gij 547754 sp P35908.1 K22E_HUMAN Keratin, type II cytoskeletal 2 epidermal (Cytokeratin-2e) (CK 2e) (K2e) (keratin-2)   |                                                                                                   |            |          |   | 5.90E-11 | 60.23 |      | 65825.4  | 6 (6 0 0 0 0) |
|    | 1389                                                                                                                     | R.GSSGGGYSSGSSSYGSGGR.Q                                                                           | 1740.70557 | 0.00407  | 2 | 5.90E-11 | 4.69  | 0.68 | 1991.3   | 27/38         |
|    | 1546                                                                                                                     | R.GSGGGGSGISGGGYGSGGGSGGR.Y                                                                       | 1741.74841 | -0.00386 | 2 | 1.26E-09 | 4.45  | 0.73 | 902.6    | 23/44         |
|    | 1944                                                                                                                     | R.SKEEAEALYHSK.Y                                                                                  | 1391.68018 | 0.00037  | 3 | 4.20E-05 | 3.32  | 0.42 | 1243.5   | 24/44         |
|    | 2517                                                                                                                     | R.GFSSGSAAVVGSGSR.R                                                                               | 1254.60730 | -0.00252 | 2 | 1.56E-05 | 3.09  | 0.52 | 2002.0   | 22/26         |
|    | 1551                                                                                                                     | R.YGSGGSKGSGISGGGYGSGGGK.H                                                                        | 1890.85767 | -0.00571 | 3 | 9.82E-03 | 2.94  | 0.54 | 399.0    | 22/88         |
|    | 3024                                                                                                                     | R.YLDGLTAER.T                                                                                     | 1037.52625 | 0.00078  | 2 | 1.85E-01 | 2.28  | 0.41 | 711.3    | 14/16         |
| 29 | psu PFE0060w                                                                                                             | organism=Plasmodium_falciparum_3D7   product=hypothetical protein   location=MAL5:64065-65489(+)  |            |          |   | 4.83E-10 | 54.25 |      | 48690.3  | 6 (5 0 0 1 0) |
|    | 1459                                                                                                                     | K.NHEESNANMNNHNSFNDK.S                                                                            | 2115.85327 | -0.00405 | 3 | 4.83E-10 | 5.09  | 0.64 | 1542.3   | 37/68         |
|    | 4371                                                                                                                     | R.TLILGSFPQAGEILR.E                                                                               | 1614.92139 | 0.00114  | 2 | 1.05E-03 | 4.63  | 0.50 | 1224.5   | 23/28         |
|    | 3753                                                                                                                     | K.FSYALDPNDYASIEDK.L                                                                              | 1847.83337 | 0.00139  | 2 | 9.86E-10 | 4.33  | 0.62 | 1180.9   | 22/30         |
|    | 2949                                                                                                                     | K.HLLQQINTYK.H                                                                                    | 1257.69495 | -0.00362 | 2 | 1.79E-05 | 3.69  | 0.53 | 957.9    | 16/18         |
|    | 1640                                                                                                                     | K.HEENHKPQMVQAPPEK.E                                                                              | 1955.93921 | -0.00608 | 4 | 1.53E-02 | 3.10  | 0.42 | 445.6    | 23/96         |
|    | 2415                                                                                                                     | K.NEQDTNNTHTPNHDEYSHNLPK.N                                                                        | 2605.12988 | -0.06292 | 5 | 1.20E-01 | 1.36  | 0.22 | 338.1    | 27/168        |
| 30 | gij 42716291 ref NP_976217.1  erythrocyte membrane protein band 4.1 (elliptocytosis 1, RH-linked) isoform 2 [Homo sapien |                                                                                                   |            |          |   | 2.57E-08 | 50.23 |      | 71911.1  | 5 (5 0 0 0 0) |
|    | 3060                                                                                                                     | K.KLSMYGVDLHK.A                                                                                   | 1290.68750 | -0.00052 | 3 | 6.24E-03 | 4.69  | 0.39 | 1637.9   | 27/40         |
|    | 3233                                                                                                                     | K.LSMYGVDLHK.A                                                                                    | 1162.59253 | 0.00224  | 2 | 5.45E-05 | 2.87  | 0.48 | 1210.3   | 16/18         |
|    | 4017                                                                                                                     | R.SMTPAQADLEFLENAK.K                                                                              | 1764.84729 | -0.00032 | 2 | 2.57E-08 | 2.30  | 0.50 | 423.1    | 16/30         |
|    | 2439                                                                                                                     | R.LTSTDITPK.S                                                                                     | 975.53571  | -0.01119 | 2 | 9.73E-02 | 2.27  | 0.26 | 439.7    | 12/16         |
|    | 2892                                                                                                                     | K.TWLDSAK.E                                                                                       | 820.41992  | 0.00042  | 2 | 1.72E-01 | 2.11  | 0.25 | 270.0    | 9/12          |
| 31 | psu PF14_0186                                                                                                            | organism=Plasmodium_falciparum_3D7   product=hypothetical protein   location=MAL14:797708-799465( |            |          |   | 9.40E-05 | 50.21 |      | 69935.1  | 5 (5 0 0 0 0) |
|    | 2611                                                                                                                     | K.IINDNSNLSAPEK.V                                                                                 | 1414.71729 | 0.00175  | 2 | 1.15E-02 | 4.17  | 0.45 | 1366.2   | 19/24         |
|    | 2373                                                                                                                     | K.NENMLDTTNQK.D                                                                                   | 1421.63257 | -0.00191 | 2 | 2.30E-03 | 3.73  | 0.47 | 830.5    | 17/22         |
|    | 4056                                                                                                                     | K.INFYFLPNQEK.K                                                                                   | 1412.72083 | 0.00187  | 2 | 6.82E-03 | 3.18  | 0.46 | 692.3    | 13/20         |
|    | 4781                                                                                                                     | K.YNIMNIPTMVLDR.N                                                                                 | 1692.88110 | -0.00239 | 2 | 9.40E-05 | 2.77  | 0.50 | 662.6    | 16/26         |
|    | 2829                                                                                                                     | K.HINNFTYIK.H                                                                                     | 1149.60510 | -0.00398 | 2 | 4.83E-02 | 2.41  | 0.26 | 520.8    | 12/16         |
| 32 | psu PF08_0054                                                                                                            | organism=Plasmodium_falciparum_3D7   product=heat shock 70 kDa protein   location=MAL8:861481-86  |            |          |   | 5.65E-07 | 50.20 |      | 73868.6  | 5 (5 0 0 0 0) |
|    | 2832                                                                                                                     | R.NENVDIANDQGNR.T                                                                                 | 1571.74084 | -0.00178 | 2 | 5.65E-07 | 4.10  | 0.51 | 1435.5   | 21/26         |
|    | 3173                                                                                                                     | K.SGVDEKPMIEVTYQGEK.K                                                                             | 1909.92114 | -0.00112 | 3 | 1.08E-04 | 3.62  | 0.42 | 533.2    | 24/64         |
|    | 2620                                                                                                                     | K.FTESSVQSDMK.H                                                                                   | 1258.56201 | -0.00007 | 2 | 2.74E-06 | 3.50  | 0.47 | 1545.4   | 18/20         |



|    |                                                                                                                       |                                 |            |          |   |          |       |      |          |               |
|----|-----------------------------------------------------------------------------------------------------------------------|---------------------------------|------------|----------|---|----------|-------|------|----------|---------------|
|    | 4864                                                                                                                  | K.TITILEWLEK.N                  | 1346.75659 | -0.00019 | 2 | 6.22E-05 | 2.78  | 0.43 | 809.8    | 14/20         |
|    | 2027                                                                                                                  | R.LSQDEIDR.M                    | 975.47418  | -0.00135 | 2 | 2.67E-03 | 2.57  | 0.20 | 992.8    | 13/14         |
| 33 | psu PF10_0130   organism=Plasmodium_falciparum_3D7   product=hypothetical protein   location=MAL10:515720-517606(     |                                 |            |          |   | 2.60E-07 | 50.18 |      | 75420.2  | 5 (5 0 0 0 0) |
|    | 4471                                                                                                                  | K.TLGIDSFLDIEDDTK.I             | 1681.81665 | -0.00044 | 2 | 2.60E-07 | 3.57  | 0.55 | 1441.3   | 21/28         |
|    | 4535 - 4537                                                                                                           | K.NNLINLLYIYK.D                 | 1380.78857 | 0.00005  | 2 | 3.79E-04 | 3.45  | 0.40 | 1112.0   | 16/20         |
|    | 3803                                                                                                                  | K.FAYFDLTR.N                    | 1032.51489 | -0.00117 | 2 | 1.38E-03 | 2.56  | 0.40 | 633.4    | 13/14         |
|    | 3489                                                                                                                  | K.LQQSIYFIK.N                   | 1139.64587 | -0.00141 | 2 | 2.28E-02 | 2.08  | 0.32 | 425.1    | 12/16         |
|    | 3160                                                                                                                  | K.QQDNQTFLLTK.Q                 | 1335.69031 | -0.00118 | 2 | 1.02E-03 | 2.01  | 0.54 | 131.5    | 10/20         |
| 34 | gij 57864582 ref NP_001009931.1  hornerin [Homo sapiens]                                                              |                                 |            |          |   | 5.55E-08 | 40.34 |      | 282225.7 | 4 (4 0 0 0 0) |
|    | 1398                                                                                                                  | R.SSSRGPYESGSGHSSGLGHQESR.S     | 2346.04541 | 0.00185  | 4 | 5.55E-08 | 6.75  | 0.63 | 4415.4   | 55/132        |
|    | 1359                                                                                                                  | R.HGSGSGHSSSYGQHSGSGWSSSSGR.H   | 2477.02100 | 0.00478  | 4 | 1.65E-07 | 3.89  | 0.59 | 905.6    | 40/150        |
|    | 1440                                                                                                                  | R.GPYESGSGHSSGLGHQESR.S         | 1928.84814 | -0.00106 | 3 | 7.17E-03 | 2.81  | 0.45 | 592.3    | 25/72         |
|    | 1310                                                                                                                  | R.SEQHGSSSGLSSYGQHSGSHQSSGHGR.Q | 2869.22290 | -0.00005 | 5 | 2.09E-01 | 2.52  | 0.24 | 765.8    | 44/224        |
| 35 | psu PFD0090c   organism=Plasmodium_falciparum_3D7   product=hypothetical protein, conserved in P.falciparum   locatio |                                 |            |          |   | 6.66E-08 | 40.31 |      | 49712.6  | 4 (4 0 0 0 0) |
|    | 3612                                                                                                                  | R.FGSYEQVLISQPHEFNER.L          | 2180.04077 | 0.00321  | 3 | 6.66E-08 | 6.21  | 0.57 | 2338.4   | 33/68         |
|    | 1451                                                                                                                  | K.KLSQDYNDVNKK.F                | 1451.74890 | -0.00308 | 3 | 9.41E-04 | 3.73  | 0.37 | 993.2    | 24/44         |
|    | 1653                                                                                                                  | K.KLSQDYNDVNK.K                 | 1323.65393 | -0.00349 | 2 | 2.44E-05 | 3.32  | 0.48 | 1437.4   | 16/20         |
|    | 1498                                                                                                                  | K.LSQDYNDVNKK.F                 | 1323.65393 | -0.00459 | 2 | 5.11E-04 | 2.69  | 0.28 | 814.4    | 14/20         |
| 36 | psu PF14_0593   organism=Plasmodium_falciparum_3D7   product=hypothetical protein   location=MAL14:2524856-252892     |                                 |            |          |   | 1.76E-08 | 40.27 |      | 161116.5 | 4 (4 0 0 0 0) |
|    | 1688                                                                                                                  | K.KNDTNNQTNDLNSNKDETSQSQTNR.F   | 2894.31079 | -0.00474 | 4 | 1.62E-04 | 5.38  | 0.44 | 1524.7   | 44/150        |
|    | 4466                                                                                                                  | K.ILDTLNNLENNLILESIASK.N        | 2428.29297 | 0.00192  | 3 | 1.76E-08 | 4.96  | 0.63 | 2271.8   | 36/84         |
|    | 4697                                                                                                                  | K.SYEYEKDEYNEEIIDLLNLYK.T       | 2683.26611 | 0.00022  | 3 | 4.10E-04 | 3.42  | 0.28 | 463.0    | 20/80         |
|    | 3848                                                                                                                  | K.LPPLLNEIK.K                   | 1036.64014 | -0.00020 | 2 | 2.58E-03 | 2.15  | 0.27 | 361.2    | 13/16         |
| 37 | gij 4504301 ref NP_003529.1  histone cluster 1, H4a [Homo sapiens]                                                    |                                 |            |          |   | 7.38E-05 | 40.21 |      | 11360.4  | 4 (4 0 0 0 0) |
|    | 2868                                                                                                                  | R.DNIQGITKPAIR.R                | 1325.75354 | -0.00276 | 2 | 1.72E-04 | 3.85  | 0.20 | 928.1    | 17/22         |
|    | 3143                                                                                                                  | R.ISGLIYEETR.G                  | 1180.62085 | -0.00410 | 2 | 1.21E-04 | 3.52  | 0.50 | 1067.1   | 16/18         |
|    | 3664                                                                                                                  | K.VFLENVIR.D                    | 989.57782  | -0.00215 | 2 | 7.93E-03 | 3.22  | 0.34 | 479.7    | 12/14         |
|    | 1666 - 1668                                                                                                           | R.DAVTYTEHAK.R                  | 1134.54260 | -0.00483 | 2 | 7.38E-05 | 2.08  | 0.43 | 494.3    | 13/18         |
| 38 | psu PFI0605c   organism=Plasmodium_falciparum_3D7   product=hypothetical protein, conserved   location=MAL9:551417-   |                                 |            |          |   | 1.29E-06 | 40.21 |      | 52671.4  | 4 (4 0 0 0 0) |
|    | 3303                                                                                                                  | K.VNNLLNSIEK.R                  | 1257.67969 | -0.00227 | 2 | 1.92E-03 | 4.14  | 0.29 | 1410.1   | 18/20         |
|    | 2749                                                                                                                  | K.IDGIYDDHDYNK.N                | 1467.63867 | 0.00005  | 2 | 1.29E-06 | 3.25  | 0.49 | 1208.1   | 18/22         |
|    | 4151 - 4153                                                                                                           | K.TSVNDSGDGVEILVANQVFNNK.N      | 2263.12012 | 0.00403  | 3 | 8.19E-06 | 2.91  | 0.54 | 566.9    | 23/80         |
|    | 2764                                                                                                                  | K.LYIDPDNEK.N                   | 1106.53638 | -0.00215 | 2 | 1.07E-03 | 2.01  | 0.14 | 1040.7   | 14/16         |
| 39 | gij 4503595 ref NP_000493.1  eosinophil peroxidase [Homo sapiens]                                                     |                                 |            |          |   | 5.76E-06 | 40.20 |      | 80989.3  | 4 (4 0 0 0 0) |
|    | 2767                                                                                                                  | R.RPLLGASNQALAR.W               | 1366.79138 | -0.00082 | 3 | 1.24E-04 | 4.00  | 0.43 | 1779.5   | 27/48         |
|    | 3699                                                                                                                  | R.IVYEGGIDPILR.G                | 1344.75220 | -0.00020 | 2 | 5.76E-06 | 3.87  | 0.57 | 1859.8   | 19/22         |
|    | 4174 - 4176                                                                                                           | R.ASAPNSHVPLSSAFFASWR.I         | 2032.00354 | -0.00070 | 3 | 2.84E-03 | 3.63  | 0.52 | 663.5    | 25/72         |
|    | 4100                                                                                                                  | R.TNYLGLLAINQR.F                | 1375.76917 | -0.00095 | 3 | 1.90E-01 | 3.46  | 0.18 | 959.5    | 21/44         |
| 40 | psu PF14_0036   organism=Plasmodium_falciparum_3D7   product=acid phosphatase, putative   location=MAL14:141410-1     |                                 |            |          |   | 3.58E-04 | 40.18 |      | 35800.9  | 4 (4 0 0 0 0) |
|    | 4069                                                                                                                  | K.FPLDPIQTNQITDLK.N             | 1742.93237 | 0.00103  | 2 | 3.58E-04 | 3.61  | 0.42 | 1668.6   | 24/28         |
|    | 4302                                                                                                                  | K.LKPPFVVALGDLTNK.F             | 1611.94690 | -0.00100 | 3 | 3.78E-02 | 2.56  | 0.25 | 700.4    | 25/56         |
|    | 3232                                                                                                                  | K.QITISAVGMQAK.D                | 1246.68237 | -0.00300 | 2 | 7.78E-04 | 2.54  | 0.47 | 383.3    | 12/22         |

|    |                         |                                                                                                       |            |          |   |          |       |      |          |               |
|----|-------------------------|-------------------------------------------------------------------------------------------------------|------------|----------|---|----------|-------|------|----------|---------------|
|    | 3857                    | K.SGIFIVQVTEDK.V                                                                                      | 1335.71545 | -0.00105 | 2 | 1.34E-03 | 2.32  | 0.51 | 746.0    | 14/22         |
| 41 | psu PFA0195w            | organism=Plasmodium_falciparum_3D7   product=hypothetical protein, conserved   location=MAL1:173099   |            |          |   | 3.14E-07 | 40.16 |      | 67759.6  | 4 (4 0 0 0 0) |
|    | 4247                    | K.NTINQTDIVLNSITK.L                                                                                   | 1673.90686 | 0.00054  | 2 | 3.14E-07 | 3.15  | 0.64 | 692.2    | 16/28         |
|    | 1901                    | K.INYDQNYNK.D                                                                                         | 1171.53784 | -0.00081 | 2 | 3.90E-04 | 2.75  | 0.36 | 720.8    | 13/16         |
|    | 1917                    | K.FMNHQINSEK.K                                                                                        | 1247.58374 | -0.00447 | 2 | 3.76E-03 | 2.21  | 0.43 | 520.3    | 14/18         |
|    | 1580                    | K.NLTNQTEEPK.N                                                                                        | 1173.57458 | -0.00373 | 2 | 2.78E-02 | 2.14  | 0.27 | 509.7    | 12/18         |
| 42 | psu MAL7P1.5            | organism=Plasmodium_falciparum_3D7   product=Plasmodium falciparum Maurer's Cleft 2 transmembrane     |            |          |   | 8.05E-11 | 30.33 |      | 27539.4  | 3 (3 0 0 0 0) |
|    | 4573                    | K.KKNPDDQISDLVSLVDNMNITQEK.K                                                                          | 2744.37720 | 0.00186  | 3 | 8.05E-11 | 6.59  | 0.30 | 2372.3   | 37/92         |
|    | 4693                    | K.KNPDDQISDLVSLVDNMNITQEK.K                                                                           | 2616.28223 | 0.00247  | 3 | 3.95E-04 | 4.52  | 0.10 | 786.7    | 26/88         |
|    | 4799                    | K.NPDDQISDLVSLVDNMNITQEK.K                                                                            | 2488.18726 | 0.00180  | 3 | 1.88E-05 | 4.29  | 0.43 | 1177.8   | 32/84         |
| 43 | psu PFB0100c            | organism=Plasmodium_falciparum_3D7   product=knob associated histidine-rich protein   location=MAL2:1 |            |          |   | 2.23E-11 | 30.29 |      | 71259.4  | 3 (3 0 0 0 0) |
|    | 1722 - 1724             | K.GASTTAGSTTGATTGANAVQSK.D                                                                            | 1938.93628 | 0.00585  | 2 | 3.17E-08 | 5.75  | 0.66 | 1217.3   | 22/42         |
|    | 3681                    | R.FPLGMNDEDEEGKEALAIK.D                                                                               | 2106.00586 | 0.00034  | 3 | 2.23E-11 | 5.01  | 0.52 | 1511.4   | 36/72         |
|    | 1584                    | K.NAANNGEQVMSR.G                                                                                      | 1290.58557 | -0.00557 | 2 | 8.40E-06 | 3.05  | 0.56 | 1109.7   | 16/22         |
| 44 | psu PF10_0104           | organism=Plasmodium_falciparum_3D7   product=hypothetical protein   location=MAL10:422960-424364(     |            |          |   | 2.58E-08 | 30.28 |      | 25661.7  | 3 (3 0 0 0 0) |
|    | 3393 - 3395             | K.WGTGSGNQLVTAVTTNK.N                                                                                 | 1733.88171 | -0.00099 | 2 | 2.58E-08 | 5.69  | 0.61 | 1206.4   | 20/32         |
|    | 3956                    | K.NTSYWEIGENVYLK.N                                                                                    | 1715.82751 | 0.00152  | 2 | 1.28E-07 | 3.02  | 0.60 | 732.1    | 18/26         |
|    | 2579                    | K.NINQNGYLSTSK.S                                                                                      | 1338.66479 | -0.00080 | 2 | 1.47E-03 | 2.95  | 0.41 | 832.6    | 16/22         |
| 45 | gij 1360744 pir  B35049 | ankyrin 1, erythrocyte splice form 3 - human [MASS=203445                                             |            |          |   | 1.97E-09 | 30.28 |      | 203319.9 | 3 (3 0 0 0 0) |
|    | 3532                    | R.TAAVLLQNDPNPDVLSK.T                                                                                 | 1794.95959 | 0.00347  | 2 | 6.70E-05 | 5.66  | 0.50 | 1536.8   | 21/32         |
|    | 3436                    | R.ISEILLDHGAPIQAK.T                                                                                   | 1604.90063 | -0.00019 | 2 | 1.97E-09 | 4.13  | 0.54 | 1965.8   | 23/28         |
|    | 5436                    | R.MSFPETVDEILDVSEDEGEELISFK.A                                                                         | 2858.31763 | 0.00833  | 3 | 8.86E-08 | 3.23  | 0.50 | 404.2    | 24/96         |
| 46 | psu PFB0840w            | organism=Plasmodium_falciparum_3D7   product=replication factor C, subunit 2   location=MAL2:738859-  |            |          |   | 4.29E-11 | 30.26 |      | 37898.7  | 3 (3 0 0 0 0) |
|    | 5106                    | K.TVQDIIEDGFDVAYIFK.S                                                                                 | 1972.99023 | -0.00398 | 2 | 4.29E-11 | 5.21  | 0.67 | 3214.3   | 26/32         |
|    | 4522                    | K.TSAINALAHLEFGK.E                                                                                    | 1471.79041 | 0.00151  | 2 | 6.25E-05 | 3.64  | 0.55 | 1104.7   | 17/26         |
|    | 2692                    | K.IIETTEGDLR.R                                                                                        | 1146.60010 | -0.00337 | 2 | 6.21E-02 | 3.27  | 0.46 | 622.0    | 13/18         |
| 47 | psu PFC0110w            | organism=Plasmodium_falciparum_3D7   product=Cytoadherence linked asexual protein 3.1   location=MA   |            |          |   | 2.14E-07 | 30.26 |      | 167381.1 | 3 (3 0 0 0 0) |
|    | 2425                    | K.NENANVNTPENLNK.L                                                                                    | 1570.74561 | -0.00020 | 2 | 2.65E-05 | 5.24  | 0.47 | 1605.7   | 21/26         |
|    | 3480                    | K.LLNEYDNIEQLK.S                                                                                      | 1491.76892 | 0.00090  | 2 | 4.63E-05 | 3.37  | 0.50 | 1412.1   | 17/22         |
|    | 4362                    | K.NITDADDETYIIPVQSSFHDIVK.Y                                                                           | 2721.32544 | 0.00321  | 3 | 2.14E-07 | 3.31  | 0.44 | 444.4    | 27/92         |
| 48 | psu PF13_0143           | organism=Plasmodium_falciparum_3D7   product=phosphoribosylpyrophosphate synthetase   location=M      |            |          |   | 1.01E-10 | 30.25 |      | 49351.6  | 3 (3 0 0 0 0) |
|    | 4671                    | R.VPVDNLEAQLIGLDYFTK.K                                                                                | 2035.07458 | 0.00310  | 2 | 1.01E-10 | 5.04  | 0.68 | 1854.5   | 25/34         |
|    | 2765                    | R.VPISAADVAR.M                                                                                        | 998.56293  | -0.00234 | 2 | 1.99E-04 | 2.32  | 0.36 | 875.1    | 17/18         |
|    | 4210                    | K.ESLNDLFNIK.S                                                                                        | 1192.62085 | -0.00032 | 2 | 2.50E-03 | 2.30  | 0.26 | 628.3    | 13/18         |
| 49 | psu PF14_0538           | organism=Plasmodium_falciparum_3D7   product=hypothetical protein   location=MAL14:2314316-232149     |            |          |   | 4.79E-10 | 30.25 |      | 283024.1 | 3 (3 0 0 0 0) |
|    | 3131                    | K.HNYFDVEHNDTNSIVK.Y                                                                                  | 2060.93091 | -0.00107 | 3 | 1.35E-05 | 4.96  | 0.53 | 2500.6   | 33/64         |
|    | 3199                    | K.NNSNNSTLDIINDDR.S                                                                                   | 1704.77832 | -0.00117 | 2 | 2.40E-08 | 4.42  | 0.54 | 1783.2   | 21/28         |
|    | 4608                    | R.NLIISQLIDNINEDR.K                                                                                   | 1769.93921 | 0.00456  | 2 | 4.79E-10 | 4.03  | 0.59 | 1966.7   | 23/28         |
| 50 | psu MAL8P1.98           | organism=Plasmodium_falciparum_3D7   product=serine protease, putative   location=MAL8:616354-6188    |            |          |   | 8.43E-07 | 30.24 |      | 42818.5  | 3 (3 0 0 0 0) |
|    | 4590                    | K.VDDLIFLGSQFIYNK.N                                                                                   | 1700.88940 | -0.00019 | 2 | 5.33E-06 | 4.47  | 0.57 | 2015.3   | 22/28         |
|    | 3189                    | K.QGEVVIAYGQIQK.F                                                                                     | 1432.77942 | 0.00017  | 2 | 8.43E-07 | 4.08  | 0.48 | 1939.6   | 20/24         |
|    | 3983                    | K.IDNYGLALPSNVLK.N                                                                                    | 1516.83691 | 0.00249  | 2 | 1.04E-03 | 3.13  | 0.56 | 663.5    | 16/26         |

|    |                                                                                                                      |                              |            |          |   |          |         |               |        |        |
|----|----------------------------------------------------------------------------------------------------------------------|------------------------------|------------|----------|---|----------|---------|---------------|--------|--------|
| 51 | psu PF14_0445   organism=Plasmodium_falciparum_3D7   product=hypothetical protein   location=MAL14:1920913-192158    |                              | 9.66E-06   | 30.23    |   |          | 20330.7 | 3 (3 0 0 0 0) |        |        |
|    | 4775 - 4777                                                                                                          | K.FNDIFLFIEDTTK.N            | 1602.80505 | 0.00200  | 2 | 9.66E-06 | 4.57    | 0.57          | 1523.1 | 19/24  |
|    | 2235                                                                                                                 | K.NLNPNYNNNDEEK.Q            | 1463.63977 | -0.00349 | 2 | 6.06E-05 | 3.51    | 0.40          | 590.2  | 17/22  |
|    | 2015                                                                                                                 | K.QNSDVLNQR.N                | 1202.57605 | -0.00069 | 2 | 1.00E-03 | 2.45    | 0.41          | 430.1  | 11/18  |
| 52 | psu PFE0810c   organism=Plasmodium_falciparum_3D7   product=40S ribosomal subunit protein S14, putative   location=M |                              | 1.63E-07   | 30.22    |   |          | 16066.7 | 3 (3 0 0 0 0) |        |        |
|    | 2867                                                                                                                 | K.TPQPETAIVSGPQPK.E          | 1549.82202 | 0.00017  | 2 | 1.86E-06 | 4.40    | 0.60          | 1004.1 | 21/28  |
|    | 3031                                                                                                                 | R.IEDVTPIPTDSTR.K            | 1443.73254 | -0.00031 | 2 | 1.63E-07 | 4.15    | 0.51          | 1052.2 | 20/24  |
|    | 1736                                                                                                                 | K.SKTPGPGAQSALR.A            | 1269.69092 | -0.00448 | 3 | 4.10E-02 | 2.63    | 0.40          | 547.2  | 20/48  |
| 53 | psu PFL1005c   organism=Plasmodium_falciparum_3D7   product=chromodomain protein   location=MAL12:831245-832044      |                              | 7.91E-09   | 30.22    |   |          | 30999.3 | 3 (3 0 0 0 0) |        |        |
|    | 4131                                                                                                                 | K.NLHNVDGDELYSVIHNNK.E       | 2306.18872 | 0.00248  | 3 | 7.91E-09 | 4.35    | 0.52          | 925.3  | 33/76  |
|    | 3183                                                                                                                 | K.NESPQWVEETNIR.R            | 1601.75537 | 0.00176  | 2 | 5.31E-06 | 4.35    | 0.57          | 1645.7 | 20/24  |
|    | 3652                                                                                                                 | K.HENHVNDGNLLNVEDVYSVR.I     | 2323.10620 | -0.00352 | 4 | 5.52E-03 | 2.97    | 0.35          | 876.6  | 33/114 |
| 54 | psu PF14_0301   organism=Plasmodium_falciparum_3D7   product=hypothetical protein   location=MAL14:1260850-126276    |                              | 3.34E-06   | 30.21    |   |          | 33245.8 | 3 (3 0 0 0 0) |        |        |
|    | 4081                                                                                                                 | K.FDNSGISLLDIK.Y             | 1321.69983 | -0.00056 | 2 | 6.30E-04 | 4.19    | 0.42          | 1898.6 | 20/22  |
|    | 4474                                                                                                                 | K.SINDNAISVEVIQNIMEK.K       | 2017.02698 | 0.00359  | 2 | 3.34E-06 | 3.79    | 0.61          | 811.5  | 19/34  |
|    | 3617                                                                                                                 | K.LLNKPSLDLLK.N              | 1253.78271 | 0.00074  | 3 | 1.73E-03 | 2.50    | 0.16          | 362.5  | 21/40  |
| 55 | psu PFC1080c   organism=Plasmodium_falciparum_3D7   product=Plasmodium falciparum Maurer's Cleft 2 transmembrane     |                              | 3.44E-05   | 30.19    |   |          | 26987.2 | 3 (3 0 0 0 0) |        |        |
|    | 4650                                                                                                                 | K.KNPDDQISSLVSLVDNMNITQEK.K  | 2588.28711 | 0.00461  | 3 | 2.10E-03 | 3.88    | 0.21          | 802.1  | 28/88  |
|    | 4514                                                                                                                 | K.KKNPDDQISSLVSLVDNMNITQEK.K | 2716.38208 | 0.00039  | 4 | 4.53E-05 | 3.51    | 0.39          | 1026.7 | 33/138 |
|    | 3764                                                                                                                 | K.EYMDSYLMHLR.M              | 1457.65515 | 0.00200  | 2 | 3.44E-05 | 2.64    | 0.35          | 623.8  | 16/20  |
| 56 | psu PF13_0032   organism=Plasmodium_falciparum_3D7   product=hydrolase, putative   location=MAL13:289766-291202(-    |                              | 6.44E-08   | 30.19    |   |          | 56775.0 | 3 (3 0 0 0 0) |        |        |
|    | 3932                                                                                                                 | R.YIQEALYDPNIQIMK.N          | 1838.93567 | 0.00017  | 2 | 6.44E-08 | 3.07    | 0.47          | 1133.7 | 18/28  |
|    | 3161                                                                                                                 | K.NTENIYIDK.Y                | 1222.63135 | -0.00203 | 2 | 2.99E-05 | 2.96    | 0.49          | 919.3  | 16/18  |
|    | 3517                                                                                                                 | K.YEEIGIPISNSTVK.G           | 1549.81079 | 0.00090  | 2 | 6.10E-03 | 2.41    | 0.48          | 285.8  | 13/26  |
| 57 | psu PF10_0323   organism=Plasmodium_falciparum_3D7   product=early transcribed membrane protein 10.2, etramp 10.2    |                              | 2.14E-06   | 30.19    |   |          | 38902.0 | 3 (3 0 0 0 0) |        |        |
|    | 2323                                                                                                                 | K.AIEQDLQQK.K                | 1072.56335 | 0.00066  | 2 | 1.93E-02 | 3.29    | 0.32          | 940.7  | 13/16  |
|    | 4287                                                                                                                 | K.FNDNDLLLAESLK.E            | 1562.80603 | 0.00090  | 2 | 2.14E-06 | 3.29    | 0.55          | 1702.4 | 20/26  |
|    | 2524                                                                                                                 | K.LDDEKKEDLLK.F              | 1345.72095 | 0.00040  | 3 | 9.14E-05 | 3.15    | 0.19          | 1569.2 | 28/40  |
| 58 | psu PF10_0366   organism=Plasmodium_falciparum_3D7   product=ADP/ATP transporter on adenylate translocase   locati   |                              | 1.31E-04   | 30.19    |   |          | 33704.7 | 3 (3 0 0 0 0) |        |        |
|    | 3624                                                                                                                 | K.MLIQTQDSIPEIK.S            | 1515.80872 | 0.00017  | 2 | 1.31E-04 | 3.71    | 0.39          | 1298.6 | 20/24  |
|    | 1841                                                                                                                 | R.YDQNTDFSK.F                | 1117.47961 | -0.00031 | 2 | 1.52E-02 | 2.64    | 0.43          | 737.4  | 14/16  |
|    | 3912                                                                                                                 | K.EQGVLSLWR.G                | 1087.58948 | -0.00118 | 2 | 6.42E-03 | 2.38    | 0.26          | 509.9  | 12/16  |
| 59 | psu PF08_0076   organism=Plasmodium_falciparum_3D7   product=40S ribosomal protein S16, putative   location=MAL8:6   |                              | 6.61E-06   | 30.17    |   |          | 16275.1 | 3 (3 0 0 0 0) |        |        |
|    | 4262                                                                                                                 | K.VYEPLWLIGSGK.L             | 1361.74634 | 0.00066  | 2 | 6.61E-06 | 3.39    | 0.47          | 809.1  | 17/22  |
|    | 4155                                                                                                                 | K.NLDLVEPYILK.T              | 1316.74597 | 0.00151  | 2 | 7.54E-03 | 2.94    | 0.28          | 782.5  | 14/20  |
|    | 2779                                                                                                                 | K.GGGQTSQIYAIR.Q             | 1250.64880 | -0.00337 | 2 | 3.69E-02 | 2.75    | 0.26          | 1101.2 | 14/22  |
| 60 | psu PF07_0129   organism=Plasmodium_falciparum_3D7   product=acyl-coA synthetase, PfACS5   location=MAL7:142353      |                              | 4.32E-06   | 30.17    |   |          | 93224.9 | 3 (3 0 0 0 0) |        |        |
|    | 4107                                                                                                                 | K.SGSIFSGYFLEK.E             | 1334.66272 | 0.00029  | 2 | 2.18E-05 | 3.34    | 0.52          | 1085.0 | 18/22  |
|    | 2025                                                                                                                 | K.TGITEDNYNDR.L              | 1297.56555 | -0.00203 | 2 | 4.32E-06 | 2.77    | 0.55          | 901.5  | 16/20  |
|    | 3817                                                                                                                 | K.IWDTNNYLTPTLK.V            | 1578.81628 | 0.00200  | 2 | 2.91E-05 | 2.59    | 0.42          | 438.3  | 15/24  |
| 61 | psu PF10_0187   organism=Plasmodium_falciparum_3D7   product=ribosomal protein L30e, putative   location=MAL10:786   |                              | 2.08E-04   | 30.17    |   |          | 11767.1 | 3 (3 0 0 0 0) |        |        |
|    | 3321                                                                                                                 | K.LVIVSSNCPSIQR.S            | 1415.76746 | -0.00179 | 2 | 1.09E-02 | 3.31    | 0.48          | 1094.5 | 17/24  |

|    |               |                                                                                                        |            |          |   |          |       |      |          |               |
|----|---------------|--------------------------------------------------------------------------------------------------------|------------|----------|---|----------|-------|------|----------|---------------|
|    | 3840          | R.SVIEYYAMLSK.C                                                                                        | 1303.66028 | -0.00069 | 2 | 2.52E-02 | 2.88  | 0.48 | 1170.2   | 15/20         |
|    | 5486          | R.ISCLVITDVGDSIIK.T                                                                                    | 1690.89319 | 0.00505  | 2 | 2.08E-04 | 2.69  | 0.45 | 691.8    | 15/30         |
| 62 | psu PFL1925w  | organism=Plasmodium_falciparum_3D7   product=cell division protein FtsH, putative   location=MAL12:165 |            |          |   | 5.41E-04 | 30.16 |      | 100894.9 | 3 (3 0 0 0 0) |
|    | 4506          | K.ELDNLAFALLDK.E                                                                                       | 1361.73108 | 0.00005  | 2 | 5.41E-04 | 3.26  | 0.47 | 1089.7   | 17/22         |
|    | 5085          | R.FEEIAGIDESKLELLEVDFIK.N                                                                              | 2536.34326 | 0.00290  | 3 | 8.45E-03 | 2.83  | 0.49 | 788.6    | 27/84         |
|    | 3400          | R.YYENFFNR.R                                                                                           | 1152.51086 | -0.00092 | 2 | 1.31E-02 | 2.24  | 0.45 | 530.2    | 11/14         |
| 63 | psu PFD1015w  | organism=Plasmodium_falciparum_3D7   product=hypothetical protein, conserved   location=MAL4:10060     |            |          |   | 2.84E-05 | 30.16 |      | 44902.0  | 3 (3 0 0 0 0) |
|    | 3021 - 3023   | R.GDINMDQFNEK.K                                                                                        | 1310.56812 | -0.00038 | 2 | 3.18E-05 | 2.85  | 0.45 | 890.4    | 14/20         |
|    | 3712          | K.LTTVALGLGENPSLR.S                                                                                    | 1540.86938 | -0.00056 | 2 | 2.84E-05 | 2.68  | 0.51 | 641.1    | 16/28         |
|    | 3181          | K.DFTNYIQR.I                                                                                           | 1056.51086 | -0.00105 | 2 | 6.06E-03 | 2.67  | 0.32 | 366.4    | 11/14         |
| 64 | psu PFE0080c  | organism=Plasmodium_falciparum_3D7   product=rhoptry-associated protein 2, RAP2   location=MAL5:840    |            |          |   | 3.62E-07 | 30.15 |      | 46708.8  | 3 (3 0 0 0 0) |
|    | 4000          | K.SMLSTDDYQSFFK.N                                                                                      | 1568.69373 | 0.00163  | 2 | 3.62E-07 | 2.96  | 0.61 | 903.7    | 18/24         |
|    | 3300          | K.SNPYFIVGSR.V                                                                                         | 1139.58435 | -0.00203 | 2 | 5.89E-05 | 2.77  | 0.55 | 585.5    | 14/18         |
|    | 3887          | K.YTEISVLNYVR.D                                                                                        | 1356.71582 | -0.00203 | 2 | 1.11E-04 | 2.37  | 0.37 | 523.7    | 17/20         |
| 65 | psu PF14_0159 | organism=Plasmodium_falciparum_3D7   product=hypothetical protein, conserved   location=MAL14:6454     |            |          |   | 1.98E-05 | 30.15 |      | 110641.7 | 3 (3 0 0 0 0) |
|    | 4695          | R.DWFEEFAPIEVVR.N                                                                                      | 1636.80054 | 0.00200  | 2 | 1.98E-05 | 2.95  | 0.59 | 880.8    | 17/24         |
|    | 2179          | K.STINEDINNK.L                                                                                         | 1147.55896 | -0.00203 | 2 | 5.86E-03 | 2.24  | 0.35 | 694.8    | 13/18         |
|    | 2097          | R.DAQYIQETGSK.M                                                                                        | 1239.58521 | -0.00142 | 2 | 6.07E-04 | 2.01  | 0.39 | 535.6    | 12/20         |
| 66 | psu PFE0675c  | organism=Plasmodium_falciparum_3D7   product=deoxyribodipyrimidine photolyase (photoreactivating enz   |            |          |   | 1.64E-04 | 30.13 |      | 129116.7 | 3 (3 0 0 0 0) |
|    | 4087          | K.NNVLLLLLTR.D                                                                                         | 1055.65710 | -0.00129 | 2 | 2.05E-03 | 2.66  | 0.27 | 879.1    | 13/16         |
|    | 3993          | R.INDNWSLIYAYEK.A                                                                                      | 1628.79553 | 0.00310  | 2 | 1.64E-04 | 2.39  | 0.53 | 255.8    | 13/24         |
|    | 3847          | K.ELFSEEMIMK.K                                                                                         | 1256.59009 | 0.00151  | 2 | 4.66E-03 | 2.07  | 0.46 | 1033.3   | 14/18         |
| 67 | gij 155969697 | ref NP_775109.2  keratin 6C [Homo sapiens]                                                             |            |          |   | 1.58E-11 | 20.32 |      | 59988.4  | 2 (2 0 0 0 0) |
|    | 5143          | R.NLDLDSIIAEVKAQYEEIAQR.S                                                                              | 2418.25098 | -0.00125 | 3 | 1.58E-11 | 6.10  | 0.62 | 1341.6   | 40/80         |
|    | 2915          | R.SGFSSISVSR.S                                                                                         | 1026.52148 | -0.00373 | 2 | 1.72E-03 | 3.12  | 0.37 | 984.1    | 14/18         |
| 68 | psu PF14_0627 | organism=Plasmodium_falciparum_3D7   product=ribosomal protein S3, putative   location=MAL14:26840     |            |          |   | 1.32E-08 | 20.30 |      | 24652.4  | 2 (2 0 0 0 0) |
|    | 4813          | K.FINDGVFQAELNEFLAR.I                                                                                  | 1982.99707 | 0.00383  | 2 | 1.32E-08 | 5.38  | 0.63 | 1664.6   | 24/32         |
|    | 3124          | R.ILAEDGYSGVEVR.V                                                                                      | 1407.71143 | -0.00106 | 2 | 1.00E-07 | 3.76  | 0.64 | 1827.3   | 20/24         |
| 69 | psu PF11_0224 | organism=Plasmodium_falciparum_3D7   product=circumsporozoite-related antigen   location=MAL11:815     |            |          |   | 7.43E-08 | 20.29 |      | 17285.0  | 2 (2 0 0 0 0) |
|    | 4787 - 4789   | K.KSGGEPLIDVHDLISDMIK.K                                                                                | 2067.07910 | -0.00030 | 3 | 7.43E-08 | 5.86  | 0.52 | 1691.5   | 34/72         |
|    | 2321          | K.KEEELVEVNR.K                                                                                         | 1372.74304 | 0.00074  | 3 | 6.59E-04 | 3.63  | 0.18 | 1135.8   | 22/40         |
| 70 | psu PF13_0082 | organism=Plasmodium_falciparum_3D7   product=cop-coated vesicle membrane protein p24 precursor, p      |            |          |   | 4.43E-08 | 20.27 |      | 24426.7  | 2 (2 0 0 0 0) |
|    | 4984          | K.TSELFDQFLEVFEQER.M                                                                                   | 2131.98193 | 0.00225  | 2 | 4.43E-08 | 5.36  | 0.48 | 2300.0   | 24/32         |
|    | 3749          | K.NNMIVGSYEFMDR.K                                                                                      | 1575.69299 | 0.00164  | 2 | 7.69E-07 | 4.24  | 0.56 | 1709.6   | 21/24         |
| 71 | psu PFC0730w  | organism=Plasmodium_falciparum_3D7   product=conserved protein, putative   location=MAL3:671131-67     |            |          |   | 1.94E-06 | 20.26 |      | 26023.9  | 2 (2 0 0 0 0) |
|    | 3336          | K.ISQTATSHLTQITGNLTK.L                                                                                 | 2043.07166 | -0.00192 | 3 | 1.94E-06 | 5.30  | 0.46 | 940.6    | 30/72         |
|    | 3392          | R.VFNNIDYVK.K                                                                                          | 1226.60522 | -0.00178 | 2 | 3.83E-05 | 3.20  | 0.51 | 1114.4   | 16/18         |
| 72 | psu PFD1055w  | organism=Plasmodium_falciparum_3D7   product=ribosomal protein S19s, putative   location=MAL4:10310    |            |          |   | 3.13E-08 | 20.26 |      | 19709.6  | 2 (2 0 0 0 0) |
|    | 4388 - 4390   | R.SILQLENLGYVEQNP.K                                                                                    | 1973.03381 | 0.00231  | 2 | 1.33E-07 | 5.24  | 0.49 | 1527.4   | 21/32         |
|    | 4326          | K.LAPLNEDWYFIR.A                                                                                       | 1536.78455 | 0.00139  | 2 | 3.13E-08 | 3.54  | 0.63 | 302.8    | 17/22         |
| 73 | psu PFE1465w  | organism=Plasmodium_falciparum_3D7   product=hypothetical protein, conserved   location=MAL5:119915    |            |          |   | 1.06E-07 | 20.25 |      | 191498.5 | 2 (2 0 0 0 0) |
|    | 5179          | K.FDPSNMTILNLIEDIK.W                                                                                   | 1862.95679 | 0.00127  | 2 | 1.06E-07 | 4.99  | 0.59 | 1635.2   | 24/30         |

|    |                                                                                                                                      |                               |            |          |   |          |       |      |          |               |
|----|--------------------------------------------------------------------------------------------------------------------------------------|-------------------------------|------------|----------|---|----------|-------|------|----------|---------------|
|    | 1526                                                                                                                                 | K.VTDENDAIDTQNKNEHND.-        | 2071.87988 | -0.00692 | 3 | 2.47E-03 | 3.09  | 0.35 | 272.7    | 21/68         |
| 74 | gji7245526 pdb 1DEJ A Chain A, Crystal Structure Of A DictyosteliumTETRAHYMENA CHIMERA Actin (Mutant 646: Q228)                      |                               |            |          |   | 2.19E-07 | 20.24 |      | 41719.9  | 2 (2 0 0 0 0) |
|    | 3828                                                                                                                                 | K.SYELPDGQVITIGNER.F          | 1790.89197 | 0.00285  | 2 | 2.19E-07 | 4.71  | 0.45 | 1601.8   | 25/30         |
|    | 2704                                                                                                                                 | R.GYSFTTTAER.E                | 1132.52698 | -0.00264 | 2 | 8.35E-05 | 2.34  | 0.63 | 630.9    | 15/18         |
| 75 | psu PFC0250c   organism=Plasmodium_falciparum_3D7   product=AP endonuclease (DNA-(apurinic or apyrimidinic site) lyase)              |                               |            |          |   | 2.06E-08 | 20.23 |      | 72397.8  | 2 (2 0 0 0 0) |
|    | 4762                                                                                                                                 | K.SLADYEIMEQILNDDFK.D         | 2043.95801 | -0.00113 | 3 | 2.06E-08 | 4.63  | 0.58 | 1248.2   | 29/64         |
|    | 3475                                                                                                                                 | K.ILTAGNLVDSYR.Y              | 1321.71106 | -0.00093 | 2 | 3.54E-06 | 4.35  | 0.53 | 1303.6   | 19/22         |
| 76 | psu PF11_0065   organism=Plasmodium_falciparum_3D7   product=ribosomal protein S4, putative   location=MAL11:23559                   |                               |            |          |   | 1.02E-06 | 20.23 |      | 32333.7  | 2 (2 0 0 0 0) |
|    | 4169                                                                                                                                 | R.LSNVFIGDNTKPYISLPR.E        | 2133.17017 | -0.00064 | 3 | 1.02E-06 | 4.62  | 0.45 | 1404.2   | 34/72         |
|    | 2847                                                                                                                                 | R.VGVISSIDK.N                 | 917.53021  | -0.00172 | 2 | 3.26E-03 | 2.44  | 0.39 | 583.5    | 12/16         |
| 77 | psu MAL13P1.61   organism=Plasmodium_falciparum_3D7   product=hypothetical protein, conserved in P. falciparum   location=MAL13:131  |                               |            |          |   | 2.29E-06 | 20.23 |      | 28236.9  | 2 (2 0 0 0 0) |
|    | 2985 - 2987                                                                                                                          | K.VETEQSTPAKPEPTEFVNNDIHKQK.N | 2852.36963 | 0.00124  | 4 | 2.29E-06 | 4.52  | 0.45 | 688.0    | 43/144        |
|    | 2397                                                                                                                                 | K.VHNDLNALK.S                 | 1023.55817 | -0.00197 | 2 | 1.59E-04 | 2.11  | 0.39 | 369.4    | 11/16         |
| 78 | psu PF14_0579   organism=Plasmodium_falciparum_3D7   product=ribosomal protein L27, putative   location=MAL14:2475                   |                               |            |          |   | 7.44E-09 | 20.22 |      | 13785.9  | 2 (2 0 0 0 0) |
|    | 2516                                                                                                                                 | K.KAVIVNTYEGQTR.E             | 1478.79614 | -0.00032 | 2 | 7.44E-09 | 4.35  | 0.61 | 1860.1   | 21/24         |
|    | 3323                                                                                                                                 | K.VIIILNGR.R                  | 897.58801  | -0.00148 | 2 | 4.37E-03 | 2.46  | 0.37 | 540.2    | 11/14         |
| 79 | psu PFE0975c   organism=Plasmodium_falciparum_3D7   product=40S ribosomal subunit protein S24, putative   location=MAL10:301126-3059 |                               |            |          |   | 2.12E-05 | 20.22 |      | 15381.8  | 2 (2 0 0 0 0) |
|    | 4396                                                                                                                                 | K.LNNVNTIVLFGFK.T             | 1478.83655 | -0.00105 | 2 | 2.12E-05 | 4.37  | 0.59 | 1393.9   | 20/24         |
|    | 3736                                                                                                                                 | K.QFALEILHPNK.G               | 1309.72632 | -0.00158 | 3 | 2.69E-04 | 3.23  | 0.28 | 775.5    | 23/40         |
| 80 | psu PF10_0075   organism=Plasmodium_falciparum_3D7   product=asparagine-rich antigen   location=MAL10:301126-3059                    |                               |            |          |   | 6.60E-08 | 20.22 |      | 182550.7 | 2 (2 0 0 0 0) |
|    | 1609                                                                                                                                 | R.LEAEQAGATTENR.T             | 1490.70813 | -0.00227 | 2 | 6.60E-08 | 3.82  | 0.57 | 1713.9   | 22/26         |
|    | 2609                                                                                                                                 | R.MQNYAGAGISGQSVHQTNK.L       | 1990.93994 | 0.00297  | 3 | 4.30E-04 | 3.24  | 0.41 | 572.9    | 26/72         |
| 81 | psu PFA0065w   organism=Plasmodium_falciparum_3D7   product=Plasmodium falciparum Maurer's Cleft 2 transmembrane protein             |                               |            |          |   | 7.31E-10 | 20.22 |      | 27542.6  | 2 (2 0 0 0 0) |
|    | 4705                                                                                                                                 | K.KNPDAEISDLVNLVDNMNITQEK.K   | 2600.28711 | 0.00132  | 3 | 5.17E-05 | 3.79  | 0.49 | 592.0    | 24/88         |
|    | 4836                                                                                                                                 | K.NPDAEISDLVNLVDNMNITQEK.K    | 2472.19214 | 0.00577  | 3 | 7.31E-10 | 3.60  | 0.56 | 947.8    | 29/84         |
| 82 | gji157830361 pdb 1BKE A Chain A, Human Serum Albumin In A Complex With Myristic Acid And Tri- Iodobenzoic Acid                       |                               |            |          |   | 2.27E-07 | 20.21 |      | 65992.9  | 2 (2 0 0 0 0) |
|    | 3276                                                                                                                                 | K.KVPQVSTPTLVEVSR.N           | 1639.93774 | -0.00124 | 3 | 2.84E-03 | 4.28  | 0.45 | 1427.0   | 28/56         |
|    | 3437                                                                                                                                 | K.VPQVSTPTLVEVSR.N            | 1511.84277 | -0.00056 | 2 | 2.27E-07 | 2.87  | 0.66 | 1222.0   | 20/26         |
| 83 | psu PF14_0455   organism=Plasmodium_falciparum_3D7   product=multidrug resistance protein 2 (heavy metal transport factor)           |                               |            |          |   | 1.63E-06 | 20.20 |      | 118936.9 | 2 (2 0 0 0 0) |
|    | 1441                                                                                                                                 | K.IYDNNNNNNNNNINSK.I          | 1878.83252 | 0.00969  | 2 | 1.75E-06 | 3.94  | 0.48 | 725.7    | 20/30         |
|    | 5033                                                                                                                                 | K.SFTDISDLIDLR.D              | 1507.80029 | -0.00337 | 2 | 1.63E-06 | 3.47  | 0.50 | 1342.6   | 17/24         |
| 84 | psu PFI0935w   organism=Plasmodium_falciparum_3D7   product=DNAJ-like molecular chaperone protein, putative   location=MAL12:1778142 |                               |            |          |   | 2.43E-04 | 20.20 |      | 43232.6  | 2 (2 0 0 0 0) |
|    | 2805                                                                                                                                 | K.IYHPDKNPDESANSSFIK.L        | 2061.98755 | -0.00645 | 4 | 2.43E-04 | 3.90  | 0.44 | 1292.3   | 35/102        |
|    | 3247                                                                                                                                 | K.QAYDVLTDVDR.R               | 1294.62732 | -0.00178 | 2 | 7.04E-04 | 2.36  | 0.48 | 311.4    | 12/20         |
| 85 | psu PFE0050w   organism=Plasmodium_falciparum_3D7   product=hypothetical protein   location=MAL5:55841-56872(+)                      |                               |            |          |   | 1.62E-04 | 20.19 |      | 30696.0  | 2 (2 0 0 0 0) |
|    | 4148                                                                                                                                 | R.INNAFNLDILR.T               | 1302.71643 | 0.00078  | 2 | 1.62E-04 | 3.78  | 0.38 | 1364.9   | 18/20         |
|    | 3484                                                                                                                                 | K.DIYKPIQSYANNFSK.V           | 1787.89624 | -0.00283 | 3 | 1.42E-02 | 2.58  | 0.24 | 586.0    | 21/56         |
| 86 | psu PFL2005w   organism=Plasmodium_falciparum_3D7   product=replication factor c subunit 4   location=MAL12:1778142                  |                               |            |          |   | 3.11E-07 | 20.19 |      | 37613.7  | 2 (2 0 0 0 0) |
|    | 4620                                                                                                                                 | R.FNIGSEVIQIEFLK.I            | 1636.89453 | 0.00078  | 2 | 3.11E-07 | 3.78  | 0.45 | 3198.8   | 23/26         |
|    | 2781                                                                                                                                 | K.IIDALQSR.C                  | 915.52582  | -0.00148 | 2 | 3.47E-03 | 2.42  | 0.14 | 700.1    | 14/14         |
| 87 | psu PF14_0083   organism=Plasmodium_falciparum_3D7   product=ribosomal protein S8e, putative   location=MAL14:3233                   |                               |            |          |   | 8.65E-06 | 20.19 |      | 25035.4  | 2 (2 0 0 0 0) |
|    | 4320                                                                                                                                 | K.LDSGSFSWPTFGISK.N           | 1628.79553 | -0.00019 | 2 | 8.65E-06 | 3.08  | 0.59 | 599.0    | 16/28         |

|     |                                  |                                                                                                                              |            |          |   |          |       |      |          |               |
|-----|----------------------------------|------------------------------------------------------------------------------------------------------------------------------|------------|----------|---|----------|-------|------|----------|---------------|
|     | 4186                             | K.NIDPLLEQFK.Q                                                                                                               | 1329.74133 | -0.00044 | 2 | 1.06E-02 | 2.67  | 0.40 | 492.8    | 13/20         |
| 88  | psu PF14_0563                    | organism=Plasmodium_falciparum_3D7   product=DEAD-box RNA helicase, putative   location=MAL14:24                             |            |          |   | 1.30E-05 | 20.18 |      | 84261.7  | 2 (2 0 0 0 0) |
|     | 5032                             | K.IDNELIQLTYLK.F                                                                                                             | 1575.89929 | 0.00090  | 2 | 1.30E-05 | 3.36  | 0.49 | 1353.9   | 17/24         |
|     | 1840                             | R.IGDTLNNTSNQR.V                                                                                                             | 1332.65027 | -0.00142 | 2 | 5.89E-05 | 3.17  | 0.49 | 932.4    | 16/22         |
| 89  | psu MAL8P1.146                   | organism=Plasmodium_falciparum_3D7   product=filament assembling protein, putative   location=MAL8                           |            |          |   | 5.61E-04 | 20.18 |      | 86688.6  | 2 (2 0 0 0 0) |
|     | 4818                             | K.NENFQNFVLEEIATIK.N                                                                                                         | 1908.97021 | -0.00014 | 3 | 5.61E-04 | 3.53  | 0.47 | 927.9    | 25/60         |
|     | 2653                             | K.INNISSNIENEK.V                                                                                                             | 1374.68591 | -0.00080 | 2 | 1.98E-03 | 2.96  | 0.39 | 920.6    | 19/22         |
| 90  | psu PFE0850c                     | organism=Plasmodium_falciparum_3D7   product=60S ribosomal protein L12, putative   location=MAL5:714                         |            |          |   | 2.75E-04 | 20.18 |      | 18100.8  | 2 (2 0 0 0 0) |
|     | 3013                             | R.QVGGEVGASSVLSPK.L                                                                                                          | 1414.75366 | -0.00044 | 2 | 4.07E-03 | 3.51  | 0.54 | 1049.4   | 21/28         |
|     | 2952                             | K.LEQVYSIAR.V                                                                                                                | 1078.58911 | -0.00215 | 2 | 2.75E-04 | 2.73  | 0.34 | 1424.7   | 15/16         |
| 91  | psu PF11_0374                    | organism=Plasmodium_falciparum_3D7   product=hypothetical protein   location=MAL11:1422741-142619                            |            |          |   | 2.05E-05 | 20.17 |      | 128465.1 | 2 (2 0 0 0 0) |
|     | 1871                             | R.EVLVSTNNNNNNNNNSGK.N                                                                                                       | 2303.02417 | 0.00901  | 3 | 1.78E-02 | 3.03  | 0.51 | 693.0    | 27/80         |
|     | 3196                             | K.NNILNGDADFEK.N                                                                                                             | 1349.63318 | -0.00166 | 2 | 2.05E-05 | 2.72  | 0.34 | 677.6    | 16/22         |
| 92  | psu PFD0080c                     | organism=Plasmodium_falciparum_3D7   product=hypothetical protein, conserved in P.falciparum   location=MAL11:1422741-142619 |            |          |   | 2.00E-05 | 20.17 |      | 60233.5  | 2 (2 0 0 0 0) |
|     | 2316                             | R.TPEESEQAWK.Y                                                                                                               | 1204.54810 | 0.00627  | 2 | 2.00E-05 | 3.50  | 0.40 | 1426.3   | 16/18         |
|     | 3204                             | K.IVFQDLSK.K                                                                                                                 | 949.53534  | -0.00258 | 2 | 2.90E-03 | 2.05  | 0.19 | 269.1    | 11/14         |
| 93  | psu MAL13P1.63                   | organism=Plasmodium_falciparum_3D7   product=Plasmodium falciparum asparagine-rich protein   location=MAL13:163              |            |          |   | 3.49E-06 | 20.16 |      | 139030.0 | 2 (2 0 0 0 0) |
|     | 4527                             | K.FVIQDVFDLR.S                                                                                                               | 1251.67322 | -0.00069 | 2 | 3.05E-04 | 2.78  | 0.53 | 1109.6   | 15/18         |
|     | 4355                             | R.LNTDEIQTVVNQVIDK.A                                                                                                         | 1828.96509 | 0.00444  | 2 | 3.49E-06 | 2.76  | 0.47 | 680.0    | 16/30         |
| 94  | gj 3387905 gb AAC28635.1         | glucose transporter glycoprotein [Homo sapiens] [MASS=                                                                       |            |          |   | 1.97E-04 | 20.16 |      | 37855.1  | 2 (2 0 0 0 0) |
|     | 4521                             | K.VTILELFR.S                                                                                                                 | 990.59827  | -0.00154 | 2 | 1.79E-03 | 3.29  | 0.50 | 911.0    | 13/14         |
|     | 3889                             | K.TPEELFHPLGADSQV.-                                                                                                          | 1639.79626 | -0.00215 | 2 | 1.97E-04 | 2.78  | 0.52 | 348.4    | 13/28         |
| 95  | psu PF13_0014                    | organism=Plasmodium_falciparum_3D7   product=40S ribosomal protein S7 homologue, putative   location=MAL13:163               |            |          |   | 2.69E-06 | 20.16 |      | 22466.6  | 2 (2 0 0 0 0) |
|     | 5192                             | R.TLTSVYDSILEDIVSPSEIIGK.R                                                                                                   | 2379.25415 | 0.00322  | 2 | 2.69E-06 | 3.01  | 0.52 | 399.8    | 16/42         |
|     | 2660                             | R.KLINELEK.K                                                                                                                 | 986.58807  | -0.00282 | 2 | 1.92E-01 | 2.59  | 0.10 | 532.1    | 13/14         |
| 96  | psu PF13_0224                    | organism=Plasmodium_falciparum_3D7   product=60S ribosomal subunit protein L18, putative   location=MAL13:163                |            |          |   | 1.74E-05 | 20.16 |      | 21732.7  | 2 (2 0 0 0 0) |
|     | 3044                             | R.ISEISSSLVR.R                                                                                                               | 1090.61023 | -0.00215 | 2 | 1.74E-05 | 2.62  | 0.34 | 864.5    | 14/18         |
|     | 4047                             | K.EGAIQLYSEMAGR.H                                                                                                            | 1495.72095 | 0.00102  | 2 | 4.82E-05 | 2.55  | 0.59 | 481.8    | 14/26         |
| 97  | psu PF11_0433                    | organism=Plasmodium_falciparum_3D7   product=hypothetical protein   location=MAL11:1681865-169008                            |            |          |   | 1.14E-06 | 20.16 |      | 324624.2 | 2 (2 0 0 0 0) |
|     | 4679                             | R.VDLISGYILDIAGK.G                                                                                                           | 1476.83081 | 0.00029  | 2 | 1.14E-06 | 3.11  | 0.50 | 1107.8   | 19/26         |
|     | 1681                             | K.HMNNNNNNNNNSNVVYNT.R                                                                                                       | 2246.97046 | 0.00406  | 3 | 4.34E-05 | 2.99  | 0.53 | 801.4    | 24/72         |
| 98  | psu PFC1020c                     | organism=Plasmodium_falciparum_3D7   product=40S ribosomal protein S3A, putative   location=MAL3:96                          |            |          |   | 2.46E-05 | 20.14 |      | 30028.3  | 2 (2 0 0 0 0) |
|     | 2729                             | R.KGYTLIEGHTDVK.T                                                                                                            | 1460.77441 | -0.00019 | 2 | 2.46E-05 | 2.86  | 0.31 | 1221.0   | 19/24         |
|     | 4023                             | K.IYPLQNVLIR.K                                                                                                               | 1228.74121 | 0.00029  | 2 | 1.70E-03 | 2.13  | 0.20 | 310.7    | 14/18         |
| 99  | psu PFF1470c                     | organism=Plasmodium_falciparum_3D7   product=DNA polymerase epsilon, catalytic subunit a, putative   location=MAL3:96        |            |          |   | 3.62E-04 | 20.14 |      | 344387.9 | 2 (2 0 0 0 0) |
|     | 4609 - 4611                      | K.IPLYDFFLSR.Y                                                                                                               | 1270.68298 | -0.00032 | 2 | 7.77E-03 | 2.82  | 0.52 | 472.4    | 13/18         |
|     | 4939                             | R.ISNIPLFNLFNVQNK.N                                                                                                          | 1760.96936 | -0.00081 | 2 | 3.62E-04 | 2.52  | 0.45 | 673.8    | 18/28         |
| 100 | gj 1174412 sp P02549 SPTA1_HUMAN | Spectrin alpha chain, erythrocyte (Erythroid alpha-spectrin)                                                                 |            |          |   | 8.08E-06 | 20.14 |      | 279742.3 | 2 (2 0 0 0 0) |
|     | 4637                             | K.ITDLEHFAESLIADEHYAK.E                                                                                                      | 2202.07129 | -0.00279 | 4 | 8.08E-06 | 2.79  | 0.41 | 547.9    | 37/108        |
|     | 4946                             | R.ADMEAEAPTFQALEDFSAELIDSGHHSPEIEK.K                                                                                         | 3585.63257 | 0.01235  | 4 | 1.82E-04 | 2.34  | 0.38 | 224.0    | 32/192        |
| 101 | psu PF11_0071                    | organism=Plasmodium_falciparum_3D7   product=RuvB DNA helicase, putative   location=MAL11:255714                             |            |          |   | 2.06E-06 | 20.14 |      | 53372.5  | 2 (2 0 0 0 0) |
|     | 4844                             | R.AIESPLAPILIMATNR.G                                                                                                         | 1709.96179 | 0.00249  | 2 | 2.06E-06 | 2.52  | 0.46 | 542.7    | 17/30         |

|     |                                                                                                                  |                              |            |          |   |                                           |          |       |          |               |
|-----|------------------------------------------------------------------------------------------------------------------|------------------------------|------------|----------|---|-------------------------------------------|----------|-------|----------|---------------|
|     | 4729                                                                                                             | R.EASLFLVDLIK.Q              | 1247.72461 | -0.00081 | 2 | 3.63E-01                                  | 2.37     | 0.35  | 575.9    | 12/20         |
| 102 | psu PF07_0040   organism=Plasmodium_falciparum_3D7   product=lysophospholipase-like protein, putative            |                              |            |          |   | location=MAL                              | 7.46E-04 | 20.13 | 42330.6  | 2 (2 0 0 0 0) |
|     | 4426                                                                                                             | K.ELYTLDDMDHLLPMEPGNER.V     | 2388.08472 | 0.00095  | 3 | 7.46E-04                                  | 2.66     | 0.37  | 348.7    | 20/76         |
|     | 3868                                                                                                             | K.YFYIPLAK.F                 | 1014.56586 | -0.00057 | 2 | 2.79E-01                                  | 2.07     | 0.43  | 197.7    | 8/14          |
| 103 | gij 88180 pir  C28894 myeloperoxidase (EC 1.11.1.7), splice form H14 - human [MAS                                |                              |            |          |   | 7.40E-04                                  | 20.13    |       | 92378.3  | 2 (2 0 0 0 0) |
|     | 2864                                                                                                             | R.QNQIIVDEIR.E               | 1185.62219 | -0.00312 | 2 | 7.40E-04                                  | 2.60     | 0.36  | 620.2    | 16/18         |
|     | 3141                                                                                                             | R.DHGLPGYNAWR.R              | 1285.60730 | -0.00093 | 2 | 3.05E-02                                  | 2.43     | 0.42  | 344.5    | 13/20         |
| 104 | psu PF07_0042   organism=Plasmodium_falciparum_3D7   product=hypothetical protein, conserved                     |                              |            |          |   | location=MAL7:51848                       | 3.42E-04 | 20.13 | 350482.6 | 2 (2 0 0 0 0) |
|     | 2169                                                                                                             | K.NDQNGYINEEKNETK.T          | 1924.85193 | -0.00259 | 3 | 2.31E-01                                  | 2.53     | 0.31  | 442.3    | 19/60         |
|     | 1535                                                                                                             | K.NYPNTQNNNTYK.S             | 1585.68774 | -0.00007 | 2 | 3.42E-04                                  | 2.07     | 0.41  | 86.5     | 11/24         |
| 105 | psu PFB0915w   organism=Plasmodium_falciparum_3D7   product=liver stage antigen 3                                |                              |            |          |   | location=MAL2:796750-801584(+)            | 6.10E-04 | 20.12 | 175551.9 | 2 (2 0 0 0 0) |
|     | 2049 - 2051                                                                                                      | K.KVEEGVSGLK.K               | 1045.58875 | -0.00368 | 2 | 4.47E-02                                  | 2.36     | 0.20  | 470.2    | 12/18         |
|     | 2492                                                                                                             | K.NNNVIEVTNK.A               | 1144.59570 | -0.00361 | 2 | 6.10E-04                                  | 2.23     | 0.28  | 661.9    | 13/18         |
| 106 | psu PF11_0053   organism=Plasmodium_falciparum_3D7   product=PfSNF2L                                             |                              |            |          |   | location=MAL11:182384-187224(-)   length= | 3.61E-11 | 16.24 | 167335.5 | 2 (1 0 1 0 0) |
|     | 4467                                                                                                             | K.IFDNSEEFDNLFNISK.I         | 1931.90210 | 0.00359  | 2 | 3.61E-11                                  | 4.76     | 0.55  | 1978.9   | 22/30         |
|     | 3107                                                                                                             | K.YDQIKGGVRLFDK.I            | 1538.83252 | -0.09859 | 2 | 2.85E-01                                  | 2.21     | 0.50  | 590.9    | 14/24         |
| 107 | psu PFB0960c   organism=Plasmodium_falciparum_3D7   product=Plasmodium falciparum Maurer's Cleft 2 transmembrane |                              |            |          |   | 5.01E-08                                  | 16.23    |       | 14319.7  | 2 (0 2 0 0 0) |
|     | 4573                                                                                                             | K.KTNLDPQTSSLVRLVDNMNITQEK.K | 2744.42480 | -0.04574 | 3 | 1.13E-03                                  | 4.63     | 0.60  | 1117.9   | 27/92         |
|     | 4693                                                                                                             | K.TNLDPQTSSLVRLVDNMNITQEK.K  | 2616.32983 | -0.04513 | 3 | 5.01E-08                                  | 4.05     | 0.46  | 800.1    | 25/88         |
