# Supplementary material for: A Major Role for the Plasmodium falciparum ApiAP2 Protein PfSIP2 in Chromosome End Biology
Source: PubMed Central journal article supplement (PMC2829057; doi:10.1371/journal.ppat.1000784), 2010-02-26
Supplement: ppat.1000784.s006.pdf [file ppat.1000784.s006.pdf]

**Table S2: SEQUEST search results**

**SPE2M affinity purification (control); 2 unique peptides; orange: detected exclusively in the SPE2M sample; grey: ribosomal proteins**

| Reference   | Peptide                                                                                                          | MH+        | DeltaM   | z | P (pro)  | Score  | Coverage | MW       | Peptide (Hits)  |
|-------------|------------------------------------------------------------------------------------------------------------------|------------|----------|---|----------|--------|----------|----------|-----------------|
| Scan(s)     |                                                                                                                  |            |          |   | P (pep)  | XC     | DeltaCn  | Sp       | Ions            |
| 1           | psu PF11445w   organism=Plasmodium_falciparum_3D7   product=High molecular weight rophtry protein-2   location=M |            |          |   | 3.77E-11 | 340.31 |          | 162560.6 | 34 (34 0 0 0 0) |
| 3786        | K.HLINADDVSPSYINLYR.S                                                                                            | 1990.00281 | 0.00261  | 2 | 3.77E-11 | 6.26   | 0.64     | 2893.4   | 28/32           |
| 4766        | R.LFVTEGTLEYLLLDK.I                                                                                              | 1753.96228 | 0.00212  | 2 | 5.31E-07 | 6.01   | 0.49     | 2677.1   | 25/28           |
| 2849        | K.SLYGNNNNNAGSESDVTLK.S                                                                                          | 2110.96362 | -0.00141 | 2 | 9.76E-10 | 5.55   | 0.54     | 1055.3   | 23/38           |
| 2581        | K.GSQNTEGESEVPSDDEINK.T                                                                                          | 2034.87341 | 0.03228  | 2 | 2.14E-09 | 5.45   | 0.50     | 1164.3   | 26/36           |
| 1477        | K.YGAEQGVGSADSNTK.L                                                                                              | 1483.66589 | 0.00066  | 2 | 8.19E-10 | 5.30   | 0.57     | 1813.8   | 25/28           |
| 3062        | K.NSQNYSLTHTEEMIK.I                                                                                              | 1794.83264 | -0.00325 | 2 | 1.41E-06 | 5.13   | 0.47     | 1065.8   | 18/28           |
| 4569 - 4571 | K.SPDSLDFSIPMNFNFK.N                                                                                             | 1995.92688 | 0.00043  | 3 | 2.10E-07 | 5.03   | 0.44     | 1441.3   | 30/64           |
| 4694 - 4697 | R.VTDAIDVYDFYIK.K                                                                                                | 1708.84692 | 0.00152  | 2 | 1.40E-07 | 4.87   | 0.57     | 1772.7   | 21/26           |
| 3471        | K.KDFTQTNALTNLPNLDNKK.T                                                                                          | 2175.14038 | 0.00260  | 3 | 1.91E-03 | 4.86   | 0.42     | 1338.0   | 34/72           |
| 3749        | K.NNDQLTFLETQVAK.I                                                                                               | 1620.82275 | -0.02973 | 2 | 5.90E-07 | 4.76   | 0.61     | 1725.3   | 21/26           |
| 3621        | K.KDFTQTNALTNLPNLDNK.K                                                                                           | 2047.04541 | 0.02298  | 3 | 1.42E-02 | 4.52   | 0.41     | 924.6    | 30/68           |
| 4801        | K.NFFSELWQNIR.F                                                                                                  | 1453.72229 | 0.00163  | 2 | 4.71E-05 | 4.43   | 0.54     | 1679.0   | 17/20           |
| 3689        | K.NIVSDALTSEEIK.R                                                                                                | 1418.73730 | -0.01545 | 2 | 2.01E-05 | 4.13   | 0.57     | 1204.7   | 19/24           |
| 3510        | K.NIVSDALTSEEIKR.H                                                                                               | 1574.83838 | 0.00481  | 2 | 2.99E-07 | 4.03   | 0.53     | 1733.4   | 20/26           |
| 4058        | K.VFNGIPAFLDK.N                                                                                                  | 1220.66736 | -0.00166 | 2 | 4.28E-06 | 3.98   | 0.46     | 841.6    | 18/20           |
| 4112        | K.LFEQIVDIK.Y                                                                                                    | 1232.68848 | -0.00057 | 2 | 5.10E-03 | 3.94   | 0.18     | 1926.4   | 16/18           |
| 3663        | K.QPYLLMSNVPLNPK.K                                                                                               | 1777.89417 | 0.00309  | 2 | 6.12E-04 | 3.83   | 0.49     | 717.0    | 17/28           |
| 3858        | K.DFTQTNALTNLPNLDNK.K                                                                                            | 1918.95044 | -0.00056 | 2 | 2.37E-06 | 3.77   | 0.58     | 1176.4   | 21/32           |
| 3910        | K.VHDFLVLTQSNNENLLPNK.E                                                                                          | 2168.13452 | 0.00156  | 3 | 6.60E-04 | 3.76   | 0.34     | 703.0    | 30/72           |
| 3285        | K.IDDINNLIYEHK.E                                                                                                 | 1600.79651 | -0.00082 | 3 | 6.00E-04 | 3.72   | 0.34     | 1485.8   | 29/48           |
| 3955 - 3957 | K.YFDEYFFASGGK.I                                                                                                 | 1430.62634 | 0.00115  | 2 | 7.26E-03 | 3.60   | 0.57     | 831.9    | 16/22           |
| 4534        | K.EGNEFLMSILHMK.S                                                                                                | 1548.75488 | 0.00115  | 2 | 2.05E-04 | 3.27   | 0.55     | 562.0    | 16/24           |
| 3969        | K.YIISDDLYVNMK.V                                                                                                 | 1636.79272 | 0.00530  | 2 | 2.07E-06 | 3.27   | 0.57     | 1511.5   | 19/24           |
| 4470        | K.MQVLFITLR.D                                                                                                    | 1120.65466 | -0.00141 | 2 | 1.98E-03 | 3.22   | 0.27     | 914.7    | 14/16           |
| 3937        | K.YNFLDIYK.Q                                                                                                     | 1075.54590 | -0.00179 | 2 | 5.37E-03 | 3.22   | 0.16     | 751.8    | 13/14           |
| 3886        | K.YMTIYINEAYIK.N                                                                                                 | 1521.76575 | 0.00212  | 2 | 2.25E-04 | 3.09   | 0.55     | 1184.0   | 17/22           |
| 3722        | K.YLYMDEYLSEGDK.A                                                                                                | 1625.70398 | 0.00139  | 2 | 5.38E-07 | 3.01   | 0.60     | 1247.3   | 19/24           |
| 2842        | K.YLLDNSNDIKK.V                                                                                                  | 1322.69507 | -0.00252 | 2 | 5.96E-05 | 2.99   | 0.36     | 1883.5   | 18/20           |
| 5849 - 5851 | R.FVYASYILGLVFFIESHIDIAR.L                                                                                       | 2573.38037 | 0.00318  | 3 | 2.78E-07 | 2.95   | 0.58     | 420.4    | 26/84           |
| 4124        | R.SNNIVALYILK.T                                                                                                  | 1247.73584 | 0.00005  | 2 | 4.14E-03 | 2.77   | 0.40     | 775.0    | 16/20           |
| 3361        | K.ADSDITYFVK.Q                                                                                                   | 1158.56775 | -0.00276 | 2 | 1.04E-03 | 2.77   | 0.39     | 796.0    | 14/18           |
| 3223        | K.LPLEDYK.L                                                                                                      | 1040.52991 | -0.00118 | 2 | 3.22E-03 | 2.74   | 0.45     | 491.2    | 13/14           |
| 4065        | K.ELETILNNSPFSEEQTMK.L                                                                                           | 2110.00098 | 0.00224  | 2 | 9.64E-07 | 2.74   | 0.51     | 252.2    | 12/34           |
| 2221        | R.KYVTTTLK.A                                                                                                     | 953.56659  | 0.01531  | 2 | 5.50E-03 | 2.29   | 0.36     | 332.1    | 10/14           |
| 2           | psu PF10_0115   organism=Plasmodium_falciparum_3D7   product=QF122 antigen   location=MAL10:455397-458816(       |            |          |   | 5.02E-13 | 170.36 |          | 131545.0 | 17 (17 0 0 0 0) |
| 4910        | K.NLEEIEEANTYINYLEEQLSITK.N                                                                                      | 2756.35132 | 0.00394  | 3 | 6.36E-11 | 7.22   | 0.60     | 2397.4   | 38/88           |
| 1581        | K.NNNNNNNIISNNNNNNNSDVKK.D                                                                                       | 2714.22217 | 0.00894  | 3 | 2.08E-07 | 5.18   | 0.56     | 762.5    | 28/92           |

|             |                                                                                                                 |            |          |   |          |        |      |          |                 |
|-------------|-----------------------------------------------------------------------------------------------------------------|------------|----------|---|----------|--------|------|----------|-----------------|
| 2006        | R.SKEEMSNNNNNNNSSNGGAFNNSYHESR.Y                                                                                | 3203.30640 | 0.00063  | 4 | 5.02E-13 | 5.00   | 0.56 | 798.8    | 36/168          |
| 4639        | K.IEIEFISTINSTISR.F                                                                                             | 1836.97021 | 0.00152  | 2 | 1.43E-08 | 4.88   | 0.61 | 1825.9   | 24/30           |
| 2826        | K.TSHVAQIYGHEDNIHLAK.D                                                                                          | 2033.01990 | -0.00486 | 4 | 5.40E-11 | 4.52   | 0.57 | 1617.5   | 41/102          |
| 4506        | K.KIEIEFISTINSTISR.F                                                                                            | 1965.06519 | 0.00088  | 3 | 1.25E-05 | 4.37   | 0.57 | 570.2    | 26/64           |
| 3679 - 3681 | K.DVLENLVQSEGK.E                                                                                                | 1330.68494 | 0.00114  | 2 | 4.93E-06 | 4.25   | 0.58 | 2100.2   | 19/22           |
| 4551        | K.ALEMIEELLK.K                                                                                                  | 1188.65442 | -0.00020 | 2 | 4.05E-04 | 3.84   | 0.33 | 1327.2   | 15/18           |
| 3445        | K.QNVDATEADIIR.K                                                                                                | 1386.72229 | 0.02202  | 2 | 2.11E-05 | 3.68   | 0.48 | 1144.4   | 19/22           |
| 1917        | K.NNNNNNNNISNNNNNNNSDVK.K                                                                                       | 2586.12720 | 0.00200  | 2 | 4.13E-07 | 3.59   | 0.59 | 607.7    | 20/44           |
| 2975        | K.EIETNTNLR.M                                                                                                   | 1303.68518 | -0.00300 | 2 | 1.72E-03 | 3.32   | 0.46 | 578.7    | 15/20           |
| 4800        | K.DDIEQFISYLNQVNFENSEN.K                                                                                        | 2417.12549 | 0.00253  | 3 | 1.16E-05 | 3.08   | 0.41 | 704.7    | 24/76           |
| 4188 - 4190 | K.NLNLFIIR.Q                                                                                                    | 1002.60950 | -0.00081 | 2 | 1.10E-01 | 2.96   | 0.23 | 803.9    | 13/14           |
| 3521        | K.ALEILEYSK.N                                                                                                   | 1065.58264 | -0.00154 | 2 | 5.69E-04 | 2.45   | 0.37 | 621.6    | 12/16           |
| 3006        | K.YFVYVDNNK.L                                                                                                   | 1161.55750 | -0.00203 | 2 | 7.12E-04 | 2.30   | 0.46 | 678.8    | 13/16           |
| 1710        | K.LSSADMENK.C                                                                                                   | 994.45099  | -0.00136 | 2 | 3.78E-02 | 2.08   | 0.12 | 619.8    | 13/16           |
| 3801        | K.NLDSEFVPFEKE.E                                                                                                | 1453.68457 | 0.00017  | 2 | 3.02E-05 | 2.07   | 0.51 | 467.1    | 12/22           |
| 3           | gij 81175178 sp P35527 K1C9_HUMAN Keratin, type I cytoskeletal 9 (Cytokeratin-9) (CK-9) (Keratin-9) (K9)        |            |          |   | 4.40E-12 | 160.33 |      | 62091.8  | 16 (16 0 0 0 0) |
| 4673        | K.NYSPYYNTIDDLKDQIVDLTVGNK.T                                                                                    | 2902.41040 | 0.00589  | 3 | 4.40E-12 | 6.56   | 0.51 | 992.9    | 39/96           |
| 1349        | R.GGSGGSYGGGGSGGGYGGGSGSR.G                                                                                     | 1791.72766 | 0.00151  | 2 | 4.51E-12 | 6.36   | 0.71 | 1534.9   | 24/44           |
| 2906        | K.VQALEEANNDLENK.I                                                                                              | 1586.76562 | -0.00031 | 2 | 4.33E-07 | 5.59   | 0.45 | 2728.8   | 23/26           |
| 1330        | R.GSRGGSGGSYGGGGSGGGYGGGSGSR.G                                                                                  | 2091.88232 | 0.00315  | 3 | 1.05E-06 | 5.58   | 0.62 | 2456.5   | 44/100          |
| 1969        | R.SGGGGGGGLGSGGSIR.S                                                                                            | 1232.59778 | 0.02434  | 2 | 4.14E-05 | 4.38   | 0.45 | 1779.2   | 24/30           |
| 3823 - 3825 | K.TLNDMRQEYEQLIAK.N                                                                                             | 1851.92688 | 0.00206  | 2 | 2.25E-06 | 3.81   | 0.39 | 1408.2   | 19/28           |
| 2974        | R.QGVDADINGLR.Q                                                                                                 | 1157.59094 | -0.00447 | 2 | 2.52E-04 | 3.61   | 0.48 | 1008.7   | 18/20           |
| 3767        | R.GGGGSGYSGGGSGGGFASLGGGFGGSR.G                                                                                 | 2705.16113 | -0.00015 | 3 | 2.54E-06 | 3.60   | 0.49 | 1046.2   | 36/124          |
| 3850        | R.LASYLDKVQALEEANNDLENK.I                                                                                       | 2377.18823 | 0.01108  | 3 | 1.52E-03 | 3.30   | 0.33 | 581.5    | 25/80           |
| 2045        | K.STMQELNSR.L                                                                                                   | 1065.49939 | -0.00593 | 2 | 1.01E-04 | 3.18   | 0.34 | 863.6    | 13/16           |
| 3273        | K.TLLDIDNTR.M                                                                                                   | 1060.56335 | -0.00202 | 2 | 2.73E-03 | 2.89   | 0.42 | 674.9    | 14/16           |
| 1654        | R.FSSSSGYGGGSSR.V                                                                                               | 1235.52869 | -0.00130 | 2 | 1.13E-07 | 2.80   | 0.63 | 1248.2   | 18/24           |
| 2338        | K.IGLGGRGGSGGSYGR.G                                                                                             | 1350.68726 | 0.00053  | 2 | 2.46E-02 | 2.74   | 0.32 | 548.3    | 16/28           |
| 3170        | R.IKFEMEQLNR.Q                                                                                                  | 1307.67761 | 0.00129  | 3 | 1.02E-04 | 2.70   | 0.23 | 1245.4   | 20/36           |
| 3298        | R.MTLDDFR.I                                                                                                     | 897.41345  | -0.00080 | 2 | 4.83E-03 | 2.37   | 0.47 | 686.9    | 11/12           |
| 4925        | K.NYSPYYNTIDDLKDQIVDLTVGNKTLIDNTR.M                                                                             | 3943.95605 | 0.00576  | 4 | 3.90E-03 | 2.16   | 0.17 | 227.4    | 33/198          |
| 4           | psu PFD0685c   organism=Plasmodium_falciparum_3D7   product=chromosome associated protein, putative   location= |            |          |   | 2.42E-08 | 160.29 |      | 141136.4 | 16 (16 0 0 0 0) |
| 4790        | K.LESLQEEFENFLEYK.K                                                                                             | 1917.91162 | 0.00261  | 2 | 2.42E-08 | 5.75   | 0.54 | 2478.2   | 23/28           |
| 5021        | R.ENILGFLIDNINVDK.T                                                                                             | 1716.91663 | 0.00175  | 2 | 3.14E-08 | 5.70   | 0.50 | 2839.0   | 24/28           |
| 2162        | K.TQDEDNHLNLSNNK.S                                                                                              | 1755.78918 | -0.00166 | 2 | 1.64E-07 | 4.69   | 0.43 | 1454.1   | 21/28           |
| 2633        | K.SHIEELNNIEK.I                                                                                                 | 1439.71252 | 0.00689  | 2 | 4.71E-06 | 4.10   | 0.56 | 1657.0   | 19/22           |
| 4203 - 4205 | R.LNILMNDFNELK.K                                                                                                | 1463.75623 | 0.00145  | 2 | 6.05E-05 | 3.72   | 0.48 | 1454.5   | 19/22           |
| 3810        | K.LSNMKDEEILNYLK.S                                                                                              | 1709.87781 | 0.00113  | 3 | 4.97E-06 | 3.32   | 0.23 | 952.9    | 26/52           |
| 4721        | K.AVDTILENHYFTLIVEDMQTAK.K                                                                                      | 2551.27490 | 0.00352  | 3 | 1.16E-03 | 3.18   | 0.43 | 576.5    | 21/84           |
| 3915        | K.NINQINEFILR.V                                                                                                 | 1373.75354 | -0.00020 | 2 | 9.24E-05 | 3.12   | 0.46 | 1257.5   | 16/20           |
| 2991 - 2993 | K.VGSTDINSLNDEVK.K                                                                                              | 1490.73328 | -0.00105 | 2 | 4.94E-06 | 3.12   | 0.42 | 875.6    | 17/26           |

|             |                                                                                                                 |            |          |   |          |        |      |          |                 |
|-------------|-----------------------------------------------------------------------------------------------------------------|------------|----------|---|----------|--------|------|----------|-----------------|
| 2805        | K.ISEGTTNLNEIK.C                                                                                                | 1318.68494 | -0.00215 | 2 | 1.09E-03 | 2.93   | 0.41 | 676.7    | 14/22           |
| 4418 - 4420 | K.LTIVPLLNK.K                                                                                                   | 1123.74487 | 0.00237  | 2 | 1.16E-04 | 2.92   | 0.41 | 583.4    | 15/18           |
| 3533        | K.NNEINMLLSK.N                                                                                                  | 1175.60889 | 0.00310  | 2 | 1.06E-01 | 2.92   | 0.36 | 786.1    | 13/18           |
| 2666        | K.YGSEINELNNK.S                                                                                                 | 1280.61169 | 0.00091  | 2 | 3.43E-04 | 2.73   | 0.48 | 1023.8   | 18/20           |
| 3250        | K.NIYEETQMLK.S                                                                                                  | 1268.61914 | -0.00325 | 2 | 3.68E-02 | 2.61   | 0.21 | 411.6    | 12/18           |
| 2963        | K.FNEFNYPNDK.N                                                                                                  | 1287.56409 | -0.00435 | 2 | 5.64E-03 | 2.60   | 0.30 | 1207.3   | 15/18           |
| 4131        | K.VLLPQGIQELEEYR.T                                                                                              | 1686.90613 | 0.00224  | 2 | 2.03E-04 | 2.07   | 0.49 | 172.7    | 12/26           |
| 5           | psu PFI0265c   organism=Plasmodium_falciparum_3D7   product=RhopH3   location=MAL9:270738-274787(-)   length-   |            |          |   | 2.38E-13 | 160.29 |      | 104789.1 | 16 (16 0 0 0 0) |
| 2546        | K.STSAASTSDEISGSEGPSTESTSTGNQGEDK.T                                                                             | 3004.26221 | 0.00712  | 2 | 2.38E-13 | 5.74   | 0.74 | 1060.8   | 24/60           |
| 4281        | R.TMYLDFESSDIFSR.E                                                                                              | 1710.76794 | 0.01128  | 2 | 1.13E-07 | 5.53   | 0.64 | 2982.3   | 23/26           |
| 3162        | K.EMEELEEAEGTSNLK.K                                                                                             | 1708.75818 | -0.00166 | 2 | 4.67E-08 | 4.97   | 0.59 | 2722.4   | 23/28           |
| 4524 - 4526 | K.VFTALYNFDSFIK.T                                                                                               | 1564.80457 | 0.00194  | 2 | 9.64E-06 | 4.79   | 0.41 | 1222.3   | 19/24           |
| 3213        | R.KQDVLYETDKPQTMDEASYEETVDEDAHVNK.Q                                                                             | 3893.72949 | 0.00416  | 5 | 2.71E-07 | 4.61   | 0.49 | 1523.6   | 54/256          |
| 3286        | K.TKDQDLEIELYK.Y                                                                                                | 1494.76868 | 0.00139  | 2 | 1.34E-06 | 4.53   | 0.43 | 1538.2   | 19/22           |
| 3406        | K.ASLHVPSVLYR.R                                                                                                 | 1241.70007 | 0.00208  | 3 | 7.75E-03 | 4.18   | 0.48 | 1250.0   | 25/40           |
| 4007        | K.NYLDVQNLDTTECFK.K                                                                                             | 1788.81091 | 0.00139  | 2 | 3.30E-09 | 3.99   | 0.57 | 1354.7   | 22/28           |
| 2303        | K.EDNSEIQCQNVK.K                                                                                                | 1434.62781 | 0.00713  | 2 | 1.43E-04 | 3.75   | 0.46 | 1188.2   | 18/22           |
| 3589        | K.ELSHNITDFSFK.E                                                                                                | 1437.70093 | 0.00578  | 2 | 5.06E-05 | 3.69   | 0.49 | 622.5    | 19/22           |
| 2877        | K.NLYSTVEDEQR.K                                                                                                 | 1353.62805 | -0.00166 | 2 | 2.54E-04 | 3.65   | 0.45 | 1261.5   | 17/20           |
| 3325        | K.QDVLYETDKPQTMDEASYEETVDEDAHVNK.Q                                                                              | 3765.63452 | -0.00390 | 5 | 3.94E-04 | 3.20   | 0.41 | 925.7    | 48/248          |
| 4220        | R.LFFTYNFGDVEPQGGK.Y                                                                                            | 1761.84827 | 0.00505  | 2 | 1.01E-06 | 2.71   | 0.50 | 436.6    | 14/28           |
| 2785        | K.SGAPISPVSVK.E                                                                                                 | 1041.59387 | 0.01213  | 2 | 4.37E-03 | 2.59   | 0.42 | 321.7    | 15/20           |
| 3115 - 3117 | K.YTYFPVK.E                                                                                                     | 917.47675  | 0.00026  | 2 | 1.18E-02 | 2.26   | 0.39 | 354.6    | 10/12           |
| 2655 - 2657 | R.YTSLYIHK.F                                                                                                    | 1024.54626 | -0.00062 | 2 | 7.72E-02 | 2.01   | 0.40 | 341.5    | 10/14           |
| 6           | psu PFC0120w   organism=Plasmodium_falciparum_3D7   product=Cytoadherence linked asexual protein, 3.2   locatio |            |          |   | 2.87E-09 | 158.25 |      | 167134.0 | 16 (15 1 0 0 0) |
| 2659        | K.EANEENTFPEQEENR.Q                                                                                             | 1932.82056 | 0.00639  | 2 | 8.58E-07 | 5.01   | 0.62 | 785.7    | 21/30           |
| 4516        | K.NITDADDETYIIPVQSTFHDIVK.Y                                                                                     | 2735.34106 | 0.00303  | 3 | 4.03E-06 | 4.85   | 0.55 | 563.9    | 32/92           |
| 3565        | K.YGYLGEVIAAR.L                                                                                                 | 1211.64185 | 0.00529  | 2 | 6.88E-07 | 4.50   | 0.52 | 1431.7   | 18/20           |
| 3941        | K.SPESFFFTHGLAAEASK.Y                                                                                           | 1825.87549 | 0.00058  | 3 | 3.37E-05 | 4.40   | 0.63 | 740.3    | 25/64           |
| 3161        | K.EQSIEIYNSDISDK.I                                                                                              | 1640.76501 | -0.00056 | 2 | 9.85E-05 | 4.27   | 0.58 | 1073.5   | 19/26           |
| 1410        | K.EQTQHVQEQTYSER.K                                                                                              | 1675.76709 | -0.00166 | 2 | 2.87E-09 | 3.74   | 0.57 | 1116.5   | 19/24           |
| 3771        | K.TVVVTNYWYPSPIK.K                                                                                              | 1567.81555 | 0.00151  | 2 | 2.03E-05 | 3.61   | 0.47 | 1476.5   | 18/24           |
| 3962        | K.SALEELNNVFTNK.E                                                                                               | 1478.74854 | 0.00029  | 2 | 8.15E-07 | 3.57   | 0.62 | 1773.3   | 19/24           |
| 2575        | K.YHNIYNINNK.L                                                                                                  | 1292.63818 | 0.02373  | 2 | 9.43E-06 | 3.26   | 0.43 | 1017.2   | 16/18           |
| 3357        | K.DSNLLNITK.C                                                                                                   | 1131.60046 | -0.00202 | 2 | 4.00E-04 | 2.92   | 0.42 | 993.8    | 15/18           |
| 2554        | R.KYMTATPVYK.K                                                                                                  | 1201.62854 | 0.03349  | 2 | 1.48E-02 | 2.88   | 0.38 | 703.8    | 14/18           |
| 2635 - 2637 | R.EIEIHNSMASR.Y                                                                                                 | 1286.61572 | 0.00396  | 2 | 2.18E-04 | 2.85   | 0.44 | 449.0    | 17/20           |
| 3855 - 3857 | K.YFINYAIK.L                                                                                                    | 1144.64014 | -0.00234 | 2 | 1.83E-03 | 2.83   | 0.35 | 638.0    | 15/16           |
| 3459 - 3461 | K.HIPNNLVDELEK.L                                                                                                | 1420.74304 | 0.00304  | 2 | 6.70E-07 | 2.56   | 0.47 | 293.5    | 15/22           |
| 3762        | R.SYPLSLVLEHK.F                                                                                                 | 1285.71509 | -0.01021 | 2 | 3.76E-03 | 2.56   | 0.53 | 227.7    | 13/20           |
| 3475        | K.ILEFSMSDR.F                                                                                                   | 1097.52954 | -0.00129 | 2 | 4.14E-04 | 2.51   | 0.42 | 715.5    | 14/16           |
| 7           | gj 11935049 gb AAG41947.1 AF304164_1 keratin 1 [Homo sapiens]                                                   |            |          |   | 2.22E-15 | 150.38 |      | 66027.0  | 15 (15 0 0 0 0) |

|             |                                                                                                               |            |          |   |          |        |      |          |                 |
|-------------|---------------------------------------------------------------------------------------------------------------|------------|----------|---|----------|--------|------|----------|-----------------|
| 2481        | R.GSYGSGGSSYSGGGSYSGGGGGGGHGSYSGSSSSGGYR.G                                                                    | 3312.30811 | 0.00644  | 3 | 2.22E-15 | 7.36   | 0.64 | 1418.6   | 40/152          |
| 1745        | R.GGGGGGYSGGSSYSGGGSYSGGGGGGGGR.G                                                                             | 2383.95190 | 0.00249  | 2 | 8.60E-12 | 6.43   | 0.71 | 1133.9   | 24/60           |
| 3347        | K.SKAEAESLYQSKYEELQITAGR.H                                                                                    | 2501.25171 | 0.00669  | 3 | 2.76E-09 | 5.96   | 0.60 | 1816.3   | 37/84           |
| 4244        | K.NKLNLEDALQQAKEDLAR.L                                                                                        | 2184.12549 | 0.00284  | 3 | 3.64E-07 | 5.53   | 0.52 | 1426.0   | 34/72           |
| 4942        | R.SLDLDSIIAEVKAQYEDIAQSK.A                                                                                    | 2564.34546 | -0.00009 | 3 | 4.61E-08 | 5.11   | 0.58 | 953.2    | 33/88           |
| 1990        | K.SKAEAESLYQSK.Y                                                                                              | 1340.66919 | -0.00288 | 2 | 3.59E-06 | 4.50   | 0.51 | 1470.6   | 19/22           |
| 4397 - 4399 | R.SLDLDSIIAEVK.A                                                                                              | 1302.71509 | 0.00383  | 2 | 1.21E-04 | 4.05   | 0.45 | 1674.5   | 19/22           |
| 5005        | R.SLDLDSIIAEVKAQYEDIAQK.S                                                                                     | 2349.21851 | 0.00664  | 2 | 8.06E-06 | 3.87   | 0.56 | 1211.9   | 21/40           |
| 3166        | K.QISNLQQSISDAEQR.G                                                                                           | 1716.85107 | 0.00176  | 2 | 2.52E-11 | 3.85   | 0.64 | 1711.7   | 22/28           |
| 4374        | R.THNLEPYFESFINNLR.R                                                                                          | 2150.07788 | 0.00405  | 4 | 2.70E-03 | 3.21   | 0.32 | 711.7    | 30/96           |
| 2799        | R.TNAENEFVTIKK.D                                                                                              | 1393.73218 | -0.00374 | 2 | 8.86E-03 | 3.17   | 0.54 | 1436.6   | 17/22           |
| 2197        | K.AQYEDIAQK.S                                                                                                 | 1065.52112 | 0.02885  | 2 | 6.18E-03 | 3.14   | 0.33 | 494.5    | 13/16           |
| 1669        | R.LRSEIDNVKK.Q                                                                                                | 1201.68994 | -0.00521 | 3 | 4.21E-01 | 2.93   | 0.16 | 1009.2   | 20/36           |
| 2987 - 2989 | K.IEISELNR.V                                                                                                  | 973.53131  | -0.00160 | 2 | 5.92E-03 | 2.80   | 0.28 | 647.6    | 13/14           |
| 3977        | K.SLNNQFASFIDKVR.F                                                                                            | 1638.85986 | -0.00149 | 3 | 2.82E-06 | 2.68   | 0.51 | 517.0    | 27/52           |
| 8           | psu PF14_0316   organism=Plasmodium_falciparum_3D7   product=DNA topoisomerase II, putative   location=MAL14: |            |          |   | 3.94E-10 | 140.24 |      | 169121.8 | 14 (14 0 0 0 0) |
| 3415        | R.ISVYNDGEGIPVDIHK.E                                                                                          | 1755.89124 | -0.00093 | 2 | 2.07E-08 | 4.83   | 0.60 | 816.2    | 21/30           |
| 3370        | K.EKDLSYYDFVNK.E                                                                                              | 1520.72681 | 0.00114  | 2 | 3.92E-05 | 3.98   | 0.35 | 1405.8   | 19/22           |
| 3989        | K.STLTTTNTMLFDPNLK.L                                                                                          | 1796.90991 | 0.00078  | 2 | 1.18E-06 | 3.91   | 0.62 | 1377.6   | 19/30           |
| 4268        | K.EFLEELLTDEK.H                                                                                               | 1365.67834 | 0.00347  | 2 | 1.22E-03 | 3.73   | 0.31 | 1730.9   | 17/20           |
| 1875        | K.NNNNNNNNNNDEDEIVK.I                                                                                         | 1873.79065 | -0.00008 | 2 | 3.94E-10 | 3.72   | 0.45 | 679.8    | 19/30           |
| 3257        | R.DGDSIDMAFSK.K                                                                                               | 1185.50928 | -0.00020 | 2 | 4.52E-02 | 3.64   | 0.50 | 914.2    | 15/20           |
| 4406 - 4410 | K.GFLSEFVTPIVK.V                                                                                              | 1336.75110 | 0.00310  | 2 | 1.37E-03 | 2.76   | 0.44 | 850.2    | 15/22           |
| 3541        | R.IMGLDITDK.N                                                                                                 | 1005.52850 | 0.00451  | 2 | 1.79E-04 | 2.76   | 0.19 | 383.8    | 13/16           |
| 3625        | R.YGSLMIMTDQDYDGGSHIK.G                                                                                       | 2073.92554 | 0.00717  | 3 | 1.91E-04 | 2.76   | 0.42 | 625.9    | 24/68           |
| 4145        | K.IMFLWTGDR.D                                                                                                 | 1138.57141 | 0.00041  | 2 | 2.29E-01 | 2.72   | 0.20 | 539.1    | 11/16           |
| 4019 - 4021 | K.IDNDTLEITELPIK.K                                                                                            | 1613.86328 | 0.00060  | 2 | 8.82E-03 | 2.59   | 0.38 | 425.6    | 14/26           |
| 3642        | K.DLSYYDFVNK.E                                                                                                | 1263.58923 | 0.00176  | 2 | 7.06E-04 | 2.57   | 0.46 | 832.0    | 14/18           |
| 3555        | K.GLLINMIHK.F                                                                                                 | 1038.61279 | 0.00567  | 2 | 3.80E-03 | 2.33   | 0.19 | 1104.3   | 13/16           |
| 3933        | R.NITVETMWLK.D                                                                                                | 1234.65002 | 0.00005  | 2 | 6.36E-03 | 2.01   | 0.37 | 256.6    | 10/18           |
| 9           | psu PF11_0317   organism=Plasmodium_falciparum_3D7   product=structural maintenance of chromosome protein, pu |            |          |   | 2.52E-11 | 120.29 |      | 214541.8 | 12 (12 0 0 0 0) |
| 2266        | K.NMENDKINNEKENMEK.E                                                                                          | 2094.90674 | 0.01572  | 3 | 2.52E-11 | 5.56   | 0.39 | 1693.3   | 32/64           |
| 3702        | K.EESLQFEQDILNQNK.K                                                                                           | 1834.88171 | -0.00117 | 2 | 1.84E-05 | 4.61   | 0.52 | 1705.5   | 20/28           |
| 2729        | K.MNSHIDQQDQNESNVHLNENIK.K                                                                                    | 2721.22803 | -0.00450 | 4 | 9.60E-06 | 4.20   | 0.28 | 1571.9   | 41/132          |
| 3602        | K.NLNNLNQELNQLR.D                                                                                             | 1582.82959 | 0.00762  | 2 | 7.22E-06 | 3.54   | 0.49 | 912.0    | 20/24           |
| 4426        | K.IDNIYEIIEHNLR.D                                                                                             | 1641.85950 | 0.00455  | 3 | 2.50E-01 | 3.23   | 0.34 | 545.7    | 23/48           |
| 4463 - 4465 | R.MDFIPYENFVSNLK.K                                                                                            | 1716.83020 | 0.00304  | 2 | 1.79E-06 | 3.16   | 0.52 | 489.8    | 17/26           |
| 3790        | K.FMENLNLQIK.E                                                                                                | 1249.66089 | 0.00139  | 2 | 3.24E-04 | 3.08   | 0.37 | 999.3    | 16/18           |
| 2766        | K.LAYDQLNER.I                                                                                                 | 1121.55859 | -0.00239 | 2 | 8.85E-05 | 2.96   | 0.47 | 921.9    | 15/16           |
| 4822        | K.IHIDSTNNYENPYENYNIIEFIENIDEYKK.C                                                                            | 3734.74976 | -0.00670 | 4 | 4.61E-03 | 2.70   | 0.25 | 794.5    | 35/174          |
| 2274        | K.LNINNHDDMK.I                                                                                                | 1213.56299 | 0.00383  | 2 | 6.12E-03 | 2.66   | 0.36 | 710.7    | 14/18           |
| 2115        | K.ESNEQIDNIQK.I                                                                                               | 1317.62805 | -0.00166 | 2 | 1.57E-03 | 2.48   | 0.32 | 848.1    | 15/20           |

|    |                             |                                    |                                              |                       |   |          |        |      |          |                 |
|----|-----------------------------|------------------------------------|----------------------------------------------|-----------------------|---|----------|--------|------|----------|-----------------|
|    | 1689                        | K.VMENYEQK.I                       | 1040.47168                                   | -0.00105              | 2 | 1.57E-03 | 2.08   | 0.39 | 501.7    | 12/14           |
| 10 | gij40354192 ref NP_000412.2 | keratin 10 [Homo sapiens]          |                                              |                       |   | 4.23E-11 | 120.27 |      | 58791.5  | 12 (12 0 0 0 0) |
|    | 3453                        | K.GSLGGGFSSGGFSGGSFSR.G            | 1707.77209                                   | 0.00567               | 2 | 4.23E-11 | 5.32   | 0.66 | 1517.8   | 23/36           |
|    | 4973                        | K.TIDDLKNQILNLTDDNANILLQIDNAR.L    | 3052.62720                                   | 0.00626               | 3 | 6.83E-04 | 4.58   | 0.46 | 1614.3   | 32/104          |
|    | 2795                        | R.ALEESNYELEGK.I                   | 1381.64819                                   | -0.00239              | 2 | 1.53E-05 | 4.46   | 0.60 | 2192.7   | 19/22           |
|    | 5234                        | R.VLDELTLTKADLEMQIESLTEELAYLKK.N   | 3236.72217                                   | -0.00010              | 4 | 1.43E-07 | 4.06   | 0.47 | 734.9    | 39/162          |
|    | 2199                        | R.SQYEQLAEQNRK.D                   | 1493.73425                                   | 0.00383               | 2 | 5.04E-04 | 3.77   | 0.44 | 1273.7   | 17/22           |
|    | 2446                        | R.SLLEGEESGGGGR.G                  | 1262.59717                                   | -0.00142              | 2 | 1.32E-06 | 3.77   | 0.48 | 1372.6   | 21/26           |
|    | 2645                        | R.LENEIQTYR.S                      | 1165.58484                                   | 0.00127               | 2 | 3.16E-04 | 3.69   | 0.14 | 1153.3   | 15/16           |
|    | 5072                        | K.ADLEMQIESLTEELAYLKK.K            | 2096.04688                                   | 0.00552               | 3 | 5.02E-05 | 3.50   | 0.52 | 876.8    | 24/68           |
|    | 4667                        | R.NVSTGDVNVEMNAAPGVDLTQLLNNMR.S    | 2872.39282                                   | 0.00242               | 3 | 3.95E-05 | 3.42   | 0.58 | 990.8    | 31/104          |
|    | 2457                        | R.SQYEQLAEQNRK.K                   | 1365.63928                                   | -0.00178              | 2 | 9.53E-05 | 3.22   | 0.41 | 1291.0   | 17/20           |
|    | 2542                        | K.YENEVALR.Q                       | 993.50000                                    | 0.00511               | 2 | 9.02E-03 | 3.09   | 0.32 | 1000.4   | 14/14           |
|    | 3566                        | R.SQYEQLAEQNRKDAEAWFNEK.S          | 2584.20630                                   | 0.01210               | 4 | 1.62E-02 | 1.96   | 0.35 | 181.9    | 29/120          |
| 11 | psu MAL7P1.229              | organism=Plasmodium_falciparum_3D7 | product=Cytoadherence linked asexual protein | location=             |   | 1.34E-11 | 110.32 |      | 162677.5 | 11 (11 0 0 0 0) |
|    | 2958                        | K.NVNNENLNGDSNPNDNINQLK.S          | 2226.03809                                   | -0.00069              | 2 | 1.34E-11 | 4.23   | 0.62 | 1250.9   | 25/38           |
|    | 5208                        | K.NVDDILFFADIINIR.K                | 1777.94836                                   | 0.00237               | 2 | 6.71E-05 | 4.06   | 0.50 | 1774.2   | 19/28           |
|    | 4417                        | K.HLPNNLLDELLR.Q                   | 1446.80640                                   | 0.00688               | 2 | 2.20E-06 | 3.77   | 0.55 | 446.0    | 17/22           |
|    | 3683 - 3685                 | R.NILNVVDEVNK.S                    | 1256.68445                                   | -0.00014              | 2 | 1.41E-04 | 3.74   | 0.49 | 1201.0   | 17/20           |
|    | 3003 - 3005                 | K.GEAILGDTK.I                      | 1016.56226                                   | -0.00408              | 2 | 2.60E-02 | 2.95   | 0.36 | 1078.6   | 14/18           |
|    | 3874                        | K.EQSIESYNANISDLIK.K               | 1823.90210                                   | -0.00032              | 2 | 3.37E-10 | 2.91   | 0.61 | 912.9    | 18/30           |
|    | 3569                        | K.LILDSLENDK.L                     | 1159.62048                                   | 0.00518               | 2 | 1.76E-04 | 2.87   | 0.39 | 717.4    | 16/18           |
|    | 3246                        | R.GYLDEAMEAR.I                     | 1154.51465                                   | 0.00114               | 2 | 3.80E-03 | 2.80   | 0.38 | 698.6    | 13/18           |
|    | 4610                        | K.SINDADDDIYIVPTIQSSFYDIAK.Y       | 2703.30347                                   | 0.00137               | 3 | 2.50E-04 | 2.75   | 0.37 | 395.0    | 22/92           |
|    | 1850                        | R.YAMENMHK.I                       | 1023.43866                                   | -0.00099              | 2 | 1.46E-03 | 2.26   | 0.50 | 547.2    | 12/14           |
|    | 3030                        | K.IALEELNK.V                       | 929.53021                                    | 0.00182               | 2 | 8.66E-03 | 2.25   | 0.27 | 540.2    | 12/14           |
| 12 | psu PFF0835w                | organism=Plasmodium_falciparum_3D7 | product=hypothetical protein, conserved      | location=MAL6:71      |   | 1.62E-07 | 110.28 |      | 52947.8  | 11 (11 0 0 0 0) |
|    | 3333                        | K.IENEASKYDDETIVPLK.S              | 1963.98584                                   | -0.00119              | 3 | 4.07E-07 | 4.76   | 0.53 | 1560.5   | 31/64           |
|    | 3717                        | K.LLINQIQALNK.N                    | 1267.77319                                   | 0.02007               | 2 | 5.51E-05 | 4.52   | 0.43 | 1630.4   | 18/20           |
|    | 3353                        | K.LGSISQSIDEIK.K                   | 1289.69470                                   | -0.00142              | 2 | 7.47E-05 | 4.18   | 0.43 | 1135.7   | 18/22           |
|    | 5153                        | R.EELALIENMLAYLK.K                 | 1649.88184                                   | 0.00114               | 2 | 1.62E-07 | 4.13   | 0.48 | 2501.7   | 23/26           |
|    | 2259 - 2261                 | K.LKELQNSYQEK.N                    | 1379.71655                                   | 0.01055               | 2 | 3.10E-04 | 3.63   | 0.44 | 1014.9   | 16/20           |
|    | 3303                        | K.YDDETIVPLK.S                     | 1192.60962                                   | -0.00239              | 2 | 2.72E-05 | 3.35   | 0.51 | 1332.7   | 16/18           |
|    | 3077                        | K.QIGFENEEDIEK.K                   | 1450.66968                                   | -0.00008              | 2 | 3.07E-03 | 3.32   | 0.49 | 942.1    | 15/22           |
|    | 2745                        | K.MNHYFMER.R                       | 1127.47607                                   | -0.00154              | 2 | 8.66E-04 | 2.88   | 0.44 | 811.4    | 13/14           |
|    | 2911                        | K.IEKPDFDAYNEK.L                   | 1468.69543                                   | -0.00007              | 2 | 1.24E-04 | 2.53   | 0.39 | 431.8    | 15/22           |
|    | 2499                        | K.NKPLLSSYSK.I                     | 1136.63098                                   | 0.00078               | 2 | 7.25E-02 | 2.25   | 0.37 | 120.5    | 10/18           |
|    | 3698                        | K.LEDIDVLPYR.E                     | 1232.65210                                   | 0.00139               | 2 | 1.73E-02 | 2.17   | 0.36 | 469.2    | 13/18           |
| 13 | psu PF13_0305               | organism=Plasmodium_falciparum_3D7 | product=elongation factor 1 alpha            | location=MAL13:226521 |   | 5.26E-10 | 90.32  |      | 48927.9  | 9 (9 0 0 0 0)   |
|    | 4323 - 4325                 | K.VGYQADKVDVIPISGFEGDNLIEK.S       | 2654.33472                                   | 0.01221               | 3 | 8.44E-10 | 6.31   | 0.55 | 1628.8   | 37/92           |
|    | 3395                        | K.EVLEEARPGDNIGFNVK.N              | 1886.96069                                   | 0.00152               | 2 | 2.68E-08 | 5.63   | 0.56 | 960.7    | 19/32           |
|    | 4808                        | K.NMITGTSQADVALLVVP AEVGGFEGAFSK.E | 2908.47607                                   | 0.00376               | 3 | 5.26E-10 | 5.41   | 0.63 | 1532.7   | 41/112          |

|    |                                                                                                                  |                              |            |          |   |          |               |      |        |        |
|----|------------------------------------------------------------------------------------------------------------------|------------------------------|------------|----------|---|----------|---------------|------|--------|--------|
|    | 4383 - 4385                                                                                                      | K.VDFIPISGFEGDNLIK.S         | 1892.96399 | 0.00774  | 2 | 8.89E-07 | 5.41          | 0.60 | 1068.0 | 25/32  |
|    | 3794                                                                                                             | K.KPMVVETFTFEPPLGR.F         | 1863.96729 | 0.00090  | 2 | 3.64E-08 | 4.71          | 0.64 | 1910.3 | 22/30  |
|    | 3643                                                                                                             | K.FTAQVILNHPGEIK.N           | 1679.94788 | -0.00851 | 3 | 2.84E-07 | 3.88          | 0.45 | 703.5  | 27/56  |
|    | 3734                                                                                                             | R.YFFTVIDAPGHK.D             | 1394.71033 | -0.00003 | 3 | 4.42E-06 | 3.31          | 0.49 | 944.5  | 27/44  |
|    | 3225                                                                                                             | K.SGDSALVSLEPK.K             | 1202.62634 | 0.00017  | 2 | 3.01E-04 | 3.14          | 0.49 | 1792.3 | 18/22  |
|    | 3018                                                                                                             | K.FLNIDSK.I                  | 836.45123  | -0.01637 | 2 | 1.73E-01 | 2.04          | 0.17 | 503.8  | 10/12  |
| 14 | psu PF14_0102   organism=Plasmodium_falciparum_3D7   product=rhoptry-associated protein 1, RAP1   location=MAL   |                              | 1.60E-06   | 78.24    |   | 89996.4  | 8 (7 1 0 0 0) |      |        |        |
|    | 4266                                                                                                             | R.TMVTIINDYFEAK.K            | 1544.76648 | 0.00249  | 2 | 7.16E-05 | 4.79          | 0.43 | 1019.6 | 18/24  |
|    | 3971                                                                                                             | K.YSLNNMEENINILK.N           | 1694.84180 | 0.00419  | 2 | 1.60E-06 | 4.12          | 0.36 | 1258.0 | 19/26  |
|    | 3901                                                                                                             | K.FHPNIDYLTADGYK.L           | 1766.87476 | -0.00021 | 3 | 4.03E-05 | 4.00          | 0.38 | 1569.8 | 28/56  |
|    | 3819 - 3821                                                                                                      | K.TFSGIGFNLTEK.E             | 1313.67358 | 0.01214  | 2 | 3.80E-05 | 3.61          | 0.58 | 990.7  | 18/22  |
|    | 3070                                                                                                             | K.TDMLSLQNEESK.I             | 1394.64673 | -0.00240 | 2 | 6.58E-04 | 3.26          | 0.38 | 817.2  | 18/22  |
|    | 3159                                                                                                             | R.ESMISTTFEQQK.E             | 1428.66748 | -0.00056 | 2 | 1.74E-05 | 2.86          | 0.43 | 982.3  | 17/22  |
|    | 3086                                                                                                             | K.LHVITSGLSYK.A              | 1217.68884 | 0.03399  | 2 | 3.37E-06 | 2.86          | 0.43 | 843.9  | 16/20  |
|    | 3454                                                                                                             | K.TLEEFK.K                   | 879.48224  | 0.02171  | 2 | 3.88E-02 | 2.20          | 0.10 | 338.5  | 11/12  |
| 15 | psu PFF1185w   organism=Plasmodium_falciparum_3D7   product=iswi protein homologue   location=MAL6:999525-10     |                              | 2.71E-10   | 70.37    |   | 315421.1 | 7 (7 0 0 0 0) |      |        |        |
|    | 3906                                                                                                             | R.RPLVDNVQLKPHQEDGVWLLK.S    | 2613.41479 | -0.00058 | 4 | 2.71E-10 | 7.35          | 0.46 | 4028.8 | 54/126 |
|    | 3251                                                                                                             | R.IDALDQQYEDQLR.K            | 1606.77075 | 0.00066  | 2 | 4.67E-07 | 4.53          | 0.55 | 2469.4 | 21/24  |
|    | 4448                                                                                                             | K.SFLTGGAILADEMGLGK.T        | 1679.86731 | -0.00044 | 2 | 1.31E-09 | 4.22          | 0.64 | 2746.5 | 25/32  |
|    | 3346                                                                                                             | K.GVGTTFSLSDGSMR.F           | 1327.63110 | -0.00032 | 2 | 1.80E-06 | 4.08          | 0.59 | 1513.9 | 20/24  |
|    | 1681                                                                                                             | K.NISGEEHIESSK.L             | 1416.66016 | -0.00484 | 2 | 6.15E-06 | 3.93          | 0.57 | 1231.3 | 20/24  |
|    | 2421                                                                                                             | K.SLYSNYQDK.A                | 1117.51599 | -0.00251 | 2 | 3.81E-02 | 2.27          | 0.26 | 491.7  | 12/16  |
|    | 3222                                                                                                             | K.DLQPFVNPR.V                | 1085.57385 | -0.00093 | 2 | 4.99E-02 | 2.09          | 0.33 | 414.4  | 12/16  |
| 16 | psu PFE0060w   organism=Plasmodium_falciparum_3D7   product=hypothetical protein   location=MAL5:64065-65489     |                              | 9.55E-09   | 70.29    |   | 48690.3  | 7 (7 0 0 0 0) |      |        |        |
|    | 4337                                                                                                             | R.TLILGSFPQAGEILR.E          | 1614.92139 | 0.00773  | 2 | 2.68E-07 | 5.71          | 0.51 | 1454.0 | 24/28  |
|    | 1443 - 1445                                                                                                      | K.NHEESNANMNNHNSFNDK.S       | 2115.85327 | -0.00387 | 3 | 7.33E-08 | 4.83          | 0.64 | 1620.6 | 37/68  |
|    | 3746                                                                                                             | K.FSYALDPNDYASIEDK.L         | 1847.83337 | -0.00300 | 2 | 9.55E-09 | 4.13          | 0.65 | 1220.4 | 23/30  |
|    | 2414                                                                                                             | K.NEQDTNNTHTPNHDEYSHNLPK.N   | 2605.12988 | -0.00254 | 4 | 9.94E-02 | 3.62          | 0.33 | 572.5  | 35/126 |
|    | 2950                                                                                                             | K.HLLQQINTYK.H               | 1257.69495 | -0.00301 | 2 | 4.00E-06 | 3.25          | 0.51 | 963.6  | 16/18  |
|    | 2489                                                                                                             | K.HEEVHKPEEFHKPEEFHK.H       | 2313.10474 | 0.00467  | 5 | 3.75E-02 | 2.92          | 0.25 | 1695.9 | 45/136 |
|    | 1733                                                                                                             | K.HEENHKPQMVQAPPEK.E         | 1955.93921 | -0.00132 | 4 | 9.07E-02 | 2.65          | 0.42 | 973.7  | 32/96  |
| 17 | psu MAL8P1.105   organism=Plasmodium_falciparum_3D7   product=hypothetical protein, conserved   location=MAL8:   |                              | 3.05E-07   | 70.27    |   | 133674.9 | 7 (7 0 0 0 0) |      |        |        |
|    | 4934                                                                                                             | K.VVNLDFEENIVINETNYIIDHNVK.S | 2844.44141 | 0.00405  | 4 | 3.05E-07 | 4.46          | 0.39 | 761.0  | 38/138 |
|    | 3335                                                                                                             | K.KPNNTTGFYTPQFHIAK.E        | 2065.05005 | 0.00113  | 3 | 6.13E-03 | 4.09          | 0.44 | 756.3  | 27/68  |
|    | 4902                                                                                                             | K.DSHILIFDVLNGDIYEK.K        | 2104.09619 | 0.00127  | 2 | 1.25E-06 | 2.78          | 0.47 | 422.3  | 12/34  |
|    | 4146 - 4148                                                                                                      | K.LNLFSSPYVQELK.K            | 1537.82605 | 0.00414  | 2 | 4.95E-03 | 2.69          | 0.38 | 272.1  | 13/24  |
|    | 3199                                                                                                             | K.NQVIGYYLNK.E               | 1211.64185 | -0.00118 | 2 | 1.91E-03 | 2.62          | 0.38 | 1038.2 | 15/18  |
|    | 3930                                                                                                             | K.EIINDFIIK.G                | 1104.62988 | -0.00117 | 2 | 7.23E-02 | 2.11          | 0.14 | 647.3  | 13/16  |
|    | 3638                                                                                                             | K.IAYLPFSNDK.N               | 1167.60449 | 0.00274  | 2 | 5.40E-04 | 2.04          | 0.36 | 740.2  | 14/18  |
| 18 | gij 14277739 pdb 1HYN P Chain P, Crystal Structure Of The Cytoplasmic Domain Of Human Erythrocyte Band-3 Protein |                              | 2.06E-09   | 70.26    |   | 42509.3  | 7 (7 0 0 0 0) |      |        |        |
|    | 3343 - 3345                                                                                                      | K.HSHAGELEALGGVKPAVLTR.S     | 2042.11414 | -0.00011 | 4 | 2.06E-09 | 5.25          | 0.52 | 2573.2 | 53/114 |
|    | 4876 - 4878                                                                                                      | K.GTVLLDLQETSLAGVANQLLDR.F   | 2326.26123 | 0.00144  | 3 | 1.79E-03 | 5.13          | 0.53 | 1968.0 | 36/84  |

|    |                                                                                                                      |                            |            |          |   |          |       |      |         |               |
|----|----------------------------------------------------------------------------------------------------------------------|----------------------------|------------|----------|---|----------|-------|------|---------|---------------|
|    | 4339                                                                                                                 | R.ADFLEQPVLGVR.L           | 1490.80017 | 0.00725  | 2 | 5.02E-06 | 4.74  | 0.57 | 1293.8  | 19/24         |
|    | 2614                                                                                                                 | R.YQSSPAKPDSSFYK.G         | 1604.75916 | 0.01408  | 2 | 2.51E-07 | 4.44  | 0.57 | 1746.2  | 21/26         |
|    | 4254                                                                                                                 | R.LQEAAELEAVELPVPIR.F      | 1877.03784 | -0.00064 | 3 | 1.09E-03 | 4.06  | 0.48 | 1124.7  | 32/64         |
|    | 3677                                                                                                                 | K.IPPDSEATLVLVGR.A         | 1466.82129 | 0.00676  | 2 | 3.10E-08 | 3.92  | 0.59 | 848.6   | 23/26         |
|    | 3526                                                                                                                 | R.FIFEDQIRPQDR.E           | 1563.79138 | 0.00554  | 2 | 1.75E-02 | 2.57  | 0.21 | 306.6   | 12/22         |
| 19 | gij 112798 sp P16452 EPB42_HUMAN Erythrocyte membrane protein band 4.2 (Erythrocyte protein 4.2) (P4.2)              |                            |            |          |   | 6.97E-12 | 70.23 |      | 76924.7 | 7 (7 0 0 0 0) |
|    | 3258                                                                                                                 | R.VLPTPQTQATQEGALLNK.R     | 1909.03894 | 0.00273  | 2 | 6.97E-12 | 4.49  | 0.57 | 701.1   | 23/34         |
|    | 2351 - 2353                                                                                                          | K.VALTAQTGEQPSK.I          | 1329.70093 | 0.00029  | 2 | 1.59E-03 | 4.09  | 0.53 | 1947.2  | 19/24         |
|    | 2662                                                                                                                 | R.VVTFASAQGTGGR.L          | 1351.69641 | 0.00273  | 2 | 7.40E-06 | 3.19  | 0.39 | 1181.1  | 19/26         |
|    | 1970                                                                                                                 | K.YPEGSLQEKE.E             | 1050.51025 | -0.00178 | 2 | 1.36E-03 | 2.52  | 0.33 | 704.1   | 14/16         |
|    | 4777 - 4782                                                                                                          | K.DNGIRPPSLETASPLYLLLK.A   | 2197.22266 | -0.00037 | 3 | 1.18E-01 | 2.50  | 0.30 | 459.8   | 22/76         |
|    | 2881                                                                                                                 | R.NPPENTFLR.L              | 1087.55310 | -0.00288 | 2 | 1.31E-03 | 2.49  | 0.35 | 569.6   | 12/16         |
|    | 2610                                                                                                                 | K.WSQPVHVAR.V              | 1079.57446 | 0.00835  | 2 | 1.73E-02 | 2.21  | 0.33 | 325.6   | 11/16         |
| 20 | psu PF14_0186   organism=Plasmodium_falciparum_3D7   product=hypothetical protein   location=MAL14:797708-799        |                            |            |          |   | 1.47E-06 | 70.22 |      | 69935.1 | 7 (7 0 0 0 0) |
|    | 2613                                                                                                                 | K.IINDNSNLSAPEK.V          | 1414.71729 | 0.01237  | 2 | 5.32E-04 | 4.44  | 0.42 | 1254.6  | 18/24         |
|    | 2341                                                                                                                 | K.NENNMLDTTNQK.D           | 1421.63257 | -0.00142 | 2 | 4.38E-03 | 3.31  | 0.44 | 609.7   | 16/22         |
|    | 4046                                                                                                                 | K.INFYFLPNQEK.K            | 1412.72083 | 0.00175  | 2 | 1.59E-03 | 3.09  | 0.49 | 1088.4  | 16/20         |
|    | 4739 - 4741                                                                                                          | K.YNIMNIPTMVLDR.N          | 1692.88110 | -0.00019 | 2 | 1.01E-05 | 3.04  | 0.49 | 778.3   | 19/26         |
|    | 2831                                                                                                                 | K.HINNFTYIK.H              | 1149.60510 | -0.00105 | 2 | 3.94E-02 | 2.42  | 0.33 | 812.0   | 15/16         |
|    | 3894                                                                                                                 | K.DNNVNVYIPLDNK.L          | 1630.84351 | 0.00102  | 2 | 1.47E-06 | 2.36  | 0.49 | 595.5   | 15/26         |
|    | 3891                                                                                                                 | K.FFNFLNK.Y                | 929.48798  | -0.00026 | 2 | 2.07E-02 | 2.29  | 0.36 | 460.9   | 10/12         |
| 21 | psu PF08_0032   organism=Plasmodium_falciparum_3D7   product=DnaJ protein, putative   location=MAL8:1044885-1        |                            |            |          |   | 9.62E-08 | 70.21 |      | 76633.7 | 7 (7 0 0 0 0) |
|    | 3355                                                                                                                 | K.LIESNSINLNMK.N           | 1375.72498 | 0.00126  | 2 | 5.61E-05 | 4.16  | 0.54 | 1707.1  | 19/22         |
|    | 3102                                                                                                                 | K.YNEIDNISNESIK.K          | 1538.73328 | 0.00126  | 2 | 9.62E-08 | 4.07  | 0.54 | 2037.8  | 22/24         |
|    | 1945                                                                                                                 | K.TYQINSSYNK.F             | 1331.62268 | -0.00349 | 2 | 4.94E-05 | 3.51  | 0.33 | 1525.8  | 17/20         |
|    | 1597                                                                                                                 | R.KTYQINSSYNK.F            | 1459.71753 | 0.00151  | 2 | 1.89E-06 | 3.18  | 0.41 | 947.3   | 16/22         |
|    | 2961                                                                                                                 | K.MLNDALYK.M               | 967.49170  | -0.00258 | 2 | 9.25E-04 | 2.68  | 0.21 | 544.0   | 13/14         |
|    | 3871 - 3873                                                                                                          | K.DIEILNFQK.I              | 1119.60449 | -0.00172 | 2 | 8.40E-04 | 2.27  | 0.26 | 976.4   | 13/16         |
|    | 3063                                                                                                                 | K.LYNIINR.T                | 905.52032  | -0.02247 | 2 | 1.14E-01 | 2.02  | 0.24 | 559.1   | 11/12         |
| 22 | psu PF14_0368   organism=Plasmodium_falciparum_3D7   product=2-Cys peroxiredoxin   location=MAL14:1575927-15         |                            |            |          |   | 2.96E-09 | 60.26 |      | 21793.3 | 6 (6 0 0 0 0) |
|    | 3849                                                                                                                 | K.GGIGNIQHTLISDITK.S       | 1666.91223 | 0.00212  | 2 | 2.96E-09 | 5.14  | 0.63 | 1891.5  | 21/30         |
|    | 4341                                                                                                                 | K.AEAVFADNTFGEVNLHDFIGK.K  | 2294.10889 | 0.00778  | 3 | 8.83E-04 | 3.46  | 0.49 | 556.9   | 31/80         |
|    | 5593 - 5602                                                                                                          | R.SYNVLFGDVSLR.A           | 1456.74304 | 0.00135  | 2 | 4.02E-05 | 2.83  | 0.38 | 775.6   | 16/24         |
|    | 3839                                                                                                                 | K.QGVVQHLLVNNLAIGR.S       | 1731.00244 | -0.01741 | 2 | 6.22E-08 | 2.60  | 0.49 | 363.0   | 14/30         |
|    | 3319                                                                                                                 | R.NVELIGCSVDSK.Y           | 1263.62488 | -0.00118 | 2 | 1.29E-03 | 2.60  | 0.26 | 411.7   | 13/22         |
|    | 3317                                                                                                                 | R.AFVLIDK.Q                | 805.48181  | -0.00032 | 2 | 6.09E-02 | 2.52  | 0.19 | 445.3   | 10/12         |
| 23 | gij 547754 sp P35908.1 K22E_HUMAN Keratin, type II cytoskeletal 2 epidermal (Cytokeratin-2e) (CK 2e) (K2e) (keratin- |                            |            |          |   | 1.13E-11 | 60.24 |      | 65825.4 | 6 (6 0 0 0 0) |
|    | 1375                                                                                                                 | R.GSSSGGGYSSGSSYGSGGR.Q    | 1740.70557 | 0.00175  | 2 | 1.13E-11 | 4.67  | 0.69 | 1783.2  | 26/38         |
|    | 1533                                                                                                                 | R.GSGGGGSISGGGYGSGGGSGGR.Y | 1741.74841 | 0.00164  | 2 | 1.48E-09 | 4.38  | 0.73 | 1038.8  | 23/44         |
|    | 2505                                                                                                                 | R.GFSSGSAAVSSGSR.R         | 1254.60730 | 0.00115  | 2 | 1.52E-05 | 4.15  | 0.59 | 2187.2  | 22/26         |
|    | 1938                                                                                                                 | R.SKEEAEALYHSK.Y           | 1391.68018 | 0.00027  | 3 | 4.29E-06 | 3.34  | 0.42 | 1001.0  | 22/44         |
|    | 1519                                                                                                                 | R.YGSGGGSKGGSISGGYGSGGGK.H | 1890.85767 | -0.01102 | 3 | 2.55E-04 | 3.24  | 0.41 | 977.2   | 30/88         |

|    |                                                                                                                  |                                     |            |          |   |          |       |      |          |               |
|----|------------------------------------------------------------------------------------------------------------------|-------------------------------------|------------|----------|---|----------|-------|------|----------|---------------|
|    | 3019                                                                                                             | R.YLDGLTAER.T                       | 1037.52625 | 0.00090  | 2 | 7.55E-02 | 2.17  | 0.14 | 632.5    | 13/16         |
| 24 | psu PF14_0359   organism=Plasmodium_falciparum_3D7   product=hypothetical protein, conserved   location=MAL14:   |                                     |            |          |   | 7.21E-08 | 60.24 |      | 48438.4  | 6 (6 0 0 0 0) |
|    | 2470                                                                                                             | K.QQQQQQEQAYDDEDHQPEMEGGR.V         | 2774.13428 | 0.00436  | 3 | 8.30E-07 | 4.71  | 0.62 | 416.0    | 23/88         |
|    | 5022                                                                                                             | R.KLYDEYGEEGLENGEQPADATDLDFILNAGK.G | 3561.65430 | 0.00380  | 4 | 1.81E-06 | 4.48  | 0.52 | 1076.0   | 37/186        |
|    | 3577                                                                                                             | K.VTLEQLYNGATK.K                    | 1336.71069 | 0.00408  | 2 | 7.21E-08 | 3.93  | 0.53 | 1434.1   | 19/22         |
|    | 2443                                                                                                             | K.KRGEDIVSEVK.V                     | 1259.69543 | -0.00051 | 3 | 8.92E-05 | 3.02  | 0.25 | 1250.5   | 22/40         |
|    | 3114                                                                                                             | R.EVLDEGMPTYK.D                     | 1281.60315 | -0.00130 | 2 | 2.30E-04 | 2.59  | 0.39 | 355.2    | 11/20         |
|    | 3290                                                                                                             | R.KIIEVYIPK.G                       | 1102.68701 | -0.00483 | 2 | 1.13E-02 | 2.16  | 0.34 | 594.8    | 12/16         |
| 25 | psu PF14_0567   organism=Plasmodium_falciparum_3D7   product=hypothetical protein   location=MAL14:2433297-24    |                                     |            |          |   | 8.38E-06 | 60.22 |      | 40043.0  | 6 (6 0 0 0 0) |
|    | 4182 - 4184                                                                                                      | K.YFNISPLIIDNK.R                    | 1436.77844 | 0.00072  | 2 | 4.39E-03 | 4.30  | 0.45 | 1056.6   | 18/22         |
|    | 2599 - 2601                                                                                                      | K.NTSIHPVINASR.S                    | 1308.70190 | 0.01348  | 2 | 8.38E-06 | 3.25  | 0.40 | 721.5    | 18/22         |
|    | 2317                                                                                                             | K.YIDVSNTEK.L                       | 1068.52075 | -0.00154 | 2 | 1.01E-03 | 2.57  | 0.26 | 743.6    | 14/16         |
|    | 1450                                                                                                             | K.EKEDDHSSSNVTNEVK.K                | 1817.81482 | -0.00389 | 4 | 1.63E-02 | 2.54  | 0.13 | 587.3    | 27/90         |
|    | 1567                                                                                                             | K.EDDHSSSNVTNEVK.K                  | 1560.67725 | -0.00179 | 2 | 4.48E-04 | 2.31  | 0.34 | 293.4    | 16/26         |
|    | 2562                                                                                                             | K.LSEPPQIK.Y                        | 911.51965  | 0.02111  | 2 | 6.22E-02 | 2.21  | 0.16 | 461.3    | 11/14         |
| 26 | psu PF14_0593   organism=Plasmodium_falciparum_3D7   product=hypothetical protein   location=MAL14:2524856-25    |                                     |            |          |   | 2.13E-13 | 50.24 |      | 161116.5 | 5 (5 0 0 0 0) |
|    | 1891                                                                                                             | K.NDTNNQTNLNSNKDETSQVQVNR.F         | 2766.21582 | 0.00425  | 3 | 2.13E-13 | 4.55  | 0.49 | 1230.6   | 31/96         |
|    | 1625                                                                                                             | K.KNDTNNQTNLNSNKDETSQVQVNR.F        | 2894.31079 | -0.00523 | 4 | 3.44E-05 | 4.15  | 0.45 | 1497.1   | 43/150        |
|    | 4110                                                                                                             | R.IDKPIAIVSVLGMHTGK.S               | 1894.04663 | -0.00169 | 4 | 6.61E-03 | 3.81  | 0.48 | 1372.1   | 41/102        |
|    | 4654                                                                                                             | K.SYEYEKDEYNEEIIDLLNLYK.T           | 2683.26611 | -0.00143 | 3 | 2.28E-02 | 2.83  | 0.12 | 404.7    | 20/80         |
|    | 3851                                                                                                             | K.LPPLLNEIK.K                       | 1036.64014 | -0.00020 | 2 | 2.67E-03 | 2.14  | 0.30 | 441.8    | 14/16         |
| 27 | gij 27574029 pdb 1N11 A Chain A, D34 Region Of Human Ankyrin-R And Linker [MASS=4                                |                                     |            |          |   | 1.39E-08 | 50.24 |      | 46366.4  | 5 (5 0 0 0 0) |
|    | 3155                                                                                                             | K.NGASPNEVSSDGTPLAIK.R              | 1928.95593 | 0.00164  | 2 | 1.39E-08 | 4.77  | 0.61 | 1080.6   | 23/38         |
|    | 3607                                                                                                             | K.LLLENANPNLATTAGHTPLHIAAR.E        | 2622.41113 | 0.01357  | 4 | 2.30E-05 | 4.68  | 0.45 | 2360.8   | 48/144        |
|    | 4198                                                                                                             | R.EGHVETVLALLEK.E                   | 1437.79480 | 0.00022  | 3 | 1.51E-03 | 4.23  | 0.24 | 1110.5   | 26/48         |
|    | 2237                                                                                                             | K.HGVMVDATTR.M                      | 1086.53601 | 0.01128  | 2 | 1.88E-06 | 3.06  | 0.54 | 1570.7   | 17/18         |
|    | 4051                                                                                                             | R.LGYISVTDVLK.V                     | 1207.69324 | -0.00203 | 2 | 1.27E-04 | 2.87  | 0.19 | 682.7    | 15/20         |
| 28 | gij 1360744 pir B35049 ankyrin 1, erythrocyte splice form 3 - human [MASS=203445                                 |                                     |            |          |   | 1.45E-09 | 50.21 |      | 203319.9 | 5 (5 0 0 0 0) |
|    | 3434                                                                                                             | R.ISEILLDHGAPIQAK.T                 | 1604.90063 | 0.00323  | 2 | 1.45E-09 | 3.76  | 0.54 | 1704.0   | 21/28         |
|    | 3529                                                                                                             | R.TAAVLLQNDPNPDVLSK.T               | 1794.95959 | 0.00567  | 2 | 1.44E-04 | 3.31  | 0.61 | 650.6    | 18/32         |
|    | 2803                                                                                                             | R.ELVNYGANVNAQSQK.G                 | 1634.81323 | -0.00056 | 2 | 1.50E-07 | 3.27  | 0.52 | 1278.9   | 19/28         |
|    | 3154                                                                                                             | R.EADAATSFLR.A                      | 1080.53198 | -0.00093 | 2 | 6.14E-05 | 3.10  | 0.32 | 978.8    | 17/18         |
|    | 3238                                                                                                             | K.MVVPELLHK.E                       | 968.55975  | -0.00080 | 2 | 1.07E-01 | 2.22  | 0.45 | 508.0    | 12/14         |
| 29 | gij 4507021 ref NP_000333.1  solute carrier family 4, anion exchanger, member 1 [Homo sapiens]                   |                                     |            |          |   | 9.14E-06 | 50.21 |      | 101727.8 | 5 (5 0 0 0 0) |
|    | 2671 - 2673                                                                                                      | K.ASTPGAAAQIQEVK.E                  | 1370.72742 | 0.00157  | 2 | 3.82E-03 | 4.14  | 0.48 | 754.1    | 19/26         |
|    | 2787                                                                                                             | R.SVTHANALTVMGK.A                   | 1328.69910 | -0.00020 | 2 | 9.14E-06 | 3.86  | 0.53 | 1696.9   | 20/24         |
|    | 3799                                                                                                             | R.GWVIHPLGLR.S                      | 1147.67346 | 0.00054  | 2 | 8.25E-03 | 2.75  | 0.35 | 1268.4   | 15/18         |
|    | 2566                                                                                                             | K.IFQDHPQLK.T                       | 1125.60510 | 0.02459  | 2 | 6.66E-03 | 2.49  | 0.23 | 375.6    | 12/16         |
|    | 4538 - 4540                                                                                                      | R.VLLPLIFR.N                        | 970.64478  | -0.00093 | 2 | 4.73E-04 | 2.05  | 0.41 | 560.0    | 11/14         |
| 30 | psu PFB0100c   organism=Plasmodium_falciparum_3D7   product=knob associated histidine-rich protein   location=MA |                                     |            |          |   | 1.26E-08 | 40.29 |      | 71259.4  | 4 (4 0 0 0 0) |
|    | 1650                                                                                                             | K.GASTTAGSTTGATTGANAVQSK.D          | 1938.93628 | 0.00615  | 2 | 1.26E-08 | 5.24  | 0.66 | 1234.5   | 24/42         |
|    | 3678                                                                                                             | R.FPLGMNDEDEEGKEALAIK.D             | 2106.00586 | 0.00986  | 3 | 3.54E-07 | 5.04  | 0.51 | 1759.3   | 37/72         |



|    |                                                                                                                    |                                |            |          |   |          |          |       |          |               |
|----|--------------------------------------------------------------------------------------------------------------------|--------------------------------|------------|----------|---|----------|----------|-------|----------|---------------|
|    | 3215                                                                                                               | R.FPLGMNDEDEEGK.E              | 1480.62610 | 0.00102  | 2 | 7.76E-08 | 4.11     | 0.64  | 1700.1   | 21/24         |
|    | 1558                                                                                                               | K.NAANNGEQVMSR.G               | 1290.58557 | -0.00154 | 2 | 5.31E-05 | 3.69     | 0.59  | 1525.1   | 18/22         |
| 31 | psu PFC0110w   organism=Plasmodium_falciparum_3D7   product=Cytoadherence linked asexual protein 3.1   location=   |                                |            |          |   | 1.28E-08 | 40.27    |       | 167381.1 | 4 (4 0 0 0 0) |
|    | 2401                                                                                                               | K.NENANVNTPENLNK.L             | 1570.74561 | 0.00065  | 2 | 4.12E-06 | 5.31     | 0.46  | 1589.4   | 21/26         |
|    | 3473                                                                                                               | K.LLNEYDNIEQLK.S               | 1491.76892 | 0.00261  | 2 | 4.88E-05 | 4.46     | 0.36  | 1353.2   | 17/22         |
|    | 3898                                                                                                               | K.TIVTNYWYPSPIK.K              | 1581.83118 | 0.00090  | 2 | 1.10E-05 | 3.42     | 0.52  | 750.6    | 16/24         |
|    | 3271                                                                                                               | K.ESSPIGDHGTFFR.K              | 1449.67566 | 0.00200  | 2 | 1.28E-08 | 2.59     | 0.58  | 303.8    | 16/24         |
| 32 | gij 155969697 ref NP_775109.2  keratin 6C [Homo sapiens]                                                           |                                |            |          |   |          | 2.92E-11 | 40.25 | 59988.4  | 4 (4 0 0 0 0) |
|    | 5101                                                                                                               | R.NLDLDSIIAEVKAQYEEIAQR.S      | 2418.25098 | 0.00395  | 2 | 2.92E-11 | 5.04     | 0.58  | 1987.5   | 26/40         |
|    | 5039                                                                                                               | R.NLDLDSIIAEVKAQYEEIAQRSR.A    | 2661.38428 | -0.00143 | 3 | 1.99E-02 | 3.47     | 0.11  | 314.0    | 21/88         |
|    | 3107                                                                                                               | R.AIGGGLSSVGGGSSTIKYTTTSSSSR.K | 2418.21069 | 0.00169  | 3 | 1.28E-05 | 3.44     | 0.51  | 1031.1   | 33/100        |
|    | 2850                                                                                                               | R.RGFSANSARLPGVSR.S            | 1574.85095 | -0.00460 | 3 | 4.84E-04 | 3.26     | 0.41  | 839.8    | 25/56         |
| 33 | psu PFI0165c   organism=Plasmodium_falciparum_3D7   product=DEAD/DEAH box helicase, putative   location=MAL9       |                                |            |          |   | 4.05E-08 | 40.25    |       | 300733.3 | 4 (4 0 0 0 0) |
|    | 5106                                                                                                               | K.ELEDMTINLINELMK.R            | 1805.90234 | 0.00225  | 2 | 7.76E-07 | 4.93     | 0.56  | 1718.2   | 22/28         |
|    | 4522                                                                                                               | R.LVDVYNFNITNLIK.S             | 1779.96399 | 0.00298  | 2 | 4.05E-08 | 4.29     | 0.55  | 2028.6   | 22/28         |
|    | 1511                                                                                                               | K.INDNNNNINCDNTK.N             | 1719.73511 | -0.00069 | 2 | 2.33E-07 | 3.51     | 0.61  | 697.7    | 17/28         |
|    | 4405                                                                                                               | R.SPFLVSLFK.G                  | 1037.60303 | 0.00334  | 2 | 7.22E-04 | 3.12     | 0.49  | 986.9    | 14/16         |
| 34 | psu PF14_0301   organism=Plasmodium_falciparum_3D7   product=hypothetical protein   location=MAL14:1260850-12      |                                |            |          |   | 1.23E-06 | 40.23    |       | 33245.8  | 4 (4 0 0 0 0) |
|    | 4067 - 4069                                                                                                        | K.FDNSGISLLDIK.Y               | 1321.69983 | 0.00066  | 2 | 3.46E-04 | 4.23     | 0.34  | 1664.7   | 19/22         |
|    | 4442                                                                                                               | K.SINDNAISVEVIQNI MEK.K        | 2017.02698 | 0.00334  | 2 | 1.23E-06 | 3.80     | 0.61  | 895.8    | 20/34         |
|    | 3614                                                                                                               | K.LLNKPSLDLLK.N                | 1253.78271 | 0.00376  | 3 | 3.36E-03 | 2.64     | 0.20  | 434.0    | 23/40         |
|    | 2775                                                                                                               | K.FELEHSSISK.H                 | 1176.58948 | -0.00276 | 2 | 5.94E-03 | 2.09     | 0.40  | 926.4    | 14/18         |
| 35 | gij 4504301 ref NP_003529.1  histone cluster 1, H4a [Homo sapiens]                                                 |                                |            |          |   |          | 1.09E-04 | 40.22 | 11360.4  | 4 (4 0 0 0 0) |
|    | 3149                                                                                                               | R.ISGLIYEETR.G                 | 1180.62085 | -0.00252 | 2 | 1.09E-04 | 4.32     | 0.49  | 1197.2   | 17/18         |
|    | 2878                                                                                                               | R.DNIQGITKPAIR.R               | 1325.75354 | 0.01848  | 2 | 2.38E-04 | 3.33     | 0.24  | 1080.0   | 18/22         |
|    | 3665                                                                                                               | K.VFLENVIR.D                   | 989.57782  | 0.00047  | 2 | 4.99E-03 | 2.74     | 0.29  | 570.6    | 13/14         |
|    | 1781                                                                                                               | R.DAVTYTEHAK.R                 | 1134.54260 | -0.00117 | 2 | 5.40E-03 | 2.30     | 0.52  | 387.8    | 11/18         |
| 36 | psu PFI0605c   organism=Plasmodium_falciparum_3D7   product=hypothetical protein, conserved   location=MAL9:551    |                                |            |          |   | 2.56E-07 | 40.19    |       | 52671.4  | 4 (4 0 0 0 0) |
|    | 3297                                                                                                               | K.VNNNLLNSIEK.R                | 1257.67969 | -0.00215 | 2 | 1.70E-04 | 3.14     | 0.32  | 867.1    | 15/20         |
|    | 3327                                                                                                               | K.FKIDGIYDDHDY NK.N            | 1742.80200 | -0.00454 | 3 | 3.51E-04 | 3.09     | 0.38  | 815.4    | 25/52         |
|    | 2746                                                                                                               | K.IDGIYDDHDY NK.N              | 1467.63867 | 0.00090  | 2 | 2.56E-07 | 2.81     | 0.43  | 1028.5   | 18/22         |
|    | 2765                                                                                                               | K.LYIDPDNEK.N                  | 1106.53638 | -0.00289 | 2 | 2.13E-02 | 2.01     | 0.15  | 909.2    | 13/16         |
| 37 | psu PFE0080c   organism=Plasmodium_falciparum_3D7   product=rhoptry-associated protein 2, RAP2   location=MAL5     |                                |            |          |   | 1.27E-06 | 40.19    |       | 46708.8  | 4 (4 0 0 0 0) |
|    | 4272                                                                                                               | K.FMENLDLYIMK.E                | 1416.69019 | 0.00346  | 2 | 1.50E-05 | 3.71     | 0.50  | 1349.7   | 17/20         |
|    | 3991                                                                                                               | K.SMLSTDDYQSFFK.N              | 1568.69373 | 0.00200  | 2 | 1.27E-06 | 3.03     | 0.57  | 793.1    | 18/24         |
|    | 3301                                                                                                               | K.SNPYFIVGSR.V                 | 1139.58435 | -0.02693 | 2 | 5.22E-05 | 2.61     | 0.57  | 592.6    | 14/18         |
|    | 3875 - 3877                                                                                                        | K.YTEISVLNYVR.D                | 1356.71582 | -0.00038 | 2 | 8.01E-06 | 2.53     | 0.59  | 535.0    | 16/20         |
| 38 | psu PFB0895c   organism=Plasmodium_falciparum_3D7   product=replication factor C subunit 1, putative   location=MA |                                |            |          |   | 1.03E-06 | 40.18    |       | 104119.9 | 4 (4 0 0 0 0) |
|    | 2689                                                                                                               | R.LPNQENLYDK.L                 | 1233.61096 | -0.00337 | 2 | 7.65E-05 | 3.58     | 0.39  | 777.8    | 16/18         |
|    | 2354                                                                                                               | K.LLPQTDQTDQENDK.T             | 1529.74414 | 0.00066  | 2 | 1.03E-06 | 3.01     | 0.53  | 394.8    | 20/24         |
|    | 2571                                                                                                               | K.AFELQQQNK.S                  | 1105.56360 | 0.02165  | 2 | 4.83E-03 | 2.91     | 0.32  | 1149.8   | 13/16         |
|    | 4884                                                                                                               | K.WNVFSQIAHDL SLADK.I          | 1843.93372 | -0.00162 | 3 | 8.19E-04 | 2.70     | 0.41  | 462.0    | 21/60         |

|    |                                                                                                                   |                               |            |          |          |          |      |      |          |               |
|----|-------------------------------------------------------------------------------------------------------------------|-------------------------------|------------|----------|----------|----------|------|------|----------|---------------|
| 39 | psu MAL7P1.5   organism=Plasmodium_falciparum_3D7   product=Plasmodium falciparum Maurer's Cleft 2 transmemt      |                               |            |          | 4.07E-07 | 30.27    |      |      | 27539.4  | 3 (3 0 0 0 0) |
|    | 4754 - 4756                                                                                                       | K.NPDDQISDLVSLVDNMNITQEK.K    | 2488.18726 | 0.00299  | 3        | 1.19E-05 | 5.49 | 0.52 | 1378.6   | 34/84         |
|    | 4542                                                                                                              | K.KKNPDDQISDLVSLVDNMNITQEK.K  | 2744.37720 | 0.00369  | 3        | 1.91E-06 | 4.84 | 0.25 | 1406.8   | 31/92         |
|    | 4656                                                                                                              | K.KNPDDQISDLVSLVDNMNITQEK.K   | 2616.28223 | 0.00284  | 3        | 4.07E-07 | 4.48 | 0.15 | 1291.6   | 32/88         |
| 40 | psu PF14_0445   organism=Plasmodium_falciparum_3D7   product=hypothetical protein   location=MAL14:1920913-19     |                               |            |          | 8.73E-07 | 30.25    |      |      | 20330.7  | 3 (3 0 0 0 0) |
|    | 4732 - 4734                                                                                                       | K.FNDIFLFIEDTTK.N             | 1602.80505 | 0.00188  | 2        | 8.73E-07 | 5.09 | 0.55 | 1939.1   | 21/24         |
|    | 2171                                                                                                              | K.NLNYPYNNNDEEK.Q             | 1463.63977 | -0.00264 | 2        | 9.25E-04 | 2.59 | 0.33 | 446.5    | 15/22         |
|    | 3927                                                                                                              | R.NSTNDLFSSFYEK.F             | 1551.69617 | 0.00310  | 2        | 1.19E-06 | 2.00 | 0.46 | 252.3    | 11/24         |
| 41 | psu PFD0090c   organism=Plasmodium_falciparum_3D7   product=hypothetical protein, conserved in P.falciparum   loc |                               |            |          | 1.31E-05 | 30.25    |      |      | 49712.6  | 3 (3 0 0 0 0) |
|    | 3615 - 3617                                                                                                       | R.FGSYEQVLISQPHEFNER.L        | 2180.04077 | 0.00870  | 3        | 1.31E-05 | 4.92 | 0.49 | 1826.2   | 32/68         |
|    | 1659                                                                                                              | K.KLSQDYNDVNK.K               | 1323.65393 | -0.00374 | 2        | 3.86E-02 | 2.95 | 0.32 | 1032.6   | 14/20         |
|    | 1485                                                                                                              | K.LSQDYNDVNKK.F               | 1323.65393 | 0.00017  | 2        | 1.73E-02 | 2.86 | 0.30 | 1186.3   | 16/20         |
| 42 | psu PF14_0159   organism=Plasmodium_falciparum_3D7   product=hypothetical protein, conserved   location=MAL14:1   |                               |            |          | 2.02E-06 | 30.24    |      |      | 110641.7 | 3 (3 0 0 0 0) |
|    | 4657                                                                                                              | R.DWFEEFAPIEVVR.N             | 1636.80054 | 0.00066  | 2        | 2.02E-06 | 4.74 | 0.62 | 1581.2   | 20/24         |
|    | 2050                                                                                                              | R.DAQYIQTGSK.M                | 1239.58521 | 0.00016  | 2        | 4.89E-05 | 2.88 | 0.50 | 1056.0   | 15/20         |
|    | 2141                                                                                                              | K.STINEDINNK.L                | 1147.55896 | 0.01384  | 2        | 1.61E-03 | 2.35 | 0.38 | 794.4    | 15/18         |
| 43 | psu PFA0065w   organism=Plasmodium_falciparum_3D7   product=Plasmodium falciparum Maurer's Cleft 2 transmemt      |                               |            |          | 1.44E-05 | 30.24    |      |      | 27542.6  | 3 (3 0 0 0 0) |
|    | 4666                                                                                                              | K.KNPDAEISDLVNLVDNMNITQEK.K   | 2600.28711 | 0.00063  | 4        | 1.44E-05 | 4.10 | 0.53 | 2250.5   | 42/132        |
|    | 4799                                                                                                              | K.NPDAEISDLVNLVDNMNITQEK.K    | 2472.19214 | 0.00229  | 3        | 8.68E-04 | 3.78 | 0.44 | 1174.1   | 30/84         |
|    | 4514                                                                                                              | K.KKNPDAEISDLVNLVDNMNITQEK.K  | 2728.38208 | -0.00083 | 4        | 9.69E-05 | 3.75 | 0.31 | 1304.0   | 36/138        |
| 44 | psu PF14_0538   organism=Plasmodium_falciparum_3D7   product=hypothetical protein   location=MAL14:2314316-23     |                               |            |          | 2.79E-08 | 30.23    |      |      | 283024.1 | 3 (3 0 0 0 0) |
|    | 4566                                                                                                              | R.NLIISQLIDNINEDR.K           | 1769.93921 | 0.00115  | 2        | 2.41E-06 | 4.63 | 0.52 | 2047.1   | 21/28         |
|    | 3195                                                                                                              | K.NNSNNSTLDIINDDR.S           | 1704.77832 | 0.00078  | 2        | 2.79E-08 | 4.36 | 0.54 | 1653.0   | 20/28         |
|    | 3131 - 3133                                                                                                       | K.HNYFDVEHNDTNSIVK.Y          | 2060.93091 | -0.00189 | 3        | 4.15E-06 | 4.15 | 0.50 | 1810.4   | 31/64         |
| 45 | gij 24430192 ref NP_005548.2  keratin 16 [Homo sapiens]                                                           |                               |            |          | 3.76E-05 | 30.22    |      |      | 51236.3  | 3 (3 0 0 0 0) |
|    | 2962                                                                                                              | K.TEELNKEVASNSSELVQSSR.S      | 2120.04663 | -0.00174 | 3        | 3.76E-05 | 4.50 | 0.50 | 1978.2   | 32/72         |
|    | 2638                                                                                                              | R.QTRPILKEQSSSFSQSQSS.-       | 2182.07349 | 0.00845  | 3        | 8.34E-04 | 3.83 | 0.49 | 1089.2   | 29/76         |
|    | 1833                                                                                                              | R.EVFTSSSSSSSR.Q              | 1260.57019 | -0.00203 | 2        | 1.65E-04 | 3.37 | 0.48 | 1206.8   | 18/22         |
| 46 | psu PFE1005w   organism=Plasmodium_falciparum_3D7   product=40S ribosomal subunit protein S9, putative   locatio  |                               |            |          | 3.83E-04 | 30.22    |      |      | 22109.3  | 3 (3 0 0 0 0) |
|    | 4624                                                                                                              | R.QGLLGENEEKLDYVLGLTLPK.L     | 2329.26489 | 0.00181  | 3        | 2.37E-03 | 4.34 | 0.40 | 1062.1   | 29/80         |
|    | 3425                                                                                                              | R.IFQGEALLR.R                 | 1046.59937 | -0.00191 | 2        | 1.38E-02 | 2.33 | 0.27 | 541.1    | 12/16         |
|    | 2583                                                                                                              | R.QGLLGENEEK.L                | 1116.55310 | 0.01628  | 2        | 3.83E-04 | 2.25 | 0.26 | 287.2    | 13/18         |
| 47 | psu MAL13P1.61   organism=Plasmodium_falciparum_3D7   product=hypothetical protein, conserved in P. falciparum    |                               |            |          | 2.90E-06 | 30.21    |      |      | 28236.9  | 3 (3 0 0 0 0) |
|    | 2983 - 2985                                                                                                       | K.VETEQSTPAKPEPTEFVNNDIHQNK.N | 2852.36963 | 0.00258  | 4        | 2.90E-06 | 4.28 | 0.47 | 630.0    | 43/144        |
|    | 1446                                                                                                              | R.KNEITNHYSER.I               | 1390.67102 | -0.00387 | 3        | 2.10E-04 | 2.66 | 0.31 | 346.5    | 17/40         |
|    | 1679                                                                                                              | K.NEITNHYSER.I                | 1262.57605 | 0.00090  | 2        | 6.05E-06 | 2.39 | 0.23 | 523.0    | 12/18         |
| 48 | psu PF14_0455   organism=Plasmodium_falciparum_3D7   product=multidrug resistance protein 2 (heavy metal transp   |                               |            |          | 2.00E-05 | 30.21    |      |      | 118936.9 | 3 (3 0 0 0 0) |
|    | 1415                                                                                                              | K.IYDNNNNNNNNNINSK.I          | 1878.83252 | -0.00581 | 2        | 2.00E-05 | 3.81 | 0.36 | 651.0    | 18/30         |
|    | 4500                                                                                                              | R.NIIGIVPQDTILFNESIK.Y        | 2014.12195 | 0.00468  | 2        | 5.42E-04 | 2.82 | 0.39 | 300.2    | 15/34         |
|    | 1531                                                                                                              | K.SNEPHTETNSSIDKDDVNK.N       | 2129.95825 | -0.00369 | 3        | 1.82E-02 | 2.79 | 0.42 | 422.5    | 23/72         |
| 49 | psu MAL13P1.171   organism=Plasmodium_falciparum_3D7   product=transmembrane protein Tmp21 homologue, puta        |                               |            |          | 3.16E-05 | 30.21    |      |      | 24979.3  | 3 (3 0 0 0 0) |
|    | 2930                                                                                                              | K.TEHLNQGTLYLK.Q              | 1416.74817 | -0.00032 | 2        | 3.16E-05 | 3.94 | 0.48 | 1206.7   | 18/22         |

|    |                            |                                                                    |                                                      |                       |   |          |       |      |          |               |
|----|----------------------------|--------------------------------------------------------------------|------------------------------------------------------|-----------------------|---|----------|-------|------|----------|---------------|
|    | 4367 - 4372                | K.QILDQMNIFHVNLK.R                                                 | 1712.91528                                           | 0.00349               | 3 | 4.89E-04 | 3.61  | 0.30 | 937.2    | 23/52         |
|    | 3477                       | K.LPIFETVVK.H                                                      | 1060.60376                                           | -0.00032              | 2 | 3.59E-03 | 2.83  | 0.38 | 844.2    | 14/16         |
| 50 | gj 4503595 ref NP_000493.1 | eosinophil peroxidase [Homo sapiens]                               |                                                      |                       |   | 7.92E-05 | 30.20 |      | 80989.3  | 3 (3 0 0 0 0) |
|    | 3697                       | R.IVYEGGIDPILR.G                                                   | 1344.75220                                           | 0.00273               | 2 | 7.92E-05 | 3.57  | 0.54 | 1276.3   | 16/22         |
|    | 2773                       | R.RPLLGASNQALAR.W                                                  | 1366.79138                                           | 0.03388               | 3 | 4.11E-04 | 3.45  | 0.39 | 1542.8   | 27/48         |
|    | 4251                       | R.NGFLLPLVR.A                                                      | 1028.62512                                           | 0.00042               | 2 | 6.96E-03 | 3.17  | 0.37 | 890.7    | 14/16         |
| 51 | psu PFE1465w               | organism=Plasmodium_falciparum_3D7                                 | product=hypothetical protein, conserved              | location=MAL5:11      |   | 8.06E-11 | 30.19 |      | 191498.5 | 3 (3 0 0 0 0) |
|    | 5137                       | K.FDPSNMTILNLIEDIK.W                                               | 1862.95679                                           | 0.00139               | 2 | 8.06E-11 | 3.77  | 0.56 | 1369.4   | 24/30         |
|    | 4122                       | R.VGLLDYLNK.V                                                      | 1034.58801                                           | -0.00141              | 2 | 9.62E-05 | 2.72  | 0.15 | 1027.8   | 14/16         |
|    | 1502                       | K.VTDENDAIDTQNKNEHND.-                                             | 2071.87988                                           | -0.00436              | 3 | 5.78E-03 | 2.55  | 0.39 | 238.5    | 19/68         |
| 52 | psu MAL8P1.98              | organism=Plasmodium_falciparum_3D7                                 | product=serine protease, putative                    | location=MAL8:616354- |   | 2.07E-06 | 30.19 |      | 42818.5  | 3 (3 0 0 0 0) |
|    | 4567                       | K.VDDLIFLGSGFIYNK.N                                                | 1700.88940                                           | -0.00080              | 2 | 2.99E-06 | 3.83  | 0.52 | 1896.2   | 21/28         |
|    | 3187                       | K.QGEVVIAYGQIQK.F                                                  | 1432.77942                                           | 0.00285               | 2 | 2.07E-06 | 3.54  | 0.46 | 1576.6   | 19/24         |
|    | 3554                       | K.NIALLLQNK.G                                                      | 1026.63062                                           | 0.00480               | 2 | 1.28E-02 | 2.55  | 0.30 | 442.2    | 13/16         |
| 53 | psu PF10_0366              | organism=Plasmodium_falciparum_3D7                                 | product=ADP/ATP transporter on adenylate translocase | location=MAL10:11     |   | 1.43E-04 | 30.18 |      | 33704.7  | 3 (3 0 0 0 0) |
|    | 3622                       | K.MLIQTQDSIPEIK.S                                                  | 1515.80872                                           | 0.00639               | 2 | 1.43E-04 | 3.55  | 0.43 | 1293.2   | 20/24         |
|    | 1787                       | R.YDQNTDFSK.F                                                      | 1117.47961                                           | -0.00166              | 2 | 3.75E-03 | 2.95  | 0.44 | 904.4    | 14/16         |
|    | 3905                       | K.EQGVLSLWR.G                                                      | 1087.58948                                           | -0.00118              | 2 | 2.77E-02 | 2.07  | 0.21 | 343.8    | 9/16          |
| 54 | psu PFD1015w               | organism=Plasmodium_falciparum_3D7                                 | product=hypothetical protein, conserved              | location=MAL4:10      |   | 4.79E-07 | 30.17 |      | 44902.0  | 3 (3 0 0 0 0) |
|    | 3015 - 3017                | R.GDINMDQFNEK.K                                                    | 1310.56812                                           | -0.00093              | 2 | 3.26E-05 | 3.33  | 0.43 | 911.4    | 14/20         |
|    | 3710                       | K.LTTVALGLGENPSLR.S                                                | 1540.86938                                           | 0.00262               | 2 | 4.79E-07 | 3.23  | 0.49 | 1160.2   | 20/28         |
|    | 3174                       | K.DFTNYIQR.I                                                       | 1056.51086                                           | 0.03033               | 2 | 2.27E-02 | 2.62  | 0.37 | 406.8    | 10/14         |
| 55 | psu PFL1925w               | organism=Plasmodium_falciparum_3D7                                 | product=cell division protein FtsH, putative         | location=MAL12:11     |   | 7.92E-04 | 30.17 |      | 100894.9 | 3 (3 0 0 0 0) |
|    | 4879 - 4883                | K.LELLEVDFIK.N                                                     | 1317.76648                                           | -0.00007              | 2 | 7.92E-04 | 3.34  | 0.43 | 1425.3   | 16/20         |
|    | 5044                       | R.FEEIAGIDESKLELLEVDFIK.N                                          | 2536.34326                                           | 0.00419               | 3 | 2.34E-02 | 2.59  | 0.42 | 686.0    | 25/84         |
|    | 1925                       | K.DNFNNTNYR.T                                                      | 1157.49707                                           | -0.00276              | 2 | 2.91E-03 | 2.59  | 0.39 | 694.3    | 14/16         |
| 56 | gj 88180 pir               | C28894 myeloperoxidase (EC 1.11.1.7), splice form H14 - human [MAS |                                                      |                       |   | 3.17E-05 | 30.17 |      | 92378.3  | 3 (3 0 0 0 0) |
|    | 4175                       | R.IGLDLPALNMQR.S                                                   | 1340.73547                                           | 0.00091               | 2 | 3.17E-05 | 3.33  | 0.33 | 553.1    | 16/22         |
|    | 3139                       | R.DHGLPGYNAWR.R                                                    | 1285.60730                                           | 0.00102               | 2 | 1.47E-02 | 2.63  | 0.42 | 480.4    | 15/20         |
|    | 2870                       | R.QNQIIVDEIR.E                                                     | 1185.62219                                           | -0.00264              | 2 | 4.91E-03 | 2.35  | 0.40 | 297.5    | 12/18         |
| 57 | psu PF07_0129              | organism=Plasmodium_falciparum_3D7                                 | product=acyl-coA synthetase, PfACS5                  | location=MAL7:142     |   | 4.08E-05 | 30.17 |      | 93224.9  | 3 (3 0 0 0 0) |
|    | 4093                       | K.SGSIFSGYFLEK.E                                                   | 1334.66272                                           | 0.00102               | 2 | 4.63E-05 | 3.31  | 0.50 | 1059.3   | 18/22         |
|    | 1954                       | K.TGITEDNYNDR.L                                                    | 1297.56555                                           | -0.00166              | 2 | 4.08E-05 | 2.79  | 0.51 | 900.0    | 16/20         |
|    | 1871 - 1873                | K.MMETYNSTK.L                                                      | 1104.46997                                           | 0.00096               | 2 | 2.35E-04 | 2.11  | 0.47 | 394.7    | 11/16         |
| 58 | gj 3387905 gb AAC28635.1   | glucose transporter glycoprotein [Homo sapiens] [MASS=             |                                                      |                       |   | 5.34E-05 | 30.16 |      | 37855.1  | 3 (3 0 0 0 0) |
|    | 4488                       | K.VTILELFR.S                                                       | 990.59827                                            | -0.00112              | 2 | 7.43E-04 | 3.27  | 0.43 | 937.3    | 13/14         |
|    | 3511                       | R.TFDEIASGFR.Q                                                     | 1142.54761                                           | -0.00130              | 2 | 5.34E-05 | 2.94  | 0.55 | 1050.8   | 15/18         |
|    | 3879                       | K.TPEELFHPLGADSQV.-                                                | 1639.79626                                           | 0.00042               | 2 | 1.60E-02 | 2.52  | 0.52 | 395.4    | 14/28         |
| 59 | psu PFA0195w               | organism=Plasmodium_falciparum_3D7                                 | product=hypothetical protein, conserved              | location=MAL1:17      |   | 1.92E-04 | 30.14 |      | 67759.6  | 3 (3 0 0 0 0) |
|    | 1838                       | K.INYDQNYNK.D                                                      | 1171.53784                                           | -0.00093              | 2 | 6.86E-04 | 2.75  | 0.41 | 608.3    | 13/16         |
|    | 1878                       | K.FMNHQINSEK.K                                                     | 1247.58374                                           | -0.00862              | 2 | 4.10E-04 | 2.69  | 0.34 | 581.8    | 15/18         |
|    | 1559                       | K.NLTNQTEEPK.N                                                     | 1173.57458                                           | -0.00080              | 2 | 1.92E-04 | 2.16  | 0.25 | 826.1    | 14/18         |

|    |                                                                                                                  |                               |            |          |   |          |       |      |  |          |               |
|----|------------------------------------------------------------------------------------------------------------------|-------------------------------|------------|----------|---|----------|-------|------|--|----------|---------------|
| 60 | psu PFC1080c   organism=Plasmodium_falciparum_3D7   product=Plasmodium falciparum Maurer's Cleft 2 transmemt     |                               |            |          |   | 2.53E-05 | 28.20 |      |  | 26987.2  | 3 (2 1 0 0 0) |
|    | 4617                                                                                                             | K.KNPDDQISSLVSLVDNMNITQEK.K   | 2588.28711 | 0.00077  | 3 | 1.85E-02 | 4.01  | 0.25 |  | 659.2    | 25/88         |
|    | 2093                                                                                                             | K.EKNESINELQK.Y               | 1331.68018 | -0.00337 | 2 | 2.53E-05 | 2.95  | 0.37 |  | 529.6    | 16/20         |
|    | 3759                                                                                                             | K.EYMDSYLMHLR.M               | 1457.65515 | 0.00151  | 2 | 1.49E-04 | 2.62  | 0.36 |  | 390.6    | 14/20         |
| 61 | psu PF10_0130   organism=Plasmodium_falciparum_3D7   product=hypothetical protein   location=MAL10:515720-517    |                               |            |          |   | 7.47E-05 | 28.18 |      |  | 75420.2  | 3 (2 1 0 0 0) |
|    | 4507                                                                                                             | K.NNLINLLYIYK.D               | 1380.78857 | -0.00007 | 2 | 7.47E-05 | 3.35  | 0.45 |  | 1341.8   | 17/20         |
|    | 2561                                                                                                             | K.LNIQNVK.N                   | 828.49377  | 0.02056  | 2 | 1.41E-01 | 2.21  | 0.23 |  | 584.2    | 11/12         |
|    | 3797                                                                                                             | K.FAYFDLTR.N                  | 1032.51489 | 0.00017  | 2 | 5.09E-04 | 2.09  | 0.35 |  | 637.5    | 13/14         |
| 62 | psu PF10_0104   organism=Plasmodium_falciparum_3D7   product=hypothetical protein   location=MAL10:422960-424    |                               |            |          |   | 8.03E-09 | 20.29 |      |  | 25661.7  | 2 (2 0 0 0 0) |
|    | 3386                                                                                                             | K.WGTGSGNQLVTAVTNK.N          | 1733.88171 | 0.00188  | 2 | 8.03E-09 | 5.83  | 0.60 |  | 1199.5   | 20/32         |
|    | 2574                                                                                                             | K.NINQNGYLSTSK.S              | 1338.66479 | 0.02508  | 2 | 1.89E-04 | 3.69  | 0.53 |  | 1005.5   | 18/22         |
| 63 | psu PF14_0627   organism=Plasmodium_falciparum_3D7   product=ribosomal protein S3, putative   location=MAL14:2   |                               |            |          |   | 6.56E-10 | 20.29 |      |  | 24652.4  | 2 (2 0 0 0 0) |
|    | 3119                                                                                                             | R.ILAEDGYSGVEVR.V             | 1407.71143 | 0.00175  | 2 | 1.68E-07 | 4.47  | 0.59 |  | 2193.7   | 21/24         |
|    | 4771                                                                                                             | K.FINDGVFQAELNEFLAR.I         | 1982.99707 | 0.00408  | 2 | 6.56E-10 | 4.31  | 0.67 |  | 1220.2   | 22/32         |
| 64 | psu PF11_0062   organism=Plasmodium_falciparum_3D7   product=histone H2B   location=MAL11:226066-226419(+)       |                               |            |          |   | 2.55E-04 | 20.25 |      |  | 13117.1  | 2 (2 0 0 0 0) |
|    | 4641                                                                                                             | K.SMNIMNSFLVDTFEK.I           | 1775.83423 | 0.00090  | 2 | 2.55E-04 | 4.90  | 0.57 |  | 1891.1   | 21/28         |
|    | 4009                                                                                                             | R.YDSYGLYIFK.V                | 1268.61975 | -0.00105 | 2 | 1.56E-03 | 3.05  | 0.55 |  | 1010.3   | 15/18         |
| 65 | gij 9739163 gb AAF97931.1 AF274874_1 keratin 5 [Homo sapiens]                                                    |                               |            |          |   | 2.64E-08 | 20.24 |      |  | 62423.1  | 2 (2 0 0 0 0) |
|    | 5108 - 5114                                                                                                      | R.NLDLDSIIAEVKAQYEEIANR.S     | 2404.23535 | 0.00168  | 3 | 2.64E-08 | 4.88  | 0.45 |  | 1006.1   | 34/80         |
|    | 1989                                                                                                             | K.YEELQQTAGR.H                | 1194.57495 | -0.00142 | 2 | 7.21E-04 | 3.34  | 0.36 |  | 1446.6   | 16/18         |
| 66 | gij 57864582 ref NP_001009931.1  hornerin [Homo sapiens]                                                         |                               |            |          |   | 6.53E-09 | 20.24 |      |  | 28225.7  | 2 (2 0 0 0 0) |
|    | 1366                                                                                                             | R.HGSGSGHSSSYGQHSGSGWSSSSGR.H | 2477.02100 | 0.00649  | 4 | 6.53E-09 | 4.68  | 0.60 |  | 819.3    | 40/150        |
|    | 1425                                                                                                             | R.GPYESGSGHSSGLGHQESR.S       | 1928.84814 | -0.00509 | 3 | 2.42E-02 | 2.67  | 0.38 |  | 550.9    | 24/72         |
| 67 | psu PFE0050w   organism=Plasmodium_falciparum_3D7   product=hypothetical protein   location=MAL5:55841-56872(-)  |                               |            |          |   | 1.21E-06 | 20.22 |      |  | 30696.0  | 2 (2 0 0 0 0) |
|    | 3487                                                                                                             | K.DIYKPIQSYANNFSK.V           | 1787.89624 | 0.00176  | 2 | 1.21E-06 | 4.38  | 0.48 |  | 831.0    | 23/28         |
|    | 4139                                                                                                             | R.INNAFNLDILR.T               | 1302.71643 | 0.00041  | 2 | 2.95E-05 | 4.26  | 0.33 |  | 1423.3   | 18/20         |
| 68 | psu PFE0810c   organism=Plasmodium_falciparum_3D7   product=40S ribosomal subunit protein S14, putative   locati |                               |            |          |   | 4.44E-07 | 20.22 |      |  | 16066.7  | 2 (2 0 0 0 0) |
|    | 2866                                                                                                             | K.TPQPETAIVSGPQPK.E           | 1549.82202 | 0.00200  | 2 | 4.44E-07 | 4.22  | 0.60 |  | 857.9    | 20/28         |
|    | 3025                                                                                                             | R.IEDVTPIPTDSTR.K             | 1443.73254 | 0.00091  | 2 | 3.76E-06 | 3.92  | 0.57 |  | 993.9    | 19/24         |
| 69 | psu PF13_0268   organism=Plasmodium_falciparum_3D7   product=ribosomal protein L17, putative   location=MAL13:2  |                               |            |          |   | 2.48E-06 | 20.22 |      |  | 23400.0  | 2 (2 0 0 0 0) |
|    | 4457                                                                                                             | K.FLLNILDNVQANAESR.N          | 1816.95520 | -0.00094 | 3 | 2.48E-06 | 4.34  | 0.40 |  | 2530.0   | 33/60         |
|    | 2935 - 2937                                                                                                      | K.YLNDVIEK.K                  | 993.52515  | -0.00484 | 2 | 5.61E-03 | 2.29  | 0.12 |  | 454.5    | 10/14         |
| 70 | gij 7245526 pdb 1DEJA Chain A, Crystal Structure Of A DictyosteliumTETRAHYMENA CHIMERA Actin (Mutant 646: Q      |                               |            |          |   | 5.19E-08 | 20.21 |      |  | 41719.9  | 2 (2 0 0 0 0) |
|    | 3817                                                                                                             | K.SYELPDGQVITIGNER.F          | 1790.89197 | 0.00175  | 2 | 5.19E-08 | 4.29  | 0.55 |  | 1838.8   | 26/30         |
|    | 1841                                                                                                             | K.DSYVGDEAQS.K                | 1198.52222 | -0.00179 | 2 | 2.96E-05 | 2.62  | 0.11 |  | 904.8    | 16/20         |
| 71 | psu PF11_0511   organism=Plasmodium_falciparum_3D7   product=hypothetical protein   location=MAL11:1985867-19    |                               |            |          |   | 6.22E-06 | 20.21 |      |  | 22898.1  | 2 (2 0 0 0 0) |
|    | 4210                                                                                                             | R.ALAINDYIDYLK.E              | 1411.74670 | 0.00078  | 2 | 6.22E-06 | 4.28  | 0.52 |  | 1369.5   | 19/22         |
|    | 4710                                                                                                             | K.LLDLVEQYIYSNIEHEK.K         | 2106.07544 | 0.00162  | 3 | 1.82E-02 | 3.69  | 0.43 |  | 375.0    | 26/64         |
| 72 | psu MAL13P1.22   organism=Plasmodium_falciparum_3D7   product=DNA ligase 1   location=MAL13:222018-224922(-)     |                               |            |          |   | 3.53E-05 | 20.21 |      |  | 104440.1 | 2 (2 0 0 0 0) |
|    | 5071                                                                                                             | K.AGTGFSDEILSTLYETLSEK.I      | 2161.05469 | 0.00297  | 2 | 3.53E-05 | 4.27  | 0.58 |  | 592.4    | 17/38         |
|    | 2715                                                                                                             | K.TLVENASYEPSR.R              | 1365.66443 | -0.00276 | 2 | 1.90E-04 | 2.70  | 0.41 |  | 623.1    | 12/22         |
| 73 | psu PF10_0187   organism=Plasmodium_falciparum_3D7   product=ribosomal protein L30e, putative   location=MAL10   |                               |            |          |   | 1.39E-05 | 20.21 |      |  | 11767.1  | 2 (2 0 0 0 0) |

|    |               |                                                                                                                              |            |          |   |          |       |      |          |               |
|----|---------------|------------------------------------------------------------------------------------------------------------------------------|------------|----------|---|----------|-------|------|----------|---------------|
|    | 3841          | R.SVIEYYAMLSK.C                                                                                                              | 1303.66028 | -0.00252 | 2 | 1.52E-04 | 4.19  | 0.51 | 1516.3   | 17/20         |
|    | 3318          | K.LVIVSSNCPSIQR.S                                                                                                            | 1415.76746 | 0.00004  | 2 | 1.39E-05 | 3.96  | 0.58 | 1436.3   | 19/24         |
| 74 | psu PF11_0465 | organism=Plasmodium_falciparum_3D7   product=dynamine-like protein   location=MAL11:1800541-18                               |            |          |   | 4.42E-07 | 20.21 |      | 96313.0  | 2 (2 0 0 0 0) |
|    | 4493          | R.TIFNEFLDEYVVK.N                                                                                                            | 1574.77368 | 0.00127  | 2 | 4.42E-07 | 4.18  | 0.60 | 1449.6   | 19/24         |
|    | 4860          | K.SSVLESIVGMDFLPR.G                                                                                                          | 1649.85669 | 0.00237  | 2 | 3.49E-04 | 3.04  | 0.51 | 1207.0   | 19/28         |
| 75 | psu PF13_0032 | organism=Plasmodium_falciparum_3D7   product=hydrolase, putative   location=MAL13:289766-2912                                |            |          |   | 8.05E-07 | 20.20 |      | 56775.0  | 2 (2 0 0 0 0) |
|    | 3509          | K.YEEIGIPISNSTVK.G                                                                                                           | 1549.81079 | 0.00225  | 2 | 1.07E-04 | 3.04  | 0.51 | 668.3    | 19/26         |
|    | 3922          | R.YIQEALYDPNIQIMK.N                                                                                                          | 1838.93567 | 0.00078  | 2 | 8.05E-07 | 2.87  | 0.43 | 927.2    | 17/28         |
| 76 | gj 119703753  | ref NP_005546.2  keratin 6B [Homo sapiens]                                                                                   |            |          |   | 8.85E-07 | 20.20 |      | 60030.3  | 2 (2 0 0 0 0) |
|    | 2893          | R.ATGGGLSSVGGGSSTIKYTTSSSSR.K                                                                                                | 2406.17432 | 0.00034  | 3 | 1.82E-06 | 4.05  | 0.53 | 1058.9   | 34/100        |
|    | 2687          | R.ATGGGLSSVGGGSSTIK.Y                                                                                                        | 1435.73877 | -0.00227 | 2 | 8.85E-07 | 3.82  | 0.58 | 1537.7   | 25/32         |
| 77 | psu PF11_0224 | organism=Plasmodium_falciparum_3D7   product=circumsporozoite-related antigen   location=MAL11:1121928-1                     |            |          |   | 3.08E-04 | 20.20 |      | 17285.0  | 2 (2 0 0 0 0) |
|    | 2495          | K.KEEELVEVVK.R                                                                                                               | 1216.64197 | 0.00969  | 2 | 3.08E-04 | 4.04  | 0.27 | 1432.6   | 16/18         |
|    | 2323          | K.KEEELVEVVKR.K                                                                                                              | 1372.74304 | 0.00055  | 3 | 1.58E-03 | 3.83  | 0.26 | 1535.6   | 25/40         |
| 78 | psu PFE0040c  | organism=Plasmodium_falciparum_3D7   product=Mature parasite-infected erythrocyte surface antigen   location=MAL11:1121928-1 |            |          |   | 2.10E-10 | 20.20 |      | 168184.9 | 2 (2 0 0 0 0) |
|    | 4171          | K.FSEMNVVHQILNYEER.I                                                                                                         | 2007.95923 | 0.00150  | 3 | 9.13E-02 | 4.01  | 0.47 | 1311.4   | 31/60         |
|    | 2445          | K.VSGPYENSENSNVTSESEETTK.L                                                                                                   | 2415.07935 | 0.00339  | 3 | 2.10E-10 | 3.67  | 0.53 | 1180.3   | 36/84         |
| 79 | psu PF11_0301 | organism=Plasmodium_falciparum_3D7   product=spermidine synthase   location=MAL11:1121928-1                                  |            |          |   | 1.40E-07 | 20.19 |      | 36571.7  | 2 (2 0 0 0 0) |
|    | 3519          | K.NVLVVGDDGGIIR.E                                                                                                            | 1325.75354 | 0.00310  | 2 | 1.40E-07 | 3.86  | 0.52 | 2108.6   | 23/26         |
|    | 3178          | R.VNVFIEDASK.F                                                                                                               | 1121.58374 | 0.00188  | 2 | 4.53E-02 | 2.19  | 0.42 | 419.4    | 10/18         |
| 80 | psu PF11_0374 | organism=Plasmodium_falciparum_3D7   product=hypothetical protein   location=MAL11:1422741-14                                |            |          |   | 1.24E-05 | 20.19 |      | 128465.1 | 2 (2 0 0 0 0) |
|    | 2179          | K.TNEDENAESNLNPNKY                                                                                                           | 1817.77844 | -0.00166 | 2 | 1.24E-05 | 3.81  | 0.52 | 980.3    | 19/30         |
|    | 2802          | K.SNLDSSNLNEINK.N                                                                                                            | 1447.70227 | -0.00081 | 2 | 8.39E-05 | 3.54  | 0.44 | 1061.6   | 18/24         |
| 81 | gj 4557701    | ref NP_000413.1  keratin 17 [Homo sapiens]                                                                                   |            |          |   | 9.44E-06 | 20.19 |      | 48076.1  | 2 (2 0 0 0 0) |
|    | 2441          | R.EVATNSELVQSGK.S                                                                                                            | 1361.69067 | -0.00007 | 2 | 9.44E-06 | 3.77  | 0.59 | 1136.5   | 19/24         |
|    | 1894          | K.ATMQNLNDR.L                                                                                                                | 1062.49963 | -0.00007 | 2 | 1.33E-02 | 2.16  | 0.37 | 628.3    | 13/16         |
| 82 | psu PFC0730w  | organism=Plasmodium_falciparum_3D7   product=conserved protein, putative   location=MAL3:67113                               |            |          |   | 1.19E-04 | 20.19 |      | 26023.9  | 2 (2 0 0 0 0) |
|    | 3326          | K.ISQTATSHLTQITGNLTK.L                                                                                                       | 2043.07166 | -0.00375 | 3 | 1.56E-02 | 3.75  | 0.43 | 999.6    | 31/72         |
|    | 3385          | R.VFNNIDDYVK.K                                                                                                               | 1226.60522 | -0.00373 | 2 | 1.19E-04 | 3.45  | 0.48 | 1181.1   | 16/18         |
| 83 | gj 2765839    | emb CAB09722.1  rhesus D category VI type III protein [Homo sapiens]                                                         |            |          |   | 2.56E-04 | 20.18 |      | 45218.1  | 2 (2 0 0 0 0) |
|    | 3885          | K.YFDDQVFWK.F                                                                                                                | 1247.57312 | 0.00017  | 2 | 2.56E-04 | 3.61  | 0.41 | 865.5    | 15/16         |
|    | 3997          | K.FPHLAVGF.-                                                                                                                 | 887.47742  | -0.00087 | 2 | 3.85E-04 | 2.88  | 0.52 | 773.6    | 13/14         |
| 84 | psu PFL1005c  | organism=Plasmodium_falciparum_3D7   product=chromodomain protein   location=MAL12:831245-83                                 |            |          |   | 3.44E-08 | 20.18 |      | 30999.3  | 2 (2 0 0 0 0) |
|    | 3183          | K.NESPQWVEETNIR.R                                                                                                            | 1601.75537 | 0.00591  | 2 | 3.44E-08 | 3.51  | 0.58 | 1512.4   | 20/24         |
|    | 4129          | K.NLHNVDGELYISVIHNINK.E                                                                                                      | 2306.18872 | 0.00161  | 4 | 3.83E-02 | 3.24  | 0.34 | 1317.7   | 37/114        |
| 85 | psu PF14_0098 | organism=Plasmodium_falciparum_3D7   product=hypothetical protein   location=MAL14:392972-393                                |            |          |   | 1.23E-06 | 20.18 |      | 34930.4  | 2 (2 0 0 0 0) |
|    | 3547          | K.NLNDNVDVILTK.K                                                                                                             | 1357.73218 | 0.00688  | 2 | 1.82E-03 | 3.59  | 0.48 | 1393.7   | 19/22         |
|    | 3911          | K.NYIYNDPSDLLIR.A                                                                                                            | 1595.80640 | 0.00078  | 2 | 1.23E-06 | 2.35  | 0.31 | 447.8    | 14/24         |
| 86 | psu PFC1020c  | organism=Plasmodium_falciparum_3D7   product=40S ribosomal protein S3A, putative   location=MAL11:1121928-1                  |            |          |   | 3.34E-05 | 20.18 |      | 30028.3  | 2 (2 0 0 0 0) |
|    | 2923          | K.GYTLIEGHTDVK.T                                                                                                             | 1332.67944 | -0.00044 | 2 | 3.34E-05 | 3.56  | 0.49 | 1393.1   | 19/22         |
|    | 4013          | K.IYPLQNVLIR.K                                                                                                               | 1228.74121 | -0.00020 | 2 | 1.43E-02 | 2.18  | 0.23 | 253.7    | 13/18         |
| 87 | psu PF11_0071 | organism=Plasmodium_falciparum_3D7   product=RuvB DNA helicase, putative   location=MAL11:25                                 |            |          |   | 4.21E-04 | 20.17 |      | 53372.5  | 2 (2 0 0 0 0) |

|     |                            |                                                                                                   |            |          |   |          |       |      |          |               |
|-----|----------------------------|---------------------------------------------------------------------------------------------------|------------|----------|---|----------|-------|------|----------|---------------|
|     | 4793                       | R.AIESPLAPILIMATNR.G                                                                              | 1709.96179 | 0.00065  | 3 | 1.36E-03 | 3.50  | 0.49 | 778.2    | 23/60         |
|     | 4683 - 4685                | R.EASLFLVDLIK.Q                                                                                   | 1247.72461 | -0.00032 | 2 | 4.21E-04 | 2.34  | 0.52 | 953.2    | 15/20         |
| 88  | psu PF14_0563              | organism=Plasmodium_falciparum_3D7   product=DEAD-box RNA helicase, putative   location=MAL1      |            |          |   | 1.27E-05 | 20.17 |      | 84261.7  | 2 (2 0 0 0 0) |
|     | 4987                       | K.IDNELIQLTYLK.F                                                                                  | 1575.89929 | -0.00007 | 2 | 1.27E-05 | 3.43  | 0.52 | 1470.6   | 17/24         |
|     | 1802                       | R.IGDTLNNTSNQR.V                                                                                  | 1332.65027 | -0.00008 | 2 | 1.06E-04 | 2.83  | 0.39 | 538.1    | 13/22         |
| 89  | psu MAL8P1.53              | organism=Plasmodium_falciparum_3D7   product=hypothetical protein, conserved   location=MAL8:9    |            |          |   | 1.47E-05 | 20.17 |      | 60504.5  | 2 (2 0 0 0 0) |
|     | 3853                       | R.HNIDLLPIYIHGAK.T                                                                                | 1603.89551 | 0.00107  | 3 | 1.47E-05 | 3.34  | 0.59 | 1143.1   | 27/52         |
|     | 3095                       | K.ELYNGNIVMNNK.G                                                                                  | 1408.68896 | -0.00166 | 2 | 1.45E-01 | 2.77  | 0.42 | 947.6    | 15/22         |
| 90  | psu PF11_0506              | organism=Plasmodium_falciparum_3D7   product=hypothetical protein   location=MAL11:1950207-19     |            |          |   | 2.27E-04 | 20.17 |      | 66258.1  | 2 (2 0 0 0 0) |
|     | 1565                       | K.IKPTYEENDEDK.S                                                                                  | 1480.68018 | -0.00369 | 3 | 1.33E-03 | 3.33  | 0.41 | 878.6    | 25/44         |
|     | 1903                       | K.KDEYDIQSR.V                                                                                     | 1153.54834 | -0.00105 | 2 | 2.27E-04 | 2.41  | 0.37 | 576.2    | 12/16         |
| 91  | psu PF13_0224              | organism=Plasmodium_falciparum_3D7   product=60S ribosomal subunit protein L18, putative   locat  |            |          |   | 1.74E-05 | 20.17 |      | 21732.7  | 2 (2 0 0 0 0) |
|     | 3939                       | R.FPALHPLTLQK.E                                                                                   | 1264.74121 | -0.00137 | 3 | 2.12E-02 | 3.31  | 0.38 | 899.0    | 23/40         |
|     | 4031                       | K.EGAIQLYSEMAGR.H                                                                                 | 1495.72095 | 0.00029  | 2 | 1.74E-05 | 2.52  | 0.55 | 520.7    | 13/26         |
| 92  | psu MAL13P1.50             | organism=Plasmodium_falciparum_3D7   product=hypothetical protein, conserved   location=MAL13     |            |          |   | 2.47E-05 | 20.17 |      | 24397.8  | 2 (2 0 0 0 0) |
|     | 3903                       | K.SNLIVNNIVFK.A                                                                                   | 1260.73108 | 0.00066  | 2 | 2.47E-05 | 3.31  | 0.49 | 1005.3   | 16/20         |
|     | 3981                       | R.IYDFLIPK.K                                                                                      | 1008.57642 | -0.00038 | 2 | 4.13E-02 | 2.60  | 0.35 | 501.6    | 11/14         |
| 93  | psu PFF1415c               | organism=Plasmodium_falciparum_3D7   product=DNAJ domain protein, putative   location=MAL6:119    |            |          |   | 8.32E-05 | 20.16 |      | 44641.0  | 2 (2 0 0 0 0) |
|     | 3534                       | K.TITQQVAPGFIMQNK.I                                                                               | 1675.88354 | 0.00774  | 2 | 8.32E-05 | 3.28  | 0.51 | 830.9    | 18/28         |
|     | 4118                       | K.FSEIAEAYEILGDEEKR.K                                                                             | 1998.96545 | 0.00114  | 3 | 1.35E-01 | 2.96  | 0.42 | 353.8    | 22/64         |
| 94  | psu PF14_0036              | organism=Plasmodium_falciparum_3D7   product=acid phosphatase, putative   location=MAL14:1414     |            |          |   | 9.74E-06 | 20.16 |      | 35800.9  | 2 (2 0 0 0 0) |
|     | 4045                       | K.FPLDPIQTNQITDLK.N                                                                               | 1742.93237 | 0.00225  | 2 | 2.61E-05 | 3.23  | 0.42 | 1621.5   | 24/28         |
|     | 3231 - 3233                | K.QITISAVGMQAK.D                                                                                  | 1246.68237 | -0.00245 | 2 | 9.74E-06 | 2.81  | 0.50 | 834.0    | 17/22         |
| 95  | psu PFI0935w               | organism=Plasmodium_falciparum_3D7   product=DNAJ-like molecular chaperone protein, putative   lo |            |          |   | 1.07E-04 | 20.16 |      | 43232.6  | 2 (2 0 0 0 0) |
|     | 2813                       | K.IYHPDKNPDESANSSFIK.L                                                                            | 2061.98755 | -0.00108 | 4 | 2.05E-04 | 3.22  | 0.30 | 1210.6   | 39/102        |
|     | 3243                       | K.QAYDVLTDVDR.R                                                                                   | 1294.62732 | -0.00178 | 2 | 1.07E-04 | 2.22  | 0.45 | 687.8    | 17/20         |
| 96  | psu PFI1730w               | organism=Plasmodium_falciparum_3D7   product=cytoadherence linked asexual protein 9 (CLAG9)   lo  |            |          |   | 4.05E-04 | 20.15 |      | 160312.3 | 2 (2 0 0 0 0) |
|     | 3291                       | R.LSVHDEPFLR.F                                                                                    | 1212.63721 | -0.00095 | 3 | 6.15E-04 | 3.06  | 0.39 | 1120.2   | 22/36         |
|     | 1757                       | K.FSQENDPVSK.V                                                                                    | 1150.53748 | 0.00041  | 2 | 4.05E-04 | 2.95  | 0.38 | 1096.7   | 14/18         |
| 97  | gj 34526448 dbj BAC85240.1 | unnamed protein product [Homo sapiens] [MASS=53025]                                               |            |          |   | 5.84E-04 | 20.15 |      | 52992.1  | 2 (2 0 0 0 0) |
|     | 2477                       | K.VTMQNLNDR.L                                                                                     | 1090.53101 | 0.00029  | 2 | 5.84E-04 | 3.05  | 0.38 | 1027.4   | 14/16         |
|     | 3287 - 3289                | K.DAEAWFNEK.S                                                                                     | 1109.48987 | -0.00313 | 2 | 1.22E-01 | 2.11  | 0.39 | 723.4    | 12/16         |
| 98  | psu PF07_0042              | organism=Plasmodium_falciparum_3D7   product=hypothetical protein, conserved   location=MAL7:5    |            |          |   | 5.18E-04 | 20.15 |      | 350482.6 | 2 (2 0 0 0 0) |
|     | 2098                       | K.NDQNGYINEEEKNETK.T                                                                              | 1924.85193 | -0.00186 | 3 | 5.96E-02 | 2.96  | 0.34 | 625.9    | 23/60         |
|     | 1513                       | K.NYPNTQNNNTYK.S                                                                                  | 1585.68774 | -0.00349 | 2 | 5.18E-04 | 2.34  | 0.38 | 118.8    | 12/24         |
| 99  | psu PFF1430c               | organism=Plasmodium_falciparum_3D7   product=amino acid transporter   location=MAL6:1213950-12    |            |          |   | 7.64E-04 | 20.14 |      | 68815.1  | 2 (2 0 0 0 0) |
|     | 3075                       | K.SYNNLLINK.E                                                                                     | 1078.58911 | -0.00032 | 2 | 6.82E-02 | 2.79  | 0.13 | 788.0    | 13/16         |
|     | 1634                       | K.NTETYTNVNDK.K                                                                                   | 1298.58594 | -0.00069 | 2 | 7.64E-04 | 2.12  | 0.41 | 251.3    | 11/20         |
| 100 | psu PF13_0014              | organism=Plasmodium_falciparum_3D7   product=40S ribosomal protein S7 homologue, putative   lo    |            |          |   | 7.94E-04 | 20.14 |      | 22466.6  | 2 (2 0 0 0 0) |
|     | 5145                       | R.TLTSVYDSILEDIVSPSEIIGK.R                                                                        | 2379.25415 | 0.00298  | 2 | 7.94E-04 | 2.64  | 0.45 | 340.1    | 14/42         |
|     | 4042                       | K.TILIYIPYK.I                                                                                     | 1123.67615 | -0.00081 | 2 | 1.06E-02 | 2.07  | 0.39 | 542.8    | 12/16         |
| 101 | psu PFL2005w               | organism=Plasmodium_falciparum_3D7   product=replication factor c subunit 4   location=MAL12:1776 |            |          |   | 5.40E-04 | 20.13 |      | 37613.7  | 2 (2 0 0 0 0) |

|     |                                                                                                               |                             |            |          |   |          |       |      |          |               |
|-----|---------------------------------------------------------------------------------------------------------------|-----------------------------|------------|----------|---|----------|-------|------|----------|---------------|
|     | 4653                                                                                                          | K.IIILDEVDSMTTAAQQLR.R      | 2104.09546 | 0.00186  | 3 | 5.40E-04 | 2.53  | 0.30 | 571.4    | 26/72         |
|     | 2783                                                                                                          | K.IIDALQSR.C                | 915.52582  | 0.00993  | 2 | 3.05E-03 | 2.18  | 0.20 | 579.4    | 13/14         |
| 102 | psu PF11_0507   organism=Plasmodium_falciparum_3D7   product=antigen 332, putative   location=MAL11:1952200-1 |                             |            |          |   | 3.07E-04 | 20.12 |      | 620797.5 | 2 (2 0 0 0 0) |
|     | 2838                                                                                                          | K.NVSEEIPVEEK.N             | 1272.63184 | -0.00203 | 2 | 3.07E-04 | 2.16  | 0.40 | 630.9    | 13/20         |
|     | 2815                                                                                                          | K.SVSEEIPVEEK.S             | 1245.62085 | 0.00029  | 2 | 1.78E-03 | 2.15  | 0.27 | 657.4    | 13/20         |
| 103 | psu PFL1725w   organism=Plasmodium_falciparum_3D7   product=ATP synthase beta chain, mitochondrial precursor, |                             |            |          |   | 3.02E-04 | 18.14 |      | 58357.6  | 2 (1 1 0 0 0) |
|     | 5213                                                                                                          | R.FVELEDTIIGFSELLK.G        | 1852.99426 | -0.00027 | 3 | 5.50E-03 | 2.85  | 0.15 | 819.5    | 23/60         |
|     | 5086                                                                                                          | K.SLQDIIAILGIDELSEQDK.L     | 2100.10718 | -0.00027 | 3 | 3.02E-04 | 2.81  | 0.45 | 935.4    | 24/72         |
| 104 | psu PFB0960c   organism=Plasmodium_falciparum_3D7   product=Plasmodium falciparum Maurer's Cleft 2 transmembr |                             |            |          |   | 4.07E-07 | 16.19 |      | 14319.7  | 2 (0 2 0 0 0) |
|     | 4656                                                                                                          | K.TNLDPQTSSLVRLVDNMNITQE.K  | 2616.32983 | -0.04476 | 3 | 4.07E-07 | 3.82  | 0.41 | 939.2    | 27/88         |
|     | 4542                                                                                                          | K.KTNLDPQTSSLVRLVDNMNITQE.K | 2744.42480 | -0.04391 | 3 | 5.60E-03 | 3.61  | 0.54 | 762.8    | 25/92         |
