# Supplementary material for: A Major Role for the Plasmodium falciparum ApiAP2 Protein PfSIP2 in Chromosome End Biology
Source: PubMed Central journal article supplement (PMC2829057; doi:10.1371/journal.ppat.1000784), 2010-02-26
Supplement: ppat.1000784.s007.pdf [file ppat.1000784.s007.pdf]

**Table S3: Genome-wide SPE2 prediction**

| chromosome | SPE2 start | SPE2 end | PfnSIP2-HA ChIP-on-chip plus/minus strand | chromosomal landmark | distance to previous SPE2 | 5bp spacing | Accession | Comments | plus/minus strand | ATG    |
|------------|------------|----------|-------------------------------------------|----------------------|---------------------------|-------------|-----------|----------|-------------------|--------|
| chr1       | 2385       | 2400     | +                                         | -1 TARE              |                           |             |           |          |                   |        |
| chr1       | 2520       | 2535     | +                                         | -1 TARE              | 120                       |             |           |          |                   |        |
| chr1       | 2790       | 2805     | +                                         | -1 TARE              | 255                       |             |           |          |                   |        |
| chr1       | 2925       | 2940     | +                                         | -1 TARE              | 120                       |             |           |          |                   |        |
| chr1       | 3060       | 3075     | +                                         | -1 TARE              | 120                       |             |           |          |                   |        |
| chr1       | 3351       | 3366     | +                                         | -1 TARE              | 276                       |             |           |          |                   |        |
| chr1       | 3486       | 3501     | +                                         | -1 TARE              | 120                       |             |           |          |                   |        |
| chr1       | 3621       | 3636     | +                                         | -1 TARE              | 120                       |             |           |          |                   |        |
| chr1       | 3756       | 3771     | +                                         | -1 TARE              | 120                       |             |           |          |                   |        |
| chr1       | 4047       | 4062     | +                                         | -1 TARE              | 276                       |             |           |          |                   |        |
| chr1       | 4684       | 4699     | +                                         | -1 TARE              | 622                       |             |           |          |                   |        |
| chr1       | 4840       | 4855     | +                                         | 1 TARE               | 141                       |             |           |          |                   |        |
| chr1       | 5022       | 5037     | +                                         | -1 TARE              | 167                       |             |           |          |                   |        |
| chr1       | 5367       | 5382     | +                                         | 1 TARE               | 330                       |             |           |          |                   |        |
| chr1       | 5497       | 5513     | +                                         | -1 TARE              | 115                       | 5           |           |          |                   |        |
| chr1       | 6210       | 6225     | +                                         | -1 TARE              | 697                       |             |           |          |                   |        |
| chr1       | 6464       | 6479     | +                                         | 1 TARE               | 239                       |             |           |          |                   |        |
| chr1       | 7842       | 7857     | +                                         | 1 TARE               | 1363                      |             |           |          |                   |        |
| chr1       | 9452       | 9467     | +                                         | -1 TARE              | 1595                      |             |           |          |                   |        |
| chr1       | 27336      | 27352    | +                                         | 1 var                |                           | 5           | PFA0005w  |          | 1                 | 29733  |
| chr1       | 27338      | 27354    | +                                         | -1 var               | -14                       | 5           | PFA0005w  |          |                   |        |
| chr1       | 27394      | 27410    | +                                         | 1 var                | 40                        | 5           | PFA0005w  |          |                   |        |
| chr1       | 27396      | 27412    | +                                         | -1 var               | -14                       | 5           | PFA0005w  |          |                   |        |
| chr1       | 27511      | 27526    | +                                         | 1 var                | 99                        |             | PFA0005w  |          |                   |        |
| chr1       | 27538      | 27553    | +                                         | 1 var                | 12                        |             | PFA0005w  |          |                   |        |
| chr1       | 27560      | 27575    | +                                         | 1 var                | 7                         |             | PFA0005w  |          |                   |        |
| chr1       | 27588      | 27603    | +                                         | 1 var                | 13                        |             | PFA0005w  |          |                   |        |
| chr1       | 612437     | 612452   | +                                         | -1 var               |                           |             | PFA0765c  | exon1    |                   |        |
| chr1       | 618900     | 618915   | +                                         | -1 var               |                           |             | PFA0765c  |          | -1                | 616613 |
| chr1       | 618927     | 618942   | +                                         | -1 var               | 12                        |             | PFA0765c  |          |                   |        |
| chr1       | 618949     | 618964   | +                                         | -1 var               | 7                         |             | PFA0765c  |          |                   |        |
| chr1       | 618977     | 618992   | +                                         | -1 var               | 13                        |             | PFA0765c  |          |                   |        |
| chr1       | 619000     | 619015   | +                                         | -1 var               | 8                         |             | PFA0765c  |          |                   |        |
| chr1       | 619026     | 619041   | +                                         | -1 var               | 11                        |             | PFA0765c  |          |                   |        |
| chr1       | 619053     | 619068   | +                                         | -1 var               | 12                        |             | PFA0765c  |          |                   |        |
| chr1       | 619075     | 619090   | +                                         | -1 var               | 7                         |             | PFA0765c  |          |                   |        |
| chr1       | 619097     | 619112   | +                                         | -1 var               | 7                         |             | PFA0765c  |          |                   |        |
| chr1       | 619408     | 619424   | +                                         | 1 var                | 296                       | 5           | PFA0765c  |          |                   |        |
| chr1       | 619410     | 619426   | +                                         | -1 var               | -14                       | 5           | PFA0765c  |          |                   |        |
| chr1       | 619508     | 619524   | +                                         | 1 var                | 82                        | 5           | PFA0765c  |          |                   |        |
| chr1       | 619510     | 619526   | +                                         | -1 var               | -14                       | 5           | PFA0765c  |          |                   |        |
| chr10      | 2015       | 2030     | +                                         | -1 TARE              |                           |             |           |          |                   |        |
| chr10      | 2150       | 2165     | +                                         | -1 TARE              | 120                       |             |           |          |                   |        |
| chr10      | 2285       | 2300     | +                                         | -1 TARE              | 120                       |             |           |          |                   |        |
| chr10      | 2420       | 2435     | +                                         | -1 TARE              | 120                       |             |           |          |                   |        |
| chr10      | 2555       | 2570     | +                                         | -1 TARE              | 120                       |             |           |          |                   |        |
| chr10      | 2690       | 2705     | +                                         | -1 TARE              | 120                       |             |           |          |                   |        |
| chr10      | 3116       | 3131     | +                                         | -1 TARE              | 411                       |             |           |          |                   |        |
| chr10      | 3251       | 3266     | +                                         | -1 TARE              | 120                       |             |           |          |                   |        |
| chr10      | 3677       | 3692     | +                                         | -1 TARE              | 411                       |             |           |          |                   |        |
| chr10      | 4331       | 4346     | +                                         | -1 TARE              | 639                       |             |           |          |                   |        |
| chr10      | 4487       | 4502     | +                                         | 1 TARE               | 141                       |             |           |          |                   |        |
| chr10      | 4669       | 4684     | +                                         | -1 TARE              | 167                       |             |           |          |                   |        |
| chr10      | 5014       | 5029     | +                                         | 1 TARE               | 330                       |             |           |          |                   |        |
| chr10      | 5144       | 5160     | +                                         | -1 TARE              | 115                       | 5           |           |          |                   |        |
| chr10      | 5422       | 5437     | +                                         | 1 TARE               | 262                       |             |           |          |                   |        |
| chr10      | 6112       | 6127     | +                                         | 1 TARE               | 675                       |             |           |          |                   |        |
| chr10      | 8180       | 8195     | +                                         | 1 TARE               | 2053                      |             |           |          |                   |        |
| chr10      | 9799       | 9814     | +                                         | -1 TARE              | 1604                      |             |           |          |                   |        |
| chr10      | 25587      | 25602    | +                                         | 1 var                |                           |             | PF10_0001 |          | 1                 | 28491  |
| chr10      | 25610      | 25625    | +                                         | 1 var                | 8                         |             | PF10_0001 |          |                   |        |
| chr10      | 25638      | 25653    | +                                         | 1 var                | 13                        |             | PF10_0001 |          |                   |        |
| chr10      | 25662      | 25677    | +                                         | 1 var                | 9                         |             | PF10_0001 |          |                   |        |
| chr10      | 25686      | 25701    | +                                         | 1 var                | 9                         |             | PF10_0001 |          |                   |        |
| chr10      | 25710      | 25725    | +                                         | 1 var                | 9                         |             | PF10_0001 |          |                   |        |
| chr10      | 25736      | 25751    | +                                         | 1 var                | 11                        |             | PF10_0001 |          |                   |        |
| chr10      | 25763      | 25778    | +                                         | 1 var                | 12                        |             | PF10_0001 |          |                   |        |
| chr10      | 25790      | 25805    | +                                         | 1 var                | 12                        |             | PF10_0001 |          |                   |        |
| chr10      | 25817      | 25832    | +                                         | 1 var                | 12                        |             | PF10_0001 |          |                   |        |
| chr10      | 25844      | 25859    | +                                         | 1 var                | 12                        |             | PF10_0001 |          |                   |        |
| chr10      | 25871      | 25886    | +                                         | 1 var                | 12                        |             | PF10_0001 |          |                   |        |

|       |         |         |   |    |                         |  |      |             |  |    |         |
|-------|---------|---------|---|----|-------------------------|--|------|-------------|--|----|---------|
| chr10 | 25898   | 25913   | + | 1  | var                     |  | 12   | PF10_0001   |  |    |         |
| chr10 | 25925   | 25940   | + | 1  | var                     |  | 12   | PF10_0001   |  |    |         |
| chr10 | 25952   | 25967   | + | 1  | var                     |  | 12   | PF10_0001   |  |    |         |
| chr10 | 25979   | 25994   | + | 1  | var                     |  | 12   | PF10_0001   |  |    |         |
| chr10 | 26006   | 26021   | + | 1  | var                     |  | 12   | PF10_0001   |  |    |         |
| chr10 | 26033   | 26048   | + | 1  | var                     |  | 12   | PF10_0001   |  |    |         |
| chr10 | 26060   | 26075   | + | 1  | var                     |  | 12   | PF10_0001   |  |    |         |
| chr10 | 26087   | 26102   | + | 1  | var                     |  | 12   | PF10_0001   |  |    |         |
| chr10 | 26114   | 26129   | + | 1  | var                     |  | 12   | PF10_0001   |  |    |         |
| chr10 | 26141   | 26156   | + | 1  | var                     |  | 12   | PF10_0001   |  |    |         |
| chr10 | 26168   | 26183   | + | 1  | var                     |  | 12   | PF10_0001   |  |    |         |
| chr10 | 26195   | 26210   | + | 1  | var                     |  | 12   | PF10_0001   |  |    |         |
| chr10 | 26222   | 26237   | + | 1  | var                     |  | 12   | PF10_0001   |  |    |         |
| chr10 | 26250   | 26265   | + | 1  | var                     |  | 13   | PF10_0001   |  |    |         |
| chr10 | 26277   | 26292   | + | 1  | var                     |  | 12   | PF10_0001   |  |    |         |
| chr10 | 26304   | 26319   | + | 1  | var                     |  | 12   | PF10_0001   |  |    |         |
| chr10 | 26331   | 26346   | + | 1  | var                     |  | 12   | PF10_0001   |  |    |         |
| chr10 | 159324  | 159339  | - | 1  | hyp                     |  |      | PF10_0037   |  | -1 | 158517  |
| chr10 | 609000  | 609015  |   | 1  | FAD synthetase putative |  |      | PF10_0147   |  | 1  | 611212  |
| chr10 | 691351  | 691366  | - | 1  | hyp                     |  |      | PF10_0166   |  | -1 | 690819  |
| chr10 | 772648  | 772663  | - | 1  | hyp                     |  |      | PF10_0184   |  | -1 | 771953  |
| chr10 | 1652090 | 1652105 | + | -1 | var                     |  |      | PF10_0406   |  | -1 | 1649947 |
| chr10 | 1652114 | 1652129 | + | -1 | var                     |  | 9    | PF10_0406   |  |    |         |
| chr10 | 1652141 | 1652156 | + | -1 | var                     |  | 12   | PF10_0406   |  |    |         |
| chr10 | 1652169 | 1652184 | + | -1 | var                     |  | 13   | PF10_0406   |  |    |         |
| chr10 | 1652191 | 1652206 | + | -1 | var                     |  | 7    | PF10_0406   |  |    |         |
| chr10 | 1652213 | 1652228 | + | -1 | var                     |  | 7    | PF10_0406   |  |    |         |
| chr10 | 1652240 | 1652255 | + | -1 | var                     |  | 12   | PF10_0406   |  |    |         |
| chr10 | 1652267 | 1652282 | + | -1 | var                     |  | 12   | PF10_0406   |  |    |         |
| chr10 | 1652294 | 1652309 | + | -1 | var                     |  | 12   | PF10_0406   |  |    |         |
| chr10 | 1652321 | 1652336 | + | -1 | var                     |  | 12   | PF10_0406   |  |    |         |
| chr10 | 1652348 | 1652363 | + | -1 | var                     |  | 12   | PF10_0406   |  |    |         |
| chr10 | 1652375 | 1652390 | + | -1 | var                     |  | 12   | PF10_0406   |  |    |         |
| chr10 | 1652402 | 1652417 | + | -1 | var                     |  | 12   | PF10_0406   |  |    |         |
| chr10 | 1652429 | 1652444 | + | -1 | var                     |  | 12   | PF10_0406   |  |    |         |
| chr10 | 1652735 | 1652751 | + | 1  | var                     |  | 291  | 5 PF10_0406 |  |    |         |
| chr10 | 1652737 | 1652753 | + | -1 | var                     |  | -14  | 5 PF10_0406 |  |    |         |
| chr10 | 1678016 | 1678031 |   | 1  | TARE                    |  |      |             |  |    |         |
| chr10 | 1679643 | 1679658 |   | -1 | TARE                    |  | 1612 |             |  |    |         |
| chr10 | 1681711 | 1681726 | + | -1 | TARE                    |  | 2053 |             |  |    |         |
| chr10 | 1682119 | 1682134 | + | -1 | TARE                    |  | 393  |             |  |    |         |
| chr10 | 1682464 | 1682479 | + | 1  | TARE                    |  | 330  |             |  |    |         |
| chr10 | 1682646 | 1682661 | + | -1 | TARE                    |  | 167  |             |  |    |         |
| chr10 | 1682802 | 1682817 | + | 1  | TARE                    |  | 141  |             |  |    |         |
| chr10 | 1683437 | 1683452 | + | 1  | TARE                    |  | 620  |             |  |    |         |
| chr10 | 1683728 | 1683743 | + | 1  | TARE                    |  | 276  |             |  |    |         |
| chr10 | 1683863 | 1683878 | + | 1  | TARE                    |  | 120  |             |  |    |         |
| chr10 | 1683998 | 1684013 | + | 1  | TARE                    |  | 120  |             |  |    |         |
| chr10 | 1684289 | 1684304 | + | 1  | TARE                    |  | 276  |             |  |    |         |
| chr10 | 1684424 | 1684439 | + | 1  | TARE                    |  | 120  |             |  |    |         |
| chr10 | 1684559 | 1684574 | + | 1  | TARE                    |  | 120  |             |  |    |         |
| chr10 | 1684694 | 1684709 | + | 1  | TARE                    |  | 120  |             |  |    |         |
| chr10 | 1684829 | 1684844 | + | 1  | TARE                    |  | 120  |             |  |    |         |
| chr10 | 1684964 | 1684979 | + | 1  | TARE                    |  | 120  |             |  |    |         |
| chr11 | 2559    | 2574    | - | -1 | TARE                    |  |      |             |  |    |         |
| chr11 | 2694    | 2709    | - | -1 | TARE                    |  | 120  |             |  |    |         |
| chr11 | 2964    | 2979    | + | -1 | TARE                    |  | 255  |             |  |    |         |
| chr11 | 3099    | 3114    | + | -1 | TARE                    |  | 120  |             |  |    |         |
| chr11 | 3234    | 3249    | + | -1 | TARE                    |  | 120  |             |  |    |         |
| chr11 | 3660    | 3675    | + | -1 | TARE                    |  | 411  |             |  |    |         |
| chr11 | 3795    | 3810    | + | -1 | TARE                    |  | 120  |             |  |    |         |
| chr11 | 3930    | 3945    | + | -1 | TARE                    |  | 120  |             |  |    |         |
| chr11 | 4065    | 4080    | + | -1 | TARE                    |  | 120  |             |  |    |         |
| chr11 | 4221    | 4236    | + | -1 | TARE                    |  | 141  |             |  |    |         |
| chr11 | 4855    | 4870    | + | -1 | TARE                    |  | 619  |             |  |    |         |
| chr11 | 5011    | 5026    | + | 1  | TARE                    |  | 141  |             |  |    |         |
| chr11 | 5193    | 5208    | + | -1 | TARE                    |  | 167  |             |  |    |         |
| chr11 | 5538    | 5553    | + | 1  | TARE                    |  | 330  |             |  |    |         |
| chr11 | 5668    | 5684    | + | -1 | TARE                    |  | 115  | 5           |  |    |         |
| chr11 | 5946    | 5961    | + | 1  | TARE                    |  | 262  |             |  |    |         |
| chr11 | 6636    | 6651    | + | 1  | TARE                    |  | 675  |             |  |    |         |
| chr11 | 8016    | 8031    | + | 1  | TARE                    |  | 1365 |             |  |    |         |
| chr11 | 9173    | 9189    | + | 1  | TARE                    |  | 1142 |             |  |    |         |
| chr11 | 9635    | 9650    | - | -1 | TARE                    |  | 446  |             |  |    |         |
| chr11 | 21536   | 21552   | + | 1  | var                     |  |      | 5 PF11_0007 |  | 1  | 24160   |
| chr11 | 21538   | 21554   | + | -1 | var                     |  | -14  | 5 PF11_0007 |  |    |         |
| chr11 | 21900   | 21915   | + | 1  | var                     |  | 346  | PF11_0007   |  |    |         |
| chr11 | 21928   | 21943   | + | 1  | var                     |  | 13   | PF11_0007   |  |    |         |
| chr11 | 21955   | 21970   | + | 1  | var                     |  | 12   | PF11_0007   |  |    |         |
| chr11 | 21983   | 21998   | + | 1  | var                     |  | 13   | PF11_0007   |  |    |         |
| chr11 | 22006   | 22021   | + | 1  | var                     |  | 8    | PF11_0007   |  |    |         |
| chr11 | 22034   | 22049   | + | 1  | var                     |  | 13   | PF11_0007   |  |    |         |
| chr11 | 22058   | 22073   | + | 1  | var                     |  | 9    | PF11_0007   |  |    |         |
| chr11 | 22084   | 22099   | + | 1  | var                     |  | 11   | PF11_0007   |  |    |         |

|       |         |         |    |           |      |      |           |           |    |         |
|-------|---------|---------|----|-----------|------|------|-----------|-----------|----|---------|
| chr11 | 490720  | 490735  | 1  | hyp       |      |      | PF11_0528 |           | 1  | 492090  |
| chr11 | 607322  | 607337  | 1  | hyp       |      |      | PF11_0168 | intron    | -1 | 613393  |
| chr11 | 663498  | 663513  | 1  | hyp       |      |      | PF11_0179 |           | 1  | 664162  |
| chr11 | 1606698 | 1606714 | -1 | hyp       |      | 5    | PF11_0414 | PF11_0415 | 1  |         |
| chr12 | 1879    | 1894    | -1 | TARE      |      |      |           |           |    |         |
| chr12 | 2014    | 2029    | +  | -1        | TARE | 120  |           |           |    |         |
| chr12 | 2149    | 2164    | +  | -1        | TARE | 120  |           |           |    |         |
| chr12 | 2284    | 2299    | +  | -1        | TARE | 120  |           |           |    |         |
| chr12 | 2419    | 2434    | +  | -1        | TARE | 120  |           |           |    |         |
| chr12 | 2554    | 2569    | +  | -1        | TARE | 120  |           |           |    |         |
| chr12 | 2845    | 2860    | +  | -1        | TARE | 276  |           |           |    |         |
| chr12 | 2980    | 2995    | +  | -1        | TARE | 120  |           |           |    |         |
| chr12 | 3115    | 3130    | +  | -1        | TARE | 120  |           |           |    |         |
| chr12 | 3541    | 3556    | +  | -1        | TARE | 411  |           |           |    |         |
| chr12 | 4176    | 4191    | +  | -1        | TARE | 620  |           |           |    |         |
| chr12 | 4332    | 4347    | +  | 1         | TARE | 141  |           |           |    |         |
| chr12 | 4514    | 4529    | +  | -1        | TARE | 167  |           |           |    |         |
| chr12 | 4859    | 4874    | +  | 1         | TARE | 330  |           |           |    |         |
| chr12 | 4989    | 5005    | +  | -1        | TARE | 115  | 5         |           |    |         |
| chr12 | 7335    | 7350    | 1  | TARE      | 2330 |      |           |           |    |         |
| chr12 | 8316    | 8331    | -1 | TARE      | 966  |      |           |           |    |         |
| chr12 | 8955    | 8970    | -1 | TARE      | 624  |      |           |           |    |         |
| chr12 | 14401   | 14417   | +  | 1         | var  | 5    | PFL0005w  |           | 1  | 16973   |
| chr12 | 14403   | 14419   | +  | -1        | var  | -14  | 5         | PFL0005w  |    |         |
| chr12 | 14727   | 14742   | +  | 1         | var  | 308  | PFL0005w  |           |    |         |
| chr12 | 14755   | 14770   | +  | 1         | var  | 13   | PFL0005w  |           |    |         |
| chr12 | 14783   | 14798   | +  | 1         | var  | 13   | PFL0005w  |           |    |         |
| chr12 | 14810   | 14825   | +  | 1         | var  | 12   | PFL0005w  |           |    |         |
| chr12 | 14838   | 14853   | +  | 1         | var  | 13   | PFL0005w  |           |    |         |
| chr12 | 14866   | 14881   | +  | 1         | var  | 13   | PFL0005w  |           |    |         |
| chr12 | 205902  | 205917  | -1 | hyp       |      |      | PFL0210c  | exon      | -1 | 205973  |
| chr12 | 347208  | 347224  | 1  | hyp       |      | 5    | PFL0370w  | exon 2    | 1  | 345917  |
| chr12 | 776402  | 776417  | -1 | var       |      |      | PFL0935c  | central   | -1 | 774190  |
| chr12 | 776456  | 776471  | -1 | var       |      | 39   | PFL0935c  | central   |    |         |
| chr12 | 855439  | 855454  | -1 | hyp       |      |      | PFL1025c  |           | -1 | 854732  |
| chr12 | 917547  | 917563  | 1  | hyp       |      | 5    | PFL1090w  |           | 1  | 918714  |
| chr12 | 2123397 | 2123412 | 1  | chitinase |      |      | PFL2510w  |           | 1  | 2125421 |
| chr12 | 2251020 | 2251035 | +  | -1        | var  |      | PFL2665c  |           | -1 | 2248945 |
| chr12 | 2251047 | 2251062 | +  | -1        | var  | 12   | PFL2665c  |           |    |         |
| chr12 | 2251074 | 2251089 | +  | -1        | var  | 12   | PFL2665c  |           |    |         |
| chr12 | 2251101 | 2251116 | +  | -1        | var  | 12   | PFL2665c  |           |    |         |
| chr12 | 2251128 | 2251143 | +  | -1        | var  | 12   | PFL2665c  |           |    |         |
| chr12 | 2251155 | 2251170 | +  | -1        | var  | 12   | PFL2665c  |           |    |         |
| chr12 | 2251182 | 2251197 | +  | -1        | var  | 12   | PFL2665c  |           |    |         |
| chr12 | 2251209 | 2251224 | +  | -1        | var  | 12   | PFL2665c  |           |    |         |
| chr12 | 2251236 | 2251251 | +  | -1        | var  | 12   | PFL2665c  |           |    |         |
| chr12 | 2251263 | 2251278 | +  | -1        | var  | 12   | PFL2665c  |           |    |         |
| chr12 | 2251550 | 2251565 | +  | 1         | var  | 272  | PFL2665c  |           |    |         |
| chr12 | 2251552 | 2251567 | +  | -1        | var  | -13  | PFL2665c  |           |    |         |
| chr12 | 2251604 | 2251620 | +  | 1         | var  | 37   | 5         | PFL2665c  |    |         |
| chr12 | 2251606 | 2251622 | +  | -1        | var  | -14  | 5         | PFL2665c  |    |         |
| chr12 | 2251704 | 2251720 | +  | 1         | var  | 82   | 5         | PFL2665c  |    |         |
| chr12 | 2251706 | 2251722 | +  | -1        | var  | -14  | 5         | PFL2665c  |    |         |
| chr12 | 2262775 | 2262790 | 1  | TARE      |      |      |           |           |    |         |
| chr12 | 2264385 | 2264400 | -1 | TARE      | 1595 |      |           |           |    |         |
| chr12 | 2266730 | 2266746 | +  | 1         | TARE | 2330 | 5         |           |    |         |
| chr12 | 2266861 | 2266876 | +  | -1        | TARE | 115  |           |           |    |         |
| chr12 | 2267206 | 2267221 | +  | 1         | TARE | 330  |           |           |    |         |
| chr12 | 2267388 | 2267403 | +  | -1        | TARE | 167  |           |           |    |         |
| chr12 | 2267544 | 2267559 | 1  | TARE      | 141  |      |           |           |    |         |
| chr12 | 2268177 | 2268192 | 1  | TARE      | 618  |      |           |           |    |         |
| chr12 | 2268468 | 2268483 | +  | 1         | TARE | 276  |           |           |    |         |
| chr12 | 2268603 | 2268618 | +  | 1         | TARE | 120  |           |           |    |         |
| chr12 | 2268738 | 2268753 | +  | 1         | TARE | 120  |           |           |    |         |
| chr12 | 2268873 | 2268888 | +  | 1         | TARE | 120  |           |           |    |         |
| chr12 | 2269164 | 2269179 | +  | 1         | TARE | 276  |           |           |    |         |
| chr12 | 2269299 | 2269314 | +  | 1         | TARE | 120  |           |           |    |         |
| chr12 | 2269434 | 2269449 | +  | 1         | TARE | 120  |           |           |    |         |
| chr12 | 2269569 | 2269584 | +  | 1         | TARE | 120  |           |           |    |         |
| chr12 | 2269704 | 2269719 | 1  | TARE      | 120  |      |           |           |    |         |
| chr12 | 2269839 | 2269854 | 1  | TARE      | 120  |      |           |           |    |         |
| chr13 | 2605    | 2620    | -1 | TARE      |      |      |           |           |    |         |
| chr13 | 2740    | 2755    | -1 | TARE      | 120  |      |           |           |    |         |
| chr13 | 3010    | 3025    | -1 | TARE      | 255  |      |           |           |    |         |
| chr13 | 3145    | 3160    | -1 | TARE      | 120  |      |           |           |    |         |
| chr13 | 3280    | 3295    | -1 | TARE      | 120  |      |           |           |    |         |
| chr13 | 3571    | 3586    | -1 | TARE      | 276  |      |           |           |    |         |
| chr13 | 3706    | 3721    | -1 | TARE      | 120  |      |           |           |    |         |
| chr13 | 3841    | 3856    | -1 | TARE      | 120  |      |           |           |    |         |
| chr13 | 3976    | 3991    | -1 | TARE      | 120  |      |           |           |    |         |
| chr13 | 4111    | 4126    | -1 | TARE      | 120  |      |           |           |    |         |
| chr13 | 4267    | 4282    | -1 | TARE      | 141  |      |           |           |    |         |
| chr13 | 4906    | 4921    | -1 | TARE      | 624  |      |           |           |    |         |
| chr13 | 5062    | 5077    | 1  | TARE      | 141  |      |           |           |    |         |

|       |         |         |      |                  |      |   |             |             |    |         |
|-------|---------|---------|------|------------------|------|---|-------------|-------------|----|---------|
| chr13 | 5244    | 5259    | -1   | TARE             | 167  |   |             |             |    |         |
| chr13 | 5589    | 5604    | 1    | TARE             | 330  |   |             |             |    |         |
| chr13 | 5719    | 5735    | -1   | TARE             | 115  | 5 |             |             |    |         |
| chr13 | 5743    | 5758    | -1   | TARE             | 8    |   |             |             |    |         |
| chr13 | 8066    | 8081    | 1    | TARE             | 2308 |   |             |             |    |         |
| chr13 | 9685    | 9700    | -1   | TARE             | 1604 |   |             |             |    |         |
| chr13 | 18709   | 18725   | 1    | var              |      | 5 | MAL13P1.1   |             | 1  | 21467   |
| chr13 | 18711   | 18727   | -1   | var              | -14  | 5 | MAL13P1.1   |             |    |         |
| chr13 | 19004   | 19019   | 1    | var              | 277  |   | MAL13P1.1   |             |    |         |
| chr13 | 19032   | 19047   | 1    | var              | 13   |   | MAL13P1.1   |             |    |         |
| chr13 | 19060   | 19075   | 1    | var              | 13   |   | MAL13P1.1   |             |    |         |
| chr13 | 19088   | 19103   | 1    | var              | 13   |   | MAL13P1.1   |             |    |         |
| chr13 | 19116   | 19131   | 1    | var              | 13   |   | MAL13P1.1   |             |    |         |
| chr13 | 19144   | 19159   | 1    | var              | 13   |   | MAL13P1.1   |             |    |         |
| chr13 | 19172   | 19187   | 1    | var              | 13   |   | MAL13P1.1   |             |    |         |
| chr13 | 19200   | 19215   | 1    | var              | 13   |   | MAL13P1.1   |             |    |         |
| chr13 | 19228   | 19243   | 1    | var              | 13   |   | MAL13P1.1   |             |    |         |
| chr13 | 19256   | 19271   | 1    | var              | 13   |   | MAL13P1.1   |             |    |         |
| chr13 | 19284   | 19299   | 1    | var              | 13   |   | MAL13P1.1   |             |    |         |
| chr13 | 19312   | 19327   | 1    | var              | 13   |   | MAL13P1.1   |             |    |         |
| chr13 | 19340   | 19355   | 1    | var              | 13   |   | MAL13P1.1   |             |    |         |
| chr13 | 19367   | 19382   | 1    | var              | 12   |   | MAL13P1.1   |             |    |         |
| chr13 | 981644  | 981660  | -1   | hyp              |      | 5 | PF13_0134   | MAL13P1.130 | 1  |         |
| chr13 | 1331766 | 1331781 | 1    | hyp              |      |   | PF13_0173   |             | 1  | 1332497 |
| chr13 | 2866730 | 2866745 | + -1 | var              |      |   | MAL13P1.356 |             | -1 | 2864550 |
| chr13 | 2866752 | 2866767 | + -1 | var              | 7    |   | MAL13P1.356 |             |    |         |
| chr13 | 2866774 | 2866789 | + -1 | var              | 7    |   | MAL13P1.356 |             |    |         |
| chr13 | 2866796 | 2866811 | + -1 | var              | 7    |   | MAL13P1.356 |             |    |         |
| chr13 | 2866818 | 2866833 | + -1 | var              | 7    |   | MAL13P1.356 |             |    |         |
| chr13 | 2866840 | 2866855 | + -1 | var              | 7    |   | MAL13P1.356 |             |    |         |
| chr13 | 2866862 | 2866877 | + -1 | var              | 7    |   | MAL13P1.356 |             |    |         |
| chr13 | 2866884 | 2866899 | + -1 | var              | 7    |   | MAL13P1.356 |             |    |         |
| chr13 | 2866906 | 2866921 | + -1 | var              | 7    |   | MAL13P1.356 |             |    |         |
| chr13 | 2866928 | 2866943 | + -1 | var              | 7    |   | MAL13P1.356 |             |    |         |
| chr13 | 2866950 | 2866965 | + -1 | var              | 7    |   | MAL13P1.356 |             |    |         |
| chr13 | 2866972 | 2866987 | + -1 | var              | 7    |   | MAL13P1.356 |             |    |         |
| chr13 | 2866994 | 2867009 | + -1 | var              | 7    |   | MAL13P1.356 |             |    |         |
| chr13 | 2867212 | 2867228 | + 1  | var              | 203  | 5 | MAL13P1.356 |             |    |         |
| chr13 | 2867214 | 2867230 | + -1 | var              | -14  | 5 | MAL13P1.356 |             |    |         |
| chr13 | 2884497 | 2884512 | 1    | TARE             |      |   |             |             |    |         |
| chr13 | 2886105 | 2886120 | -1   | TARE             | 1593 |   |             |             |    |         |
| chr13 | 2887760 | 2887776 | + 1  | TARE             | 1640 | 5 |             |             |    |         |
| chr13 | 2888173 | 2888188 | + -1 | TARE             | 397  |   |             |             |    |         |
| chr13 | 2888450 | 2888466 | + 1  | TARE             | 262  | 5 |             |             |    |         |
| chr13 | 2888581 | 2888596 | + -1 | TARE             | 115  |   |             |             |    |         |
| chr13 | 2888926 | 2888941 | 1    | TARE             | 330  |   |             |             |    |         |
| chr13 | 2889108 | 2889123 | + -1 | TARE             | 167  |   |             |             |    |         |
| chr13 | 2889264 | 2889279 | + 1  | TARE             | 141  |   |             |             |    |         |
| chr13 | 2889840 | 2889855 | + 1  | TARE             | 561  |   |             |             |    |         |
| chr13 | 2890266 | 2890281 | + 1  | TARE             | 411  |   |             |             |    |         |
| chr13 | 2890401 | 2890416 | + 1  | TARE             | 120  |   |             |             |    |         |
| chr13 | 2890536 | 2890551 | + 1  | TARE             | 120  |   |             |             |    |         |
| chr13 | 2890827 | 2890842 | + 1  | TARE             | 276  |   |             |             |    |         |
| chr13 | 2890962 | 2890977 | + 1  | TARE             | 120  |   |             |             |    |         |
| chr13 | 2891097 | 2891112 | + 1  | TARE             | 120  |   |             |             |    |         |
| chr13 | 2891367 | 2891382 | 1    | TARE             | 255  |   |             |             |    |         |
| chr13 | 2891502 | 2891517 | 1    | TARE             | 120  |   |             |             |    |         |
| chr14 | 657954  | 657969  | 1    | hyp              |      |   | PF14_0161   |             | 1  | 659538  |
| chr14 | 1237682 | 1237698 | -1   | hyp              |      | 5 | PF14_0293   |             | -1 | 1237067 |
| chr14 | 1919382 | 1919397 | -1   | putative centrin |      |   | PF14_0443   |             | -1 | 1917953 |
| chr14 | 2261182 | 2261198 | -1   |                  |      |   | PF14_0527   | exon        | 1  | 2259401 |
| chr2  | 3053    | 3068    | + -1 | TARE             |      |   |             |             |    |         |
| chr2  | 3188    | 3203    | + -1 | TARE             | 120  |   |             |             |    |         |
| chr2  | 3323    | 3338    | + -1 | TARE             | 120  |   |             |             |    |         |
| chr2  | 3458    | 3473    | + -1 | TARE             | 120  |   |             |             |    |         |
| chr2  | 3593    | 3608    | + -1 | TARE             | 120  |   |             |             |    |         |
| chr2  | 4019    | 4034    | + -1 | TARE             | 411  |   |             |             |    |         |
| chr2  | 4154    | 4169    | + -1 | TARE             | 120  |   |             |             |    |         |
| chr2  | 4289    | 4304    | + -1 | TARE             | 120  |   |             |             |    |         |
| chr2  | 4559    | 4574    | + -1 | TARE             | 255  |   |             |             |    |         |
| chr2  | 4715    | 4730    | + -1 | TARE             | 141  |   |             |             |    |         |
| chr2  | 5350    | 5365    | + -1 | TARE             | 620  |   |             |             |    |         |
| chr2  | 5506    | 5521    | + 1  | TARE             | 141  |   |             |             |    |         |
| chr2  | 5688    | 5703    | + -1 | TARE             | 167  |   |             |             |    |         |
| chr2  | 6033    | 6048    | + 1  | TARE             | 330  |   |             |             |    |         |
| chr2  | 6163    | 6179    | + -1 | TARE             | 115  | 5 |             |             |    |         |
| chr2  | 6441    | 6456    | + 1  | TARE             | 262  |   |             |             |    |         |
| chr2  | 6852    | 6868    | + -1 | TARE             | 396  | 5 |             |             |    |         |
| chr2  | 7130    | 7145    | + 1  | TARE             | 262  |   |             |             |    |         |
| chr2  | 8509    | 8524    | + 1  | TARE             | 1364 |   |             |             |    |         |
| chr2  | 10100   | 10115   | -1   | TARE             | 1576 |   |             |             |    |         |
| chr2  | 22417   | 22433   | + 1  | var              |      | 5 | PFB0010w    |             | 1  | 25232   |
| chr2  | 22419   | 22435   | + -1 | var              | -14  | 5 | PFB0010w    |             |    |         |
| chr2  | 22475   | 22491   | + 1  | var              | 40   | 5 | PFB0010w    |             |    |         |

|      |         |         |   |    |         |      |   |          |          |    |         |  |
|------|---------|---------|---|----|---------|------|---|----------|----------|----|---------|--|
| chr2 | 22477   | 22493   | + | -1 | var     | -14  | 5 | PFB0010w |          |    |         |  |
| chr2 | 22910   | 22925   | + | 1  | var     | 417  |   | PFB0010w |          |    |         |  |
| chr2 | 22937   | 22952   | + | 1  | var     | 12   |   | PFB0010w |          |    |         |  |
| chr2 | 22964   | 22979   | + | 1  | var     | 12   |   | PFB0010w |          |    |         |  |
| chr2 | 22992   | 23007   | + | 1  | var     | 13   |   | PFB0010w |          |    |         |  |
| chr2 | 23020   | 23035   | + | 1  | var     | 13   |   | PFB0010w |          |    |         |  |
| chr2 | 23047   | 23062   | + | 1  | var     | 12   |   | PFB0010w |          |    |         |  |
| chr2 | 23074   | 23089   |   | 1  | var     | 12   |   | PFB0010w |          |    |         |  |
| chr2 | 23102   | 23117   |   | 1  | var     | 13   |   | PFB0010w |          |    |         |  |
| chr2 | 610088  | 610104  |   | -1 | hyp     |      | 5 | PFB0680w | exon1    | 1  | 610087  |  |
| chr2 | 925761  | 925776  |   | -1 | var     |      |   | PFB1055c |          | -1 | 923648  |  |
| chr2 | 925783  | 925798  |   | -1 | var     | 7    |   | PFB1055c |          |    |         |  |
| chr2 | 925805  | 925820  |   | -1 | var     | 7    |   | PFB1055c |          |    |         |  |
| chr2 | 925827  | 925842  |   | -1 | var     | 7    |   | PFB1055c |          |    |         |  |
| chr2 | 925849  | 925864  |   | -1 | var     | 7    |   | PFB1055c |          |    |         |  |
| chr2 | 925871  | 925886  |   | -1 | var     | 7    |   | PFB1055c |          |    |         |  |
| chr2 | 925893  | 925908  |   | -1 | var     | 7    |   | PFB1055c |          |    |         |  |
| chr2 | 925915  | 925930  |   | -1 | var     | 7    |   | PFB1055c |          |    |         |  |
| chr2 | 925937  | 925952  |   | -1 | var     | 7    |   | PFB1055c |          |    |         |  |
| chr2 | 925959  | 925974  |   | -1 | var     | 7    |   | PFB1055c |          |    |         |  |
| chr2 | 925981  | 925996  |   | -1 | var     | 7    |   | PFB1055c |          |    |         |  |
| chr2 | 926003  | 926018  |   | -1 | var     | 7    |   | PFB1055c |          |    |         |  |
| chr2 | 926025  | 926040  |   | -1 | var     | 7    |   | PFB1055c |          |    |         |  |
| chr2 | 926052  | 926067  |   | -1 | var     | 12   |   | PFB1055c |          |    |         |  |
| chr2 | 926282  | 926298  | + | 1  | var     | 215  | 5 | PFB1055c |          |    |         |  |
| chr2 | 926284  | 926300  | + | -1 | var     | -14  | 5 | PFB1055c |          |    |         |  |
| chr2 | 926385  | 926401  | + | 1  | var     | 85   | 5 | PFB1055c |          |    |         |  |
| chr2 | 926387  | 926403  | + | -1 | var     | -14  | 5 | PFB1055c |          |    |         |  |
| chr2 | 937952  | 937967  |   | 1  | TARE    |      |   |          |          |    |         |  |
| chr2 | 939552  | 939567  |   | -1 | TARE    | 1585 |   |          |          |    |         |  |
| chr2 | 941897  | 941913  | + | 1  | TARE    | 2330 | 5 |          |          |    |         |  |
| chr2 | 942028  | 942043  | + | -1 | TARE    | 115  |   |          |          |    |         |  |
| chr2 | 942555  | 942570  |   | -1 | TARE    | 512  |   |          |          |    |         |  |
| chr2 | 942711  | 942726  |   | 1  | TARE    | 141  |   |          |          |    |         |  |
| chr2 | 943348  | 943363  |   | 1  | TARE    | 622  |   |          |          |    |         |  |
| chr2 | 943639  | 943654  |   | 1  | TARE    | 276  |   |          |          |    |         |  |
| chr2 | 943774  | 943789  | + | 1  | TARE    | 120  |   |          |          |    |         |  |
| chr2 | 943909  | 943924  | + | 1  | TARE    | 120  |   |          |          |    |         |  |
| chr2 | 944044  | 944059  | + | 1  | TARE    | 120  |   |          |          |    |         |  |
| chr2 | 944335  | 944350  | + | 1  | TARE    | 276  |   |          |          |    |         |  |
| chr2 | 944605  | 944620  | + | 1  | TARE    | 255  |   |          |          |    |         |  |
| chr2 | 944875  | 944890  | + | 1  | TARE    | 255  |   |          |          |    |         |  |
| chr2 | 945010  | 945025  | + | 1  | TARE    | 120  |   |          |          |    |         |  |
| chr2 | 945012  | 945027  | + | -1 | TARE    | -13  |   |          |          |    |         |  |
| chr3 | 1362    | 1377    |   | -1 | TARE    |      |   |          |          |    |         |  |
| chr3 | 1497    | 1512    |   | -1 | TARE    | 120  |   |          |          |    |         |  |
| chr3 | 1767    | 1782    | + | -1 | TARE    | 255  |   |          |          |    |         |  |
| chr3 | 1902    | 1917    | + | -1 | TARE    | 120  |   |          |          |    |         |  |
| chr3 | 2037    | 2052    | + | -1 | TARE    | 120  |   |          |          |    |         |  |
| chr3 | 2328    | 2343    | + | -1 | TARE    | 276  |   |          |          |    |         |  |
| chr3 | 2463    | 2478    | + | -1 | TARE    | 120  |   |          |          |    |         |  |
| chr3 | 2598    | 2613    | + | -1 | TARE    | 120  |   |          |          |    |         |  |
| chr3 | 3024    | 3039    | + | -1 | TARE    | 411  |   |          |          |    |         |  |
| chr3 | 3743    | 3758    | + | -1 | TARE    | 704  |   |          |          |    |         |  |
| chr3 | 3899    | 3914    | + | 1  | TARE    | 141  |   |          |          |    |         |  |
| chr3 | 4081    | 4096    | + | -1 | TARE    | 167  |   |          |          |    |         |  |
| chr3 | 4426    | 4441    | + | 1  | TARE    | 330  |   |          |          |    |         |  |
| chr3 | 4556    | 4572    | + | -1 | TARE    | 115  | 5 |          |          |    |         |  |
| chr3 | 6903    | 6918    |   | 1  | TARE    | 2331 |   |          |          |    |         |  |
| chr3 | 8491    | 8506    |   | -1 | TARE    | 1573 |   |          |          |    |         |  |
| chr3 | 30989   | 31005   | + | 1  | var     |      | 5 | PFC0005w |          | 1  | 33641   |  |
| chr3 | 30991   | 31007   | + | -1 | var     | -14  | 5 | PFC0005w |          |    |         |  |
| chr3 | 31320   | 31335   | + | 1  | var     | 313  |   | PFC0005w |          |    |         |  |
| chr3 | 31343   | 31358   | + | 1  | var     | 8    |   | PFC0005w |          |    |         |  |
| chr3 | 31365   | 31380   | + | 1  | var     | 7    |   | PFC0005w |          |    |         |  |
| chr3 | 31387   | 31402   | + | 1  | var     | 7    |   | PFC0005w |          |    |         |  |
| chr3 | 31415   | 31430   | + | 1  | var     | 13   |   | PFC0005w |          |    |         |  |
| chr3 | 31442   | 31457   | + | 1  | var     | 12   |   | PFC0005w |          |    |         |  |
| chr3 | 31470   | 31485   | + | 1  | var     | 13   |   | PFC0005w |          |    |         |  |
| chr3 | 31498   | 31513   | + | 1  | var     | 13   |   | PFC0005w |          |    |         |  |
| chr3 | 199711  | 199726  |   | -1 | hyp     |      |   | PFC0180c | PFC0185w |    |         |  |
| chr3 | 1037163 | 1037178 |   | -1 | var/hyp |      |   | PFC1120c |          | -1 | 1034924 |  |
| chr3 | 1037190 | 1037205 |   | -1 | var/hyp | 12   |   | PFC1120c |          |    |         |  |
| chr3 | 1037217 | 1037232 |   | -1 | var/hyp | 12   |   | PFC1120c |          |    |         |  |
| chr3 | 1037244 | 1037259 |   | -1 | var/hyp | 12   |   | PFC1120c |          |    |         |  |
| chr3 | 1037271 | 1037286 |   | -1 | var/hyp | 12   |   | PFC1120c |          |    |         |  |
| chr3 | 1037299 | 1037314 |   | -1 | var/hyp | 13   |   | PFC1120c |          |    |         |  |
| chr3 | 1037327 | 1037342 |   | -1 | var/hyp | 13   |   | PFC1120c |          |    |         |  |
| chr3 | 1037355 | 1037370 |   | -1 | var/hyp | 13   |   | PFC1120c |          |    |         |  |
| chr3 | 1037383 | 1037398 |   | -1 | var/hyp | 13   |   | PFC1120c |          |    |         |  |
| chr3 | 1037410 | 1037425 |   | -1 | var/hyp | 12   |   | PFC1120c |          |    |         |  |
| chr3 | 1037438 | 1037453 |   | -1 | var/hyp | 13   |   | PFC1120c |          |    |         |  |
| chr3 | 1037465 | 1037480 |   | -1 | var/hyp | 12   |   | PFC1120c |          |    |         |  |
| chr3 | 1037492 | 1037507 |   | -1 | var/hyp | 12   |   | PFC1120c |          |    |         |  |

|      |         |         |    |         |                   |          |          |          |                  |
|------|---------|---------|----|---------|-------------------|----------|----------|----------|------------------|
| chr3 | 1037520 | 1037535 | -1 | var/hyp | 13                | PFC1120c |          |          |                  |
| chr3 | 1037542 | 1037557 | -1 | var/hyp | 7                 | PFC1120c |          |          |                  |
| chr3 | 1037566 | 1037581 | -1 | var/hyp | 9                 | PFC1120c |          |          |                  |
| chr3 | 1037588 | 1037603 | -1 | var/hyp | 7                 | PFC1120c |          |          |                  |
| chr3 | 1037610 | 1037625 | -1 | var/hyp | 7                 | PFC1120c |          |          |                  |
| chr3 | 1037840 | 1037856 | +  | 1       | var/hyp           | 215      | PFC1120c |          |                  |
| chr3 | 1037842 | 1037858 | +  | -1      | var/hyp           | -14      | PFC1120c |          |                  |
| chr3 | 1038022 | 1038038 | +  | 1       | var/hyp           | 164      | PFC1120c |          |                  |
| chr3 | 1038024 | 1038040 | +  | -1      | var/hyp           | -14      | PFC1120c |          |                  |
| chr3 | 1051232 | 1051247 |    | 1       | TARE              |          |          |          |                  |
| chr3 | 1051871 | 1051886 |    | 1       | TARE              | 624      |          |          |                  |
| chr3 | 1052851 | 1052866 |    | -1      | TARE              | 965      |          |          |                  |
| chr3 | 1054920 | 1054935 | +  | -1      | TARE              | 2054     |          |          |                  |
| chr3 | 1055197 | 1055213 | +  | 1       | TARE              | 262      | 5        |          |                  |
| chr3 | 1055328 | 1055343 | +  | -1      | TARE              | 115      |          |          |                  |
| chr3 | 1055673 | 1055688 | +  | 1       | TARE              | 330      |          |          |                  |
| chr3 | 1055855 | 1055870 | +  | -1      | TARE              | 167      |          |          |                  |
| chr3 | 1056011 | 1056026 | +  | 1       | TARE              | 141      |          |          |                  |
| chr3 | 1056646 | 1056661 | +  | 1       | TARE              | 620      |          |          |                  |
| chr3 | 1057072 | 1057087 | +  | 1       | TARE              | 411      |          |          |                  |
| chr3 | 1057207 | 1057222 | +  | 1       | TARE              | 120      |          |          |                  |
| chr3 | 1057342 | 1057357 | +  | 1       | TARE              | 120      |          |          |                  |
| chr3 | 1057633 | 1057648 | +  | 1       | TARE              | 276      |          |          |                  |
| chr3 | 1057768 | 1057783 | +  | 1       | TARE              | 120      |          |          |                  |
| chr3 | 1057903 | 1057918 | +  | 1       | TARE              | 120      |          |          |                  |
| chr3 | 1058173 | 1058188 | +  | 1       | TARE              | 255      |          |          |                  |
| chr3 | 1058308 | 1058323 |    | 1       | TARE              | 120      |          |          |                  |
| chr4 | 8314    | 8329    | +  | -1      | TARE              |          |          |          |                  |
| chr4 | 8449    | 8464    | +  | -1      | TARE              | 120      |          |          |                  |
| chr4 | 8719    | 8734    | +  | -1      | TARE              | 255      |          |          |                  |
| chr4 | 8854    | 8869    | +  | -1      | TARE              | 120      |          |          |                  |
| chr4 | 8989    | 9004    | +  | -1      | TARE              | 120      |          |          |                  |
| chr4 | 9281    | 9296    | +  | -1      | TARE              | 277      |          |          |                  |
| chr4 | 9416    | 9431    | +  | -1      | TARE              | 120      |          |          |                  |
| chr4 | 9551    | 9566    | +  | -1      | TARE              | 120      |          |          |                  |
| chr4 | 9842    | 9857    | +  | -1      | TARE              | 276      |          |          |                  |
| chr4 | 10478   | 10493   | +  | -1      | TARE              | 621      |          |          |                  |
| chr4 | 10634   | 10649   | +  | 1       | TARE              | 141      |          |          |                  |
| chr4 | 10816   | 10831   | +  | -1      | TARE              | 167      |          |          |                  |
| chr4 | 11161   | 11176   | +  | 1       | TARE              | 330      |          |          |                  |
| chr4 | 11291   | 11307   | +  | -1      | TARE              | 115      | 5        |          |                  |
| chr4 | 11570   | 11585   | +  | 1       | TARE              | 263      |          |          |                  |
| chr4 | 13638   | 13653   |    | 1       | TARE              | 2053     |          |          |                  |
| chr4 | 15257   | 15272   |    | -1      | TARE              | 1604     |          |          |                  |
| chr4 | 32590   | 32606   | +  | 1       | var               |          | 5        | PFD0005w | 1 35153          |
| chr4 | 32592   | 32608   | +  | -1      | var               | -14      | 5        | PFD0005w |                  |
| chr4 | 32690   | 32706   | +  | 1       | var               | 82       | 5        | PFD0005w |                  |
| chr4 | 32692   | 32708   | +  | -1      | var               | -14      | 5        | PFD0005w |                  |
| chr4 | 32864   | 32879   | +  | 1       | var               | 156      |          | PFD0005w |                  |
| chr4 | 32887   | 32902   | +  | 1       | var               | 8        |          | PFD0005w |                  |
| chr4 | 32910   | 32925   | +  | 1       | var               | 8        |          | PFD0005w |                  |
| chr4 | 32937   | 32952   | +  | 1       | var               | 12       |          | PFD0005w |                  |
| chr4 | 32964   | 32979   | +  | 1       | var               | 12       |          | PFD0005w |                  |
| chr4 | 32991   | 33006   | +  | 1       | var               | 12       |          | PFD0005w |                  |
| chr4 | 270350  | 270365  |    | 1       | protease putative |          |          | PFD0230c | PFD0235c -1      |
| chr4 | 270352  | 270367  |    | -1      | protease putative | -13      |          | PFD0230c | -1 269883        |
| chr4 | 326137  | 326153  |    | 1       | hyp               |          | 5        | PFD0300w | 1 327491         |
| chr4 | 879424  | 879439  |    | 1       | hyp               |          |          | PFD0955w | 1 880118         |
| chr4 | 1185858 | 1185873 |    | -1      | var               |          |          | PFD1245c | -1 1183848       |
| chr4 | 1185885 | 1185900 |    | -1      | var               | 12       |          | PFD1245c |                  |
| chr4 | 1185912 | 1185927 |    | -1      | var               | 12       |          | PFD1245c |                  |
| chr4 | 1185939 | 1185954 |    | -1      | var               | 12       |          | PFD1245c |                  |
| chr4 | 1185966 | 1185981 |    | -1      | var               | 12       |          | PFD1245c |                  |
| chr4 | 1185993 | 1186008 |    | -1      | var               | 12       |          | PFD1245c |                  |
| chr4 | 1186020 | 1186035 |    | -1      | var               | 12       |          | PFD1245c |                  |
| chr4 | 1186047 | 1186062 |    | -1      | var               | 12       |          | PFD1245c |                  |
| chr4 | 1186075 | 1186090 |    | -1      | var               | 13       |          | PFD1245c |                  |
| chr4 | 1186102 | 1186117 |    | -1      | var               | 12       |          | PFD1245c |                  |
| chr4 | 1186130 | 1186145 |    | -1      | var               | 13       |          | PFD1245c |                  |
| chr4 | 1186158 | 1186173 |    | -1      | var               | 13       |          | PFD1245c |                  |
| chr4 | 1186181 | 1186196 |    | -1      | var               | 8        |          | PFD1245c |                  |
| chr4 | 1186563 | 1186579 | +  | 1       | var               | 367      | 5        | PFD1245c |                  |
| chr4 | 1186565 | 1186581 |    | -1      | var               | -14      | 5        | PFD1245c |                  |
| chr4 | 1195676 | 1195691 |    | 1       | hyp               | 9095     |          | PFD1250w | intron 1 1192754 |
| chr4 | 1197297 | 1197312 |    | -1      | TARE              | 1606     |          |          |                  |
| chr4 | 1198952 | 1198968 | +  | 1       | TARE              | 1640     | 5        |          |                  |
| chr4 | 1199083 | 1199098 | +  | -1      | TARE              | 115      |          |          |                  |
| chr4 | 1199428 | 1199443 | +  | 1       | TARE              | 330      |          |          |                  |
| chr4 | 1199610 | 1199625 | +  | -1      | TARE              | 167      |          |          |                  |
| chr4 | 1199766 | 1199781 |    | 1       | TARE              | 141      |          |          |                  |
| chr4 | 1200401 | 1200416 |    | 1       | TARE              | 620      |          |          |                  |
| chr4 | 1200557 | 1200572 |    | 1       | TARE              | 141      |          |          |                  |
| chr4 | 1200692 | 1200707 |    | 1       | TARE              | 120      |          |          |                  |
| chr4 | 1200827 | 1200842 |    | 1       | TARE              | 120      |          |          |                  |



|      |         |         |    |      |      |      |            |            |         |       |
|------|---------|---------|----|------|------|------|------------|------------|---------|-------|
| chr7 | 5870    | 5885    | -1 | TARE | 120  |      |            |            |         |       |
| chr7 | 6005    | 6020    | -1 | TARE | 120  |      |            |            |         |       |
| chr7 | 6140    | 6155    | -1 | TARE | 120  |      |            |            |         |       |
| chr7 | 6275    | 6290    | -1 | TARE | 120  |      |            |            |         |       |
| chr7 | 6410    | 6425    | -1 | TARE | 120  |      |            |            |         |       |
| chr7 | 6566    | 6581    | -1 | TARE | 141  |      |            |            |         |       |
| chr7 | 7138    | 7153    | -1 | TARE | 557  |      |            |            |         |       |
| chr7 | 7294    | 7309    | 1  | TARE | 141  |      |            |            |         |       |
| chr7 | 7476    | 7491    | -1 | TARE | 167  |      |            |            |         |       |
| chr7 | 7821    | 7836    | 1  | TARE | 330  |      |            |            |         |       |
| chr7 | 7951    | 7967    | -1 | TARE | 115  | 5    |            |            |         |       |
| chr7 | 9608    | 9623    | 1  | TARE | 1641 |      |            |            |         |       |
| chr7 | 10580   | 10595   | -1 | TARE | 957  |      |            |            |         |       |
| chr7 | 11208   | 11223   | -1 | TARE | 613  |      |            |            |         |       |
| chr7 | 27640   | 27656   | 1  | var  |      | 5    | MAL7P1.212 | 1          | 30673   |       |
| chr7 | 27642   | 27658   | -1 | var  | -14  | 5    | MAL7P1.212 |            |         |       |
| chr7 | 27695   | 27711   | 1  | var  | 37   | 5    | MAL7P1.212 |            |         |       |
| chr7 | 27697   | 27713   | -1 | var  | -14  | 5    | MAL7P1.212 |            |         |       |
| chr7 | 28211   | 28226   | 1  | var  | 498  |      | MAL7P1.212 |            |         |       |
| chr7 | 28238   | 28253   | 1  | var  | 12   |      | MAL7P1.212 |            |         |       |
| chr7 | 28265   | 28280   | 1  | var  | 12   |      | MAL7P1.212 |            |         |       |
| chr7 | 28294   | 28309   | 1  | var  | 14   |      | MAL7P1.212 |            |         |       |
| chr7 | 28322   | 28337   | 1  | var  | 13   |      | MAL7P1.212 |            |         |       |
| chr7 | 28350   | 28365   | 1  | var  | 13   |      | MAL7P1.212 |            |         |       |
| chr7 | 28378   | 28393   | 1  | var  | 13   |      | MAL7P1.212 |            |         |       |
| chr7 | 28406   | 28421   | 1  | var  | 13   |      | MAL7P1.212 |            |         |       |
| chr7 | 28434   | 28449   | 1  | var  | 13   |      | MAL7P1.212 |            |         |       |
| chr7 | 28462   | 28477   | 1  | var  | 13   |      | MAL7P1.212 |            |         |       |
| chr7 | 28486   | 28501   | 1  | var  | 9    |      | MAL7P1.212 |            |         |       |
| chr7 | 28510   | 28525   | 1  | var  | 9    |      | MAL7P1.212 |            |         |       |
| chr7 | 28538   | 28553   | 1  | var  | 13   |      | MAL7P1.212 |            |         |       |
| chr7 | 1483602 | 1483617 | -1 | var  |      |      | MAL7P1.187 | -1         | 1481610 |       |
| chr7 | 1483630 | 1483645 | -1 | var  | 13   |      | MAL7P1.187 |            |         |       |
| chr7 | 1483657 | 1483672 | -1 | var  | 12   |      | MAL7P1.187 |            |         |       |
| chr7 | 1483685 | 1483700 | -1 | var  | 13   |      | MAL7P1.187 |            |         |       |
| chr7 | 1483708 | 1483723 | -1 | var  | 8    |      | MAL7P1.187 |            |         |       |
| chr7 | 1483735 | 1483750 | -1 | var  | 12   |      | MAL7P1.187 |            |         |       |
| chr7 | 1484407 | 1484423 | +  | 1    | var  | 657  | 5          | MAL7P1.187 |         |       |
| chr7 | 1484409 | 1484425 | +  | -1   | var  | -14  | 5          | MAL7P1.187 |         |       |
| chr7 | 1492987 | 1493002 | 1  | TARE |      |      |            |            |         |       |
| chr7 | 1494589 | 1494604 | -1 | TARE | 1587 |      |            |            |         |       |
| chr7 | 1496657 | 1496672 | +  | -1   | TARE | 2053 |            |            |         |       |
| chr7 | 1496934 | 1496950 | +  | 1    | TARE | 262  | 5          |            |         |       |
| chr7 | 1497065 | 1497080 | +  | -1   | TARE | 115  |            |            |         |       |
| chr7 | 1497410 | 1497425 | +  | 1    | TARE | 330  |            |            |         |       |
| chr7 | 1497592 | 1497607 | -1 | TARE | 167  |      |            |            |         |       |
| chr7 | 1498425 | 1498440 | 1  | TARE | 818  |      |            |            |         |       |
| chr7 | 1498716 | 1498731 | +  | 1    | TARE | 276  |            |            |         |       |
| chr7 | 1498851 | 1498866 | +  | 1    | TARE | 120  |            |            |         |       |
| chr7 | 1498986 | 1499001 | +  | 1    | TARE | 120  |            |            |         |       |
| chr7 | 1499277 | 1499292 | +  | 1    | TARE | 276  |            |            |         |       |
| chr7 | 1499412 | 1499427 | +  | 1    | TARE | 120  |            |            |         |       |
| chr7 | 1499547 | 1499562 | +  | 1    | TARE | 120  |            |            |         |       |
| chr7 | 1499817 | 1499832 | +  | 1    | TARE | 255  |            |            |         |       |
| chr7 | 1499952 | 1499967 | 1  | TARE | 120  |      |            |            |         |       |
| chr8 | 3090    | 3105    | -1 | TARE |      |      |            |            |         |       |
| chr8 | 3225    | 3240    | -1 | TARE | 120  |      |            |            |         |       |
| chr8 | 3360    | 3375    | +  | -1   | TARE | 120  |            |            |         |       |
| chr8 | 3495    | 3510    | +  | -1   | TARE | 120  |            |            |         |       |
| chr8 | 3630    | 3645    | +  | -1   | TARE | 120  |            |            |         |       |
| chr8 | 3765    | 3780    | +  | -1   | TARE | 120  |            |            |         |       |
| chr8 | 4056    | 4071    | +  | -1   | TARE | 276  |            |            |         |       |
| chr8 | 4191    | 4206    | +  | -1   | TARE | 120  |            |            |         |       |
| chr8 | 4326    | 4341    | +  | -1   | TARE | 120  |            |            |         |       |
| chr8 | 4461    | 4476    | +  | -1   | TARE | 120  |            |            |         |       |
| chr8 | 4752    | 4767    | -1 | TARE | 276  |      |            |            |         |       |
| chr8 | 5387    | 5402    | -1 | TARE | 620  |      |            |            |         |       |
| chr8 | 5543    | 5558    | 1  | TARE | 141  |      |            |            |         |       |
| chr8 | 5725    | 5740    | +  | -1   | TARE | 167  |            |            |         |       |
| chr8 | 6070    | 6085    | +  | 1    | TARE | 330  |            |            |         |       |
| chr8 | 6200    | 6216    | +  | -1   | TARE | 115  | 5          |            |         |       |
| chr8 | 6478    | 6493    | +  | 1    | TARE | 262  |            |            |         |       |
| chr8 | 6914    | 6929    | +  | -1   | TARE | 421  |            |            |         |       |
| chr8 | 7168    | 7183    | +  | 1    | TARE | 239  |            |            |         |       |
| chr8 | 7857    | 7872    | +  | 1    | TARE | 674  |            |            |         |       |
| chr8 | 19536   | 19552   | +  | 1    | var  |      | 5          | PF08 0142  | 1       | 22369 |
| chr8 | 19538   | 19554   | +  | -1   | var  | -14  | 5          | PF08 0142  |         |       |
| chr8 | 19915   | 19930   | +  | 1    | var  | 361  |            | PF08 0142  |         |       |
| chr8 | 19938   | 19953   | +  | 1    | var  | 8    |            | PF08 0142  |         |       |
| chr8 | 19961   | 19976   | +  | 1    | var  | 8    |            | PF08 0142  |         |       |
| chr8 | 19984   | 19999   | +  | 1    | var  | 8    |            | PF08 0142  |         |       |
| chr8 | 20007   | 20022   | +  | 1    | var  | 8    |            | PF08 0142  |         |       |
| chr8 | 20030   | 20045   | +  | 1    | var  | 8    |            | PF08 0142  |         |       |
| chr8 | 20053   | 20068   | +  | 1    | var  | 8    |            | PF08 0142  |         |       |



|      |         |         |   |    |                                      |  |      |              |        |  |    |         |
|------|---------|---------|---|----|--------------------------------------|--|------|--------------|--------|--|----|---------|
| chr8 | 20075   | 20090   | + | 1  | var                                  |  | 7    | PF08_0142    |        |  |    |         |
| chr8 | 20097   | 20112   | + | 1  | var                                  |  | 7    | PF08_0142    |        |  |    |         |
| chr8 | 20119   | 20134   | + | 1  | var                                  |  | 7    | PF08_0142    |        |  |    |         |
| chr8 | 20147   | 20162   | + | 1  | var                                  |  | 13   | PF08_0142    |        |  |    |         |
| chr8 | 20174   | 20189   | + | 1  | var                                  |  | 12   | PF08_0142    |        |  |    |         |
| chr8 | 20202   | 20217   | + | 1  | var                                  |  | 13   | PF08_0142    |        |  |    |         |
| chr8 | 20229   | 20244   | + | 1  | var                                  |  | 12   | PF08_0142    |        |  |    |         |
| chr8 | 20256   | 20271   | + | 1  | var                                  |  | 12   | PF08_0142    |        |  |    |         |
| chr8 | 26307   | 26323   |   | 1  | var                                  |  | 5    | PF08_0142    | exon 1 |  |    |         |
| chr8 | 208975  | 208991  |   | 1  | hyp                                  |  | 5    | MAL8P1.145   |        |  | 1  | 209571  |
| chr8 | 400130  | 400145  |   | -1 | serine protease putative             |  |      | MAL8P1.126   |        |  | -1 | 399909  |
| chr8 | 1124705 | 1124721 |   | -1 | ubiquitin protein liqase 1, putative |  | 5    | MAL8P1.23    | exon   |  | -1 | 1140216 |
| chr8 | 1401461 | 1401476 | + | -1 | var                                  |  |      | MAL8P1.220   |        |  | -1 | 1399234 |
| chr8 | 1401488 | 1401503 | + | -1 | var                                  |  | 12   | MAL8P1.220   |        |  |    |         |
| chr8 | 1401515 | 1401530 | + | -1 | var                                  |  | 12   | MAL8P1.220   |        |  |    |         |
| chr8 | 1401542 | 1401557 | + | -1 | var                                  |  | 12   | MAL8P1.220   |        |  |    |         |
| chr8 | 1401570 | 1401585 | + | -1 | var                                  |  | 13   | MAL8P1.220   |        |  |    |         |
| chr8 | 1401598 | 1401613 | + | -1 | var                                  |  | 13   | MAL8P1.220   |        |  |    |         |
| chr8 | 1401625 | 1401640 | + | -1 | var                                  |  | 12   | MAL8P1.220   |        |  |    |         |
| chr8 | 1401653 | 1401668 | + | -1 | var                                  |  | 13   | MAL8P1.220   |        |  |    |         |
| chr8 | 1401680 | 1401695 | + | -1 | var                                  |  | 12   | MAL8P1.220   |        |  |    |         |
| chr8 | 1401707 | 1401722 | + | -1 | var                                  |  | 12   | MAL8P1.220   |        |  |    |         |
| chr8 | 1401730 | 1401745 | + | -1 | var                                  |  | 8    | MAL8P1.220   |        |  |    |         |
| chr8 | 1402058 | 1402074 | + | 1  | var                                  |  | 313  | 5 MAL8P1.220 |        |  |    |         |
| chr8 | 1402060 | 1402076 | + | -1 | var                                  |  | -14  | 5 MAL8P1.220 |        |  |    |         |
| chr8 | 1410598 | 1410613 |   | 1  | hyp                                  |  | 8522 | MAL8P1.330   |        |  | 1  | 1412780 |
| chr8 | 1411226 | 1411241 |   | 1  | hyp                                  |  | 613  | MAL8P1.330   |        |  | 1  | 1412780 |
| chr8 | 1412206 | 1412221 | + | -1 | hyp                                  |  | 965  | MAL8P1.330   |        |  | 1  | 1412780 |
| chr8 | 1413861 | 1413877 | + | 1  | TARE                                 |  | 1640 | 5            |        |  |    |         |
| chr8 | 1413992 | 1414007 | + | -1 | TARE                                 |  | 115  |              |        |  |    |         |
| chr8 | 1414337 | 1414352 | + | 1  | TARE                                 |  | 330  |              |        |  |    |         |
| chr8 | 1414519 | 1414534 | + | -1 | TARE                                 |  | 167  |              |        |  |    |         |
| chr8 | 1414675 | 1414690 | + | 1  | TARE                                 |  | 141  |              |        |  |    |         |
| chr8 | 1415310 | 1415325 | + | 1  | TARE                                 |  | 620  |              |        |  |    |         |
| chr8 | 1415466 | 1415481 | + | 1  | TARE                                 |  | 141  |              |        |  |    |         |
| chr8 | 1415601 | 1415616 | + | 1  | TARE                                 |  | 120  |              |        |  |    |         |
| chr8 | 1415736 | 1415751 | + | 1  | TARE                                 |  | 120  |              |        |  |    |         |
| chr8 | 1415871 | 1415886 | + | 1  | TARE                                 |  | 120  |              |        |  |    |         |
| chr8 | 1416006 | 1416021 | + | 1  | TARE                                 |  | 120  |              |        |  |    |         |
| chr8 | 1416297 | 1416312 | + | 1  | TARE                                 |  | 276  |              |        |  |    |         |
| chr8 | 1416432 | 1416447 | + | 1  | TARE                                 |  | 120  |              |        |  |    |         |
| chr8 | 1416567 | 1416582 | + | 1  | TARE                                 |  | 120  |              |        |  |    |         |
| chr8 | 1417242 | 1417257 |   | 1  | TARE                                 |  | 660  |              |        |  |    |         |
| chr8 | 1417377 | 1417392 |   | 1  | TARE                                 |  | 120  |              |        |  |    |         |
| chr9 | 979     | 994     | + | -1 | TARE                                 |  |      |              |        |  |    |         |
| chr9 | 1114    | 1129    | + | -1 | TARE                                 |  | 120  |              |        |  |    |         |
| chr9 | 1249    | 1264    | + | -1 | TARE                                 |  | 120  |              |        |  |    |         |
| chr9 | 1384    | 1399    | + | -1 | TARE                                 |  | 120  |              |        |  |    |         |
| chr9 | 1519    | 1534    | + | -1 | TARE                                 |  | 120  |              |        |  |    |         |
| chr9 | 1654    | 1669    | + | -1 | TARE                                 |  | 120  |              |        |  |    |         |
| chr9 | 1789    | 1804    | + | -1 | TARE                                 |  | 120  |              |        |  |    |         |
| chr9 | 2080    | 2095    | + | -1 | TARE                                 |  | 276  |              |        |  |    |         |
| chr9 | 2215    | 2230    | + | -1 | TARE                                 |  | 120  |              |        |  |    |         |
| chr9 | 2350    | 2365    | + | -1 | TARE                                 |  | 120  |              |        |  |    |         |
| chr9 | 2641    | 2656    | + | -1 | TARE                                 |  | 276  |              |        |  |    |         |
| chr9 | 3277    | 3292    | + | -1 | TARE                                 |  | 621  |              |        |  |    |         |
| chr9 | 3433    | 3448    | + | 1  | TARE                                 |  | 141  |              |        |  |    |         |
| chr9 | 3615    | 3630    | + | -1 | TARE                                 |  | 167  |              |        |  |    |         |
| chr9 | 3960    | 3975    | + | 1  | TARE                                 |  | 330  |              |        |  |    |         |
| chr9 | 4090    | 4106    | + | -1 | TARE                                 |  | 115  | 5            |        |  |    |         |
| chr9 | 6436    | 6451    |   | 1  | TARE                                 |  | 2330 |              |        |  |    |         |
| chr9 | 8045    | 8060    |   | -1 | TARE                                 |  | 1594 |              |        |  |    |         |
| chr9 | 17198   | 17214   | + | 1  | var                                  |  | 5    | PFI0005w     |        |  | 1  | 20080   |
| chr9 | 17200   | 17216   | + | -1 | var                                  |  | -14  | 5 PFI0005w   |        |  |    |         |
| chr9 | 17255   | 17271   | + | 1  | var                                  |  | 39   | 5 PFI0005w   |        |  |    |         |
| chr9 | 17257   | 17273   | + | -1 | var                                  |  | -14  | 5 PFI0005w   |        |  |    |         |
| chr9 | 17527   | 17542   | + | 1  | var                                  |  | 254  | PFI0005w     |        |  |    |         |
| chr9 | 17554   | 17569   | + | 1  | var                                  |  | 12   | PFI0005w     |        |  |    |         |
| chr9 | 17581   | 17596   | + | 1  | var                                  |  | 12   | PFI0005w     |        |  |    |         |
| chr9 | 17608   | 17623   | + | 1  | var                                  |  | 12   | PFI0005w     |        |  |    |         |
| chr9 | 17635   | 17650   | + | 1  | var                                  |  | 12   | PFI0005w     |        |  |    |         |
| chr9 | 17662   | 17677   | + | 1  | var                                  |  | 12   | PFI0005w     |        |  |    |         |
| chr9 | 17689   | 17704   | + | 1  | var                                  |  | 12   | PFI0005w     |        |  |    |         |
| chr9 | 17716   | 17731   | + | 1  | var                                  |  | 12   | PFI0005w     |        |  |    |         |
| chr9 | 17743   | 17758   | + | 1  | var                                  |  | 12   | PFI0005w     |        |  |    |         |
| chr9 | 17771   | 17786   | + | 1  | var                                  |  | 13   | PFI0005w     |        |  |    |         |
| chr9 | 17798   | 17813   | + | 1  | var                                  |  | 12   | PFI0005w     |        |  |    |         |
| chr9 | 17826   | 17841   | + | 1  | var                                  |  | 13   | PFI0005w     |        |  |    |         |
| chr9 | 17853   | 17868   | + | 1  | var                                  |  | 12   | PFI0005w     |        |  |    |         |
| chr9 | 17881   | 17896   | + | 1  | var                                  |  | 13   | PFI0005w     |        |  |    |         |
| chr9 | 17908   | 17923   | + | 1  | var                                  |  | 12   | PFI0005w     |        |  |    |         |
| chr9 | 275999  | 276014  |   | -1 | RHOPH3                               |  |      | PFI0265c     |        |  | -1 | 274787  |
| chr9 | 373429  | 373444  |   | -1 | S1/P1 nuclease, putative             |  |      | PFI0385c     |        |  | -1 | 370444  |
| chr9 | 398159  | 398174  |   | -1 | hyp                                  |  |      | PFI0410c     |        |  | -1 | 398007  |

|      |         |         |   |    |      |  |      |            |          |    |         |
|------|---------|---------|---|----|------|--|------|------------|----------|----|---------|
| chr9 | 616555  | 616571  |   | 1  | hyp  |  | 5    | PFI0705w   |          | 1  | 617954  |
| chr9 | 1359737 | 1359752 |   | -1 | hyp  |  |      | PFI1680w   | PFI1685w | 1  |         |
| chr9 | 1505450 | 1505465 |   | -1 | var  |  |      | PFI1830c   |          | -1 | 1503324 |
| chr9 | 1505477 | 1505492 |   | -1 | var  |  | 12   | PFI1830c   |          |    |         |
| chr9 | 1505505 | 1505520 |   | -1 | var  |  | 13   | PFI1830c   |          |    |         |
| chr9 | 1505532 | 1505547 | + | -1 | var  |  | 12   | PFI1830c   |          |    |         |
| chr9 | 1505559 | 1505574 | + | -1 | var  |  | 12   | PFI1830c   |          |    |         |
| chr9 | 1505587 | 1505602 | + | -1 | var  |  | 13   | PFI1830c   |          |    |         |
| chr9 | 1505614 | 1505629 | + | -1 | var  |  | 12   | PFI1830c   |          |    |         |
| chr9 | 1505641 | 1505656 | + | -1 | var  |  | 12   | PFI1830c   |          |    |         |
| chr9 | 1505669 | 1505684 | + | -1 | var  |  | 13   | PFI1830c   |          |    |         |
| chr9 | 1505692 | 1505707 | + | -1 | var  |  | 8    | PFI1830c   |          |    |         |
| chr9 | 1505715 | 1505730 | + | -1 | var  |  | 8    | PFI1830c   |          |    |         |
| chr9 | 1506187 | 1506202 | + | 1  | var  |  | 457  | PFI1830c   |          |    |         |
| chr9 | 1506189 | 1506204 | + | -1 | var  |  | -13  | PFI1830c   |          |    |         |
| chr9 | 1506243 | 1506259 | + | 1  | var  |  | 39   | 5 PFI1830c |          |    |         |
| chr9 | 1506245 | 1506261 | + | -1 | var  |  | -14  | 5 PFI1830c |          |    |         |
| chr9 | 1532044 | 1532059 |   | 1  | TARE |  |      |            |          |    |         |
| chr9 | 1533643 | 1533658 |   | -1 | TARE |  | 1584 |            |          |    |         |
| chr9 | 1535711 | 1535726 | + | -1 | TARE |  | 2053 |            |          |    |         |
| chr9 | 1535988 | 1536004 | + | 1  | TARE |  | 262  | 5          |          |    |         |
| chr9 | 1536119 | 1536134 | + | -1 | TARE |  | 115  |            |          |    |         |
| chr9 | 1536464 | 1536479 | + | 1  | TARE |  | 330  |            |          |    |         |
| chr9 | 1536646 | 1536661 | + | -1 | TARE |  | 167  |            |          |    |         |
| chr9 | 1536802 | 1536817 | + | 1  | TARE |  | 141  |            |          |    |         |
| chr9 | 1537441 | 1537456 | + | 1  | TARE |  | 624  |            |          |    |         |
| chr9 | 1537732 | 1537747 | + | 1  | TARE |  | 276  |            |          |    |         |
| chr9 | 1537867 | 1537882 | + | 1  | TARE |  | 120  |            |          |    |         |
| chr9 | 1538137 | 1538152 | + | 1  | TARE |  | 255  |            |          |    |         |
| chr9 | 1538428 | 1538443 | + | 1  | TARE |  | 276  |            |          |    |         |
| chr9 | 1538563 | 1538578 | + | 1  | TARE |  | 120  |            |          |    |         |
| chr9 | 1538698 | 1538713 | + | 1  | TARE |  | 120  |            |          |    |         |
| chr9 | 1538968 | 1538983 | + | 1  | TARE |  | 255  |            |          |    |         |
| chr9 | 1539103 | 1539118 | + | 1  | TARE |  | 120  |            |          |    |         |
