# Supplementary material for: A Major Role for the Plasmodium falciparum ApiAP2 Protein PfSIP2 in Chromosome End Biology
Source: PubMed Central journal article supplement (PMC2829057; doi:10.1371/journal.ppat.1000784), 2010-02-26
Supplement: ppat.1000784.s008.pdf [file ppat.1000784.s008.pdf]

**Table S4: Summary genome-wide SPE2 prediction**

| 1                   | 2             | 3          | 4          | 5             |      | 6           |           | 7                       |                | 8                          |            | 9                    |                    |
|---------------------|---------------|------------|------------|---------------|------|-------------|-----------|-------------------------|----------------|----------------------------|------------|----------------------|--------------------|
| SPE2 classification | SPE2 type     | total #    | # of genes | chr. location |      | orientation |           | clustered SPE2 elements |                | spacing between half sites |            | rel. position to ATG |                    |
|                     |               |            |            | subtel.       | cen. | sense       | antisense | avg. distance           | avg. # of SPE2 | 4 bp                       | 5 bp       | first                | last               |
| var genes           | upsB          | 330        | 24         | 328           | 2    | 297         | 33        |                         |                | 268                        | 62         |                      |                    |
|                     | cluster 1     | 264        | 24         | 262           | 2    | 264         | 0         | 12.3 (+/- 5.9)          | 11.0 (+/- 5.7) | 264                        | 0          | 2132.4 (+/- 70.2)    | 2403.1 (+/- 172.2) |
|                     | cluster 2     | 66         | 22         | 66            | 0    | 33          | 33        | 62.1 (+/- 43.2)         | 3.0 (+/- 1.3)  | 4                          | 62         | 2698.7 (+/- 162.3)   | 2774.3 (+/- 162.8) |
| other genes         | single SPE2   | 42         | 37         | 6             | 36   | 33          | 4         |                         |                | 27                         | 15         |                      |                    |
|                     | upstream      | 27         | 27         | 3             | 24   | 27          | 0         |                         |                | 18                         | 9          | 1096.0 (+/- 646.8)   |                    |
|                     | cds           | 10         | 10         | 2             | 8    | 6           | 4         |                         |                | 6                          | 4          |                      |                    |
|                     | intergenic    | 5          |            | 1             | 4    |             |           |                         |                | 3                          | 2          |                      |                    |
|                     | multiple SPE2 | 3          | 1          | 1             | 0    | 1           | 2         |                         |                | 3                          | 0          | 574                  | 2182               |
| TARE                | all           | 402        |            | 402           | 0    | 181         | 221       | 379.6 (+/- 525.2)       | 18.3 (+/- 2.5) | 379                        | 23         |                      |                    |
|                     | left          | 232        |            | 232           | 0    | 47          | 185       | 365.1 (+/- 487.7)       | 19.3 (+/- 3.0) | 219                        | 13         |                      |                    |
|                     | right         | 170        |            | 170           | 0    | 134         | 36        | 399.5 (+/- 573.7)       | 17.0 (+/- 0.9) | 160                        | 10         |                      |                    |
|                     | <b>TOTAL</b>  | <b>777</b> |            |               |      |             |           |                         |                | <b>677</b>                 | <b>100</b> |                      |                    |
